# Supplementary material for: Global Gene Expression Analysis Reveals Crosstalk between Response Mechanisms to Cold and Drought Stresses in Cassava Seedlings
Source: Front Plant Sci. 2017 Jul 18;8:1259. doi: 10.3389/fpls.2017.01259 (PMC5513928; doi:10.3389/fpls.2017.01259)
Supplement: Supplementary file 5 [file Table_4.XLSX]

## Sheet: Sheet1
Supplementary Table 4. Expression information of 1971 DEGs that co-induced or co-repressed by cold and drought stress
Gene ID	Fold Change		Pfam ID	Pfam Name	Homologs in Arabidopsis
	Cold	Drought
Manes.15G133000.v6.1	2.0074	5.3696	pfam06200	JAZ9	AT3G17860.1
Manes.11G016700.v6.1	12.5389	4.1026	pfam09425	JAZ2	AT1G19180.1
Manes.05G177000.v6.1	0.478434	0.102642	pfam14215	bHLH-MYC_N	AT1G60060.1
Manes.01G034800.v6.1	0.257678	0.177789	pfam13921	Myb_DNA-bind_6	AT1G69560.1
Manes.01G198000.v6.1	0.34731	0.0852727	pfam14215	bHLH-MYC_N	AT1G60060.1
Manes.03G208500.v6.1	13.8486	16.8411	pfam00249	Myb_DNA-binding	AT3G06490.1
Manes.13G118400.v6.1	4.44796	3.40981	pfam00249	Myb_DNA-binding	AT4G37260.1
Manes.15G088600.v6.1	3.00625	3.40573	pfam00481	PP2C	AT3G15260.1
Manes.17G021500.v6.1	3.0394	3.43281	pfam00069	SnRK2	AT4G33950.1
Manes.05G011300.v6.1	7.73561	4.6377	pfam00481	PP2C	AT3G62260.2
Manes.18G116200.v6.1	14.7696	15.1849	pfam00481	PP2C	AT1G07160.1
Manes.01G232600.v6.1	5.91506	8.24163	pfam00481	PP2C	AT3G62260.2
Manes.18G101300.v6.1	2.40001	12.7753	pfam00005	ABC_tran	AT1G71960.1
Manes.03G036900.v6.1	2.35545	10.0401	pfam00481	PP2C	AT1G72770.3
Manes.07G131300.v6.1	2.12226	2.11292	pfam00481	PP2C	AT2G40180.1
Manes.07G063300.v6.1	2.64738	2.58079	pfam00481	PP2C	AT4G33920.1
Manes.13G114100.v6.1	2.42292	3.29439	pfam00481	PP2C	AT4G33920.1
Manes.07G119400.v6.1	7.03133	96.5386	pfam00481	PP2C	AT3G11410.1
Manes.18G136400.v6.1	6.32445	2.24822	pfam00481	PP2C	AT2G30020.1
Manes.10G010600.v6.1	5.74727	3.15945	pfam00481	PP2C	AT2G40180.1
Manes.16G079500.v6.1	0.240109	0.176641	pfam10604	Polyketide_cyc2	AT2G26040.1
Manes.18G040000.v6.1	0.3451	0.319115	pfam13672	PP2C_2	0
Manes.01G012000.v6.1	0.176604	0.104875	pfam06203	CCT	AT1G25440.1
Manes.14G033500.v6.1	0.368317	0.208612	pfam07714	Pkinase_Tyr	AT5G51560.1
Manes.06G036600.v6.1	0.46364	0.404933	pfam02453	Reticulon	AT5G58000.1
Manes.13G065400.v6.1	0.375855	0.291438	pfam00561	Abhydrolase_1	AT5G14180.1
Manes.18G041600.v6.1	0.294388	0.157019	pfam00134	Cyclin_N	AT4G34160.1
Manes.07G140800.v6.1	0.309914	0.465943	pfam13639	zf-RING_2	AT3G10910.1
Manes.02G091100.v6.1	0.312943	0.335406	pfam00415	RCC1	AT5G60870.1
Manes.11G056600.v6.1	0.248128	0.208182	pfam14432	DYW_deaminase	AT4G21065.1
Manes.01G074200.v6.1	0.247673	0.0741107	pfam00067	p450	AT4G12320.1
Manes.07G120500.v6.1	0.403124	0.359099	pfam12099	DUF3575	0
Manes.07G122800.v6.1	0.258928	0.403327	pfam03759	PRONE	AT5G05940.1
Manes.11G006700.v6.1	0.449939	0.245341	pfam01094	ANF_receptor	AT2G29120.1
Manes.10G005500.v6.1	0.493704	0.481075	pfam05701	WEMBL	AT2G40480.1
Manes.14G134600.v6.1	0.375715	0.461537	pfam03000	NPH3	AT1G30440.1
Manes.03G039900.v6.1	0.421871	0.0366896	pfam00190	Cupin_1	AT5G20630.1
Manes.10G019800.v6.1	0.374954	0.306007	pfam12906	RINGv	AT5G05830.1
Manes.08G068200.v6.1	0.168718	0.426958	pfam13041	PPR_2	AT5G46680.1
Manes.03G027600.v6.1	0.405344	0.106538	pfam00664	ABC_membrane	AT3G28345.1
Manes.02G135500.v6.1	0.437264	0.3662	pfam01344	Kelch_1	AT5G26960.1
Manes.03G046300.v6.1	0.146362	0.216445	pfam05721	PhyH	0
Manes.11G142300.v6.1	0.499866	0.425962	pfam06507	Auxin_resp	AT5G60450.1
Manes.13G102300.v6.1	0.207274	0.359648	pfam08240	ADH_N	AT4G37990.1
Manes.07G060700.v6.1	0.344989	0.471555	pfam00931	NB-ARC	AT4G27190.1
Manes.02G148500.v6.1	0.18135	0.24446	pfam00010	HLH	AT1G72210.1
Manes.05G177400.v6.1	0.414825	0.300967	pfam00134	Cyclin_N	AT4G34160.1
Manes.11G044600.v6.1	0.366901	0.196344	pfam01529	zf-DHHC	AT1G15260.1
Manes.17G064600.v6.1	0.299207	0.43663	pfam14432	DYW_deaminase	AT5G46460.1
Manes.13G126100.v6.1	0.452725	0.175475	pfam00106	adh_short	AT3G50560.1
Manes.02G214000.v6.1	0.186965	0.3659	pfam07765	KIP1	AT1G48405.1
Manes.02G084300.v6.1	0.44994	0.309684	pfam14897	EpsG	AT2G42870.1
Manes.08G031700.v6.1	0.470959	0.477775	pfam02536	mTERF	AT2G36000.1
Manes.06G053800.v6.1	0.314226	0.31645	pfam14432	DYW_deaminase	AT1G08070.1
Manes.03G139400.v6.1	0.466084	0.28549	pfam00067	p450	AT3G26330.1
Manes.06G094500.v6.1	0.427425	0.054091	pfam00010	HLH	AT3G47710.1
Manes.04G145900.v6.1	0.267427	0.283701	pfam11808	DUF3329	AT3G14060.1
Manes.02G157300.v6.1	0.33427	0.476988	pfam01553	Acyltransferase	AT1G02390.1
Manes.13G140600.v6.1	0.298786	0.144942	pfam00891	Methyltransf_2	AT4G35160.1
Manes.06G090600.v6.1	0.117557	0.263405	pfam13041	PPR_2	AT4G21065.1
Manes.12G023200.v6.1	0.399504	0.349298	pfam01384	PHO4	AT3G26570.2
Manes.11G077600.v6.1	0.345418	0.232241	pfam09863	DUF2090	AT1G12845.1
Manes.S062800.v6.1	0.380499	0.473591	pfam00931	NB-ARC	AT4G27190.1
Manes.09G047300.v6.1	0.423032	0.439394	pfam14541	TAXi_C	AT3G52500.1
Manes.05G166100.v6.1	0.323169	0.350156	pfam03099	BPL_LplA_LipB	AT4G31050.1
Manes.07G122100.v6.1	0.19685	0.0803317	pfam07526	POX	AT5G02030.1
Manes.02G071500.v6.1	0.319007	0.47894	pfam05701	WEMBL	AT1G66840.1
Manes.11G020400.v6.1	0.148882	0.17992	pfam00249	Myb_DNA-binding	AT5G14750.1
Manes.01G264200.v6.1	0.238877	0.222568	pfam07859	Abhydrolase_3	AT2G45610.1
Manes.10G097900.v6.1	0.484955	0.146068	pfam02519	Auxin_inducible	AT1G29460.1
Manes.05G168600.v6.1	0.448213	0.219549	pfam00249	Myb_DNA-binding	AT5G42630.1
Manes.07G117200.v6.1	0.375119	0.345762	pfam01357	Pollen_allerg_1	AT2G39700.1
Manes.10G035100.v6.1	0.422617	0.370769	pfam00646	F-box	AT2G39490.1
Manes.12G042700.v6.1	0.410107	0.106029	pfam00544	Pec_lyase_C	AT4G13710.1
Manes.01G099300.v6.1	0.307107	0.454568	pfam00027	cNMP_binding	AT5G15410.1
Manes.01G102000.v6.1	0.338873	0.238474	pfam05498	RALF	AT3G29780.1
Manes.S084300.v6.1	0.1391	0.227952	pfam02519	Auxin_inducible	AT1G29420.1
Manes.01G142200.v6.1	0.40373	0.142519	pfam08263	LRRNT_2	AT2G33170.1
Manes.02G118400.v6.1	0.456791	0.185742	pfam03660	PHF5	AT2G30000.1
Manes.05G167600.v6.1	0.192984	0.148732	pfam00067	p450	AT4G31970.1
Manes.03G113300.v6.1	0.386202	0.36685	pfam00106	adh_short	AT5G54190.1
Manes.17G083300.v6.1	0.319344	0.183986	pfam03171	2OG-FeII_Oxy	AT2G30840.1
Manes.12G041700.v6.1	0.287933	0.258746	pfam01594	UPF0118	0
Manes.09G111800.v6.1	0.331204	0.341619	pfam00498	FHA	AT2G21530.1
Manes.01G039300.v6.1	0.144904	0.0362888	pfam00856	SET	AT5G24330.1
Manes.10G130400.v6.1	0.401321	0.30135	pfam01151	ELO	AT3G06470.1
Manes.14G165100.v6.1	0.347896	0.235251	pfam00931	NB-ARC	AT5G36930.2
Manes.09G108400.v6.1	0.360341	0.484922	pfam02232	Alpha_TIF	AT2G04790.2
Manes.14G115700.v6.1	0.0880874	0.0586564	pfam03595	SLAC1	0
Manes.10G123700.v6.1	0.45016	0.306864	pfam14432	DYW_deaminase	AT5G13230.1
Manes.07G120800.v6.1	0.478849	0.381921	pfam02140	Gal_Lectin	0
Manes.12G107800.v6.1	0.139333	0.210197	pfam03140	DUF247	AT3G50120.1
Manes.07G140700.v6.1	0.256499	0.160292	pfam01357	Pollen_allerg_1	AT2G40610.1
Manes.03G125700.v6.1	0.47839	0.172239	pfam03181	BURP	AT5G25610.1
Manes.12G069100.v6.1	0.205192	0.36984	pfam03040	CemA	0
Manes.02G057500.v6.1	0.364615	0.0215365	pfam12819	Malectin_like	AT3G51550.1
Manes.01G091500.v6.1	0.188577	0.280614	pfam13041	PPR_2	AT2G36730.1
Manes.01G024100.v6.1	0.181724	0.180007	pfam06203	CCT	AT5G15840.1
Manes.08G149900.v6.1	0.406526	0.492569	pfam14432	DYW_deaminase	AT4G13650.1
Manes.07G067000.v6.1	0.312161	0.300438	pfam13855	LRR_8	AT4G06744.1
Manes.13G134100.v6.1	0.416865	0.423224	pfam02033	RBFA	0
Manes.05G125000.v6.1	0.468846	0.142078	pfam00332	Glyco_hydro_17	AT5G56590.1
Manes.05G168300.v6.1	0.0563969	0.28699	pfam00067	p450	AT4G31940.1
Manes.05G161000.v6.1	0.344295	0.0718535	pfam00692	dUTPase	AT3G46940.1
Manes.02G070400.v6.1	0.468354	0.195019	pfam01625	PMSR	AT4G25130.1
Manes.15G165200.v6.1	0.364412	0.274178	pfam13041	PPR_2	AT3G18840.2
Manes.16G005600.v6.1	0.466563	0.126784	pfam00394	Cu-oxidase	AT4G22010.1
Manes.13G061900.v6.1	0.0514535	0.358148	pfam04931	DNA_pol_phi	AT2G04480.1
Manes.03G008300.v6.1	0.430686	0.467256	pfam02298	Cu_bind_like	AT4G31840.1
Manes.06G113200.v6.1	0.183394	0.236841	pfam00544	Pec_lyase_C	AT5G63180.1
Manes.05G088700.v6.1	0.391781	0.253499	pfam13701	DDE_Tnp_1_4	AT1G23965.1
Manes.18G039400.v6.1	0.305664	0.355724	pfam00069	Pkinase	AT4G02630.1
Manes.13G123200.v6.1	0.453999	0.346074	pfam00082	Peptidase_S8	AT5G67090.1
Manes.06G004900.v6.1	0.0898062	0.115271	pfam14009	DUF4228	AT1G18290.1
Manes.11G049800.v6.1	0.448386	0.461539	pfam00916	Sulfate_transp	AT1G80310.1
Manes.05G033300.v6.1	0.416352	0.202558	pfam14630	ORC5_C	AT4G29910.1
Manes.12G088000.v6.1	0.386692	0.447737	pfam05694	SBP56	AT1G11120.2
Manes.02G101400.v6.1	0.373653	0.190886	pfam01095	Pectinesterase	AT5G19730.1
Manes.10G102200.v6.1	0.44476	0.300967	pfam03000	NPH3	AT5G64330.1
Manes.14G013500.v6.1	0.321858	0.0956944	pfam07714	Pkinase_Tyr	AT3G13690.1
Manes.13G069800.v6.1	0.183869	0.357748	pfam01762	Galactosyl_T	AT1G05170.2
Manes.01G183800.v6.1	0.402692	0.412858	pfam13178	DUF4005	AT3G49260.1
Manes.01G225300.v6.1	0.238234	0.148423	pfam13912	zf-C2H2_6	AT1G67030.1
Manes.03G135000.v6.1	0.412527	0.435469	pfam13813	MBOAT_2	AT5G55380.1
Manes.11G011100.v6.1	0.225332	0.0949258	pfam01764	Lipase_3	AT3G14360.1
Manes.07G073500.v6.1	0.204039	0.237604	pfam00201	UDPGT	AT4G34131.1
Manes.11G135800.v6.1	0.32993	0.280236	pfam00403	HMA	AT2G28660.1
Manes.02G101800.v6.1	0.441822	0.475296	pfam12681	Glyoxalase_2	AT1G15380.1
Manes.18G060100.v6.1	0.312749	0.201287	pfam14541	TAXi_C	AT1G09750.1
Manes.18G043200.v6.1	0.353365	0.0654146	pfam00134	Cyclin_N	AT5G43080.1
Manes.16G095800.v6.1	0.366819	0.117002	pfam13962	PGG	AT2G06040.1
Manes.09G043500.v6.1	0.280104	0.0946317	pfam00462	Glutaredoxin	AT5G06470.1
Manes.01G166100.v6.1	0.425059	0.390827	pfam03953	Tubulin_C	AT5G23860.1
Manes.01G099600.v6.1	0.315487	0.337071	pfam13041	PPR_2	AT4G21300.1
Manes.05G184000.v6.1	0.287721	0.452245	pfam00847	AP2	AT4G37750.1
Manes.13G105100.v6.1	0.462835	0.388181	pfam05300	DUF737	AT3G49645.1
Manes.15G104800.v6.1	0.292384	0.229737	pfam13041	PPR_2	AT5G66500.1
Manes.06G006200.v6.1	0.177492	0.0998617	pfam00067	p450	AT2G23180.1
Manes.04G088800.v6.1	0.433794	0.125423	pfam00010	HLH	AT4G34530.1
Manes.15G147500.v6.1	0.444261	0.406264	pfam13847	Methyltransf_31	AT4G34360.1
Manes.05G175700.v6.1	0.354308	0.124859	pfam00046	Homeobox	AT1G46480.1
Manes.18G069800.v6.1	0.373361	0.300357	pfam00150	Cellulase	0
Manes.03G137700.v6.1	0.175179	0.170118	pfam01199	Ribosomal_L34e	AT4G27240.1
Manes.04G025300.v6.1	0.492183	0.328921	pfam03195	DUF260	AT2G28500.1
Manes.12G035400.v6.1	0.331062	0.0376763	pfam03552	Cellulose_synt	AT1G04020.1
Manes.08G120200.v6.1	0.459117	0.482915	pfam12796	Ank_2	AT2G47450.1
Manes.12G128300.v6.1	0.32268	0.350975	pfam04770	ZF-HD_dimer	AT4G24660.1
Manes.01G002800.v6.1	0.251232	0.152902	pfam00759	Glyco_hydro_9	AT1G02800.1
Manes.05G112800.v6.1	0.33533	0.227172	pfam13041	PPR_2	AT1G33350.1
Manes.07G138200.v6.1	0.0894146	0.129105	pfam00505	HMG_box	AT5G05330.1
Manes.08G011900.v6.1	0.31498	0.181944	pfam00722	Glyco_hydro_16	AT2G36870.1
Manes.02G136700.v6.1	0.273807	0.238302	pfam00447	HSF_DNA-bind	AT1G46264.1
Manes.08G056400.v6.1	0.465471	0.430594	pfam03141	Methyltransf_29	AT5G04060.1
Manes.16G033400.v6.1	0.359631	0.096217	pfam00125	Histone	AT5G10390.1
Manes.13G043800.v6.1	0.447741	0.173831	pfam13639	zf-RING_2	AT2G40830.2
Manes.12G114400.v6.1	0.498731	0.239159	pfam00067	p450	AT4G37340.1
Manes.01G002300.v6.1	0.380477	0.426218	pfam05997	Nop52	AT5G24655.1
Manes.17G036200.v6.1	0.476809	0.315818	pfam00786	PBD	AT4G04900.1
Manes.13G043400.v6.1	0.469095	0.0837355	pfam03399	SAC3_GANP	0
Manes.03G000900.v6.1	0.424087	0.39784	pfam12056	DUF3537	AT2G21080.1
Manes.13G044500.v6.1	0.228552	0.0839843	pfam13414	TPR_11	AT5G48850.1
Manes.07G137900.v6.1	0.452502	0.484327	pfam03113	RSV_NS2	0
Manes.15G091000.v6.1	0.4245	0.340928	pfam03634	TCP	AT3G15030.1
Manes.13G110300.v6.1	0.41983	0.387884	pfam05637	Glyco_transf_34	AT2G22900.1
Manes.09G006800.v6.1	0.377331	0.133636	pfam00072	Response_reg	AT3G57040.1
Manes.05G066200.v6.1	0.454678	0.270349	pfam02536	mTERF	AT5G07900.1
Manes.06G027000.v6.1	0.353842	0.252726	pfam00188	CAP	AT4G30320.1
Manes.09G104100.v6.1	0.459776	0.444684	pfam00069	Pkinase	AT3G09010.1
Manes.03G072000.v6.1	0.407386	0.404806	pfam03873	RseA_C	0
Manes.13G073600.v6.1	0.476506	0.424957	pfam00069	Pkinase	AT4G03230.1
Manes.12G065100.v6.1	0.150066	0.356854	pfam12937	F-box-like	AT5G48170.1
Manes.04G143000.v6.1	0.369502	0.425007	pfam08381	BRX	AT3G14000.2
Manes.04G089000.v6.1	0.438051	0.334211	pfam07732	Cu-oxidase_3	AT5G03260.1
Manes.02G163600.v6.1	0.169427	0.225218	pfam13251	DUF4042	AT1G21790.1
Manes.08G094800.v6.1	0.19978	0.223382	pfam00010	HLH	AT5G01310.1
Manes.09G087300.v6.1	0.48216	0.0923319	pfam00106	adh_short	AT5G02540.1
Manes.12G022400.v6.1	0.393765	0.472685	pfam03000	NPH3	AT1G67900.1
Manes.08G067300.v6.1	0.341205	0.228441	pfam14383	VARLMGL	AT3G56810.1
Manes.05G206800.v6.1	0.248827	0.168399	pfam00082	Peptidase_S8	AT5G59810.1
Manes.06G084200.v6.1	0.453436	0.0480061	pfam08646	Rep_fac-A_C	AT5G08020.1
Manes.03G161500.v6.1	0.244957	0.103272	pfam05664	DUF810	AT2G33420.1
Manes.01G060800.v6.1	0.30506	0.256197	pfam00153	Mito_carr	AT4G11440.1
Manes.03G079300.v6.1	0.184454	0.166551	pfam13923	zf-C3HC4_2	AT1G53490.1
Manes.S101700.v6.1	0.356108	0.266757	pfam13833	EF-hand_8	AT5G54490.1
Manes.07G139600.v6.1	0.309493	0.153532	pfam02705	K_trans	AT2G40540.2
Manes.06G093600.v6.1	0.411744	0.127811	pfam11909	NdhN	AT1G18810.1
Manes.07G053500.v6.1	0.328427	0.198884	pfam00685	Sulfotransfer_1	AT1G18590.1
Manes.05G117600.v6.1	0.203559	0.366692	pfam04759	DUF617	AT5G23100.1
Manes.05G011500.v6.1	0.19343	0.283035	pfam00295	Glyco_hydro_28	AT1G02460.1
Manes.12G128000.v6.1	0.21546	0.258288	pfam00134	Cyclin_N	AT5G65420.1
Manes.12G070600.v6.1	0.254013	0.181876	pfam00759	Glyco_hydro_9	AT2G32990.1
Manes.07G134100.v6.1	0.399169	0.356248	pfam12796	Ank_2	AT5G57740.1
Manes.07G025000.v6.1	0.410411	0.490417	pfam07543	PGA2	AT4G24275.1
Manes.12G060400.v6.1	0.298248	0.401585	pfam02115	Rho_GDI	AT3G07880.1
Manes.01G092600.v6.1	0.233887	0.392108	pfam01357	Pollen_allerg_1	AT2G03090.1
Manes.10G143000.v6.1	0.272818	0.275472	pfam01554	MatE	AT3G08040.1
Manes.18G104300.v6.1	0.3829	0.377601	pfam08372	PRT_C	AT1G22610.1
Manes.03G134900.v6.1	0.369627	0.292903	pfam13813	MBOAT_2	AT5G55380.1
Manes.05G031300.v6.1	0.368922	0.298081	pfam00295	Glyco_hydro_28	AT3G61490.1
Manes.08G029700.v6.1	0.402426	0.458824	pfam13561	adh_short_C2	AT2G47140.1
Manes.01G060900.v6.1	0.207658	0.276513	pfam13650	Asp_protease_2	0
Manes.14G026400.v6.1	0.398144	0.266845	pfam13041	PPR_2	AT3G29230.1
Manes.18G066800.v6.1	0.298306	0.381914	pfam01454	MAGE	AT1G34770.1
Manes.04G082100.v6.1	0.0278983	0.0504095	pfam02519	Auxin_inducible	AT2G21220.1
Manes.03G178100.v6.1	0.455364	0.436597	pfam04844	Ovate	AT1G05420.1
Manes.01G195100.v6.1	0.436109	0.354227	pfam00072	Response_reg	AT1G59940.1
Manes.S034400.v6.1	0.0208395	0.211364	pfam00583	Acetyltransf_1	AT2G30090.1
Manes.02G209400.v6.1	0.436513	0.490722	pfam10674	Ycf54	AT5G58250.1
Manes.14G062400.v6.1	0.473008	0.181921	pfam04864	Alliinase_C	AT4G24670.2
Manes.17G035800.v6.1	0.250584	0.279531	pfam00722	Glyco_hydro_16	AT1G11545.1
Manes.06G153800.v6.1	0.370554	0.429719	pfam13041	PPR_2	AT5G52850.1
Manes.14G018600.v6.1	0.376789	0.19149	pfam03106	WRKY	AT4G11070.1
Manes.16G043400.v6.1	0.29747	0.255003	pfam04317	DUF463	0
Manes.13G134200.v6.1	0.321716	0.294385	pfam00931	NB-ARC	AT3G14460.1
Manes.17G119300.v6.1	0.257235	0.1179	pfam00664	ABC_membrane	AT3G28345.1
Manes.18G058700.v6.1	0.490132	0.442744	pfam05701	WEMBL	AT5G60930.1
Manes.13G126800.v6.1	0.41983	0.362131	pfam13041	PPR_2	AT4G18750.1
Manes.13G053500.v6.1	0.467105	0.185632	pfam09401	NSP10	AT4G12970.1
Manes.03G116800.v6.1	0.403428	0.245345	pfam00027	cNMP_binding	AT5G54250.2
Manes.06G081200.v6.1	0.444023	0.348848	pfam00270	DEAD	AT5G08110.1
Manes.09G155000.v6.1	0.461782	0.224851	pfam03638	TCR	AT4G14770.1
Manes.02G041300.v6.1	0.154268	0.127887	pfam00249	Myb_DNA-binding	AT3G13540.1
Manes.16G051700.v6.1	0.200613	0.256453	pfam13639	zf-RING_2	AT5G05280.1
Manes.04G159500.v6.1	0.343028	0.328619	pfam00854	PTR2	AT3G54450.1
Manes.06G119800.v6.1	0.335531	0.3909	pfam14346	DUF4398	AT3G48550.1
Manes.09G145800.v6.1	0.213394	0.0285611	pfam00657	Lipase_GDSL	AT5G33370.1
Manes.05G179300.v6.1	0.328068	0.400985	pfam00067	p450	AT4G37370.1
Manes.18G052800.v6.1	0.388564	0.319789	pfam05050	Methyltransf_21	AT2G26680.1
Manes.10G061800.v6.1	0.493048	0.0533114	pfam08661	Rep_fac-A_3	AT4G18590.1
Manes.10G115600.v6.1	0.400145	0.473755	pfam04669	Polysacc_synt_4	AT1G09610.1
Manes.06G047600.v6.1	0.0521299	0.0532263	pfam01034	Syndecan	0
Manes.12G054000.v6.1	0.259149	0.488717	pfam14368	LTP_2	AT5G48490.1
Manes.11G017200.v6.1	0.216395	0.286697	pfam00902	TatC	AT1G72490.1
Manes.16G114100.v6.1	0.152348	0.425712	pfam09418	DUF2009	AT2G46225.2
Manes.01G118400.v6.1	0.380298	0.397326	pfam05757	PsbQ	AT2G01918.1
Manes.17G122000.v6.1	0.354512	0.424083	.	.	0
Manes.08G119500.v6.1	0.392909	0.293026	pfam01789	PsbP	AT3G05410.2
Manes.06G039700.v6.1	0.426402	0.118064	pfam00400	WD40	AT1G80710.1
Manes.10G146600.v6.1	0.370334	0.228307	pfam00067	p450	AT5G36110.1
Manes.15G091100.v6.1	0.369602	0.331209	pfam02516	STT3	0
Manes.03G125400.v6.1	0.31072	0.100256	pfam00069	Pkinase	AT4G08850.1
Manes.17G023400.v6.1	0.130501	0.253072	pfam00010	HLH	AT3G28857.1
Manes.18G123400.v6.1	0.315198	0.237682	pfam00067	p450	AT5G24910.1
Manes.S088100.v6.1	0.405331	0.317448	pfam00344	SecY	AT3G07510.2
Manes.13G146300.v6.1	0.207595	0.0416119	pfam12906	RINGv	AT4G28310.1
Manes.02G027900.v6.1	0.150366	0.468672	pfam12730	ABC2_membrane_4	AT4G23020.2
Manes.06G136100.v6.1	0.0655113	0.310095	pfam04043	PMEI	AT5G62360.1
Manes.11G148600.v6.1	0.391364	0.165572	pfam00249	Myb_DNA-binding	AT1G72650.2
Manes.03G062200.v6.1	0.250867	0.28389	pfam08458	PH_2	AT4G14740.2
Manes.01G016100.v6.1	0.361925	0.477646	pfam07887	Calmodulin_bind	0
Manes.06G106600.v6.1	0.436396	0.184424	pfam00400	WD40	AT5G63010.1
Manes.17G116700.v6.1	0.376645	0.249627	pfam00866	Ring_hydroxyl_B	AT2G15020.1
Manes.02G131900.v6.1	0.200849	0.0723209	pfam01357	Pollen_allerg_1	AT2G39700.1
Manes.01G146900.v6.1	0.365739	0.497737	pfam00314	Thaumatin	AT4G38660.1
Manes.15G153000.v6.1	0.0424455	0.0365712	pfam00067	p450	AT5G14400.1
Manes.14G131200.v6.1	0.429058	0.305175	pfam11391	DUF2798	0
Manes.18G038600.v6.1	0.487231	0.242293	pfam00447	HSF_DNA-bind	AT1G46264.1
Manes.04G084700.v6.1	0.432773	0.270264	pfam01554	MatE	AT2G21340.1
Manes.12G091400.v6.1	0.187875	0.154084	pfam13839	PC-Esterase	AT2G42570.1
Manes.10G130500.v6.1	0.485029	0.393842	pfam01151	ELO	AT3G06470.1
Manes.12G111300.v6.1	0.438504	0.348461	pfam03000	NPH3	AT5G67385.1
Manes.03G048300.v6.1	0.40601	0.135665	pfam00069	Pkinase	AT1G68400.1
Manes.09G114000.v6.1	0.251696	0.238696	pfam05734	DUF832	0
Manes.05G119300.v6.1	0.251434	0.246488	pfam03634	TCP	AT3G18550.2
Manes.15G176000.v6.1	0.482761	0.340655	pfam10674	Ycf54	AT5G58250.1
Manes.14G031700.v6.1	0.425296	0.379166	pfam01120	Alpha_L_fucos	AT2G28100.1
Manes.08G007800.v6.1	0.397566	0.455518	pfam03641	Lysine_decarbox	AT2G37210.1
Manes.01G119300.v6.1	0.239106	0.131893	pfam01657	Stress-antifung	AT5G37660.1
Manes.01G188800.v6.1	0.12608	0.192074	pfam10328	7TM_GPCR_Srx	0
Manes.14G070800.v6.1	0.466903	0.475144	pfam02319	E2F_TDP	AT3G48160.2
Manes.18G014800.v6.1	0.402855	0.0728849	pfam00759	Glyco_hydro_9	AT1G75680.1
Manes.14G071400.v6.1	0.465007	0.223688	pfam02181	FH2	AT1G70140.1
Manes.10G134500.v6.1	0.277966	0.321155	pfam13813	MBOAT_2	AT3G51970.1
Manes.06G025200.v6.1	0.460817	0.176381	pfam00125	Histone	AT2G28720.1
Manes.10G011000.v6.1	0.314144	0.439396	pfam13839	PC-Esterase	AT3G55990.1
Manes.07G004300.v6.1	0.296955	0.274949	pfam13868	Trichoplein	AT3G52115.1
Manes.03G005600.v6.1	0.334848	0.287219	pfam02518	HATPase_c	AT5G10720.1
Manes.17G098500.v6.1	0.283757	0.126724	pfam04784	DUF547	AT5G66600.3
Manes.06G017300.v6.1	0.298625	0.291392	pfam07651	ANTH	AT1G33340.1
Manes.18G029800.v6.1	0.145309	0.126439	pfam04678	DUF607	AT5G42610.1
Manes.01G263700.v6.1	0.29188	0.407388	pfam00294	PfkB	AT5G51830.1
Manes.06G034900.v6.1	0.37155	0.291726	pfam02458	Transferase	AT5G48930.1
Manes.16G057600.v6.1	0.174822	0.0942828	pfam03936	Terpene_synth_C	AT5G23960.2
Manes.02G059700.v6.1	0.362723	0.391276	pfam01190	Pollen_Ole_e_I	AT5G15780.1
Manes.02G223100.v6.1	0.200895	0.390866	pfam13513	HEAT_EZ	AT2G07170.1
Manes.08G043500.v6.1	0.459082	0.34877	pfam08879	WRC	AT2G42040.1
Manes.10G137400.v6.1	0.28272	0.489923	pfam13855	LRR_8	AT2G34930.1
Manes.15G031800.v6.1	0.263119	0.393507	pfam13855	LRR_8	AT3G22800.1
Manes.17G041400.v6.1	0.497169	0.259044	pfam05546	She9_MDM33	AT1G11112.1
Manes.15G073200.v6.1	0.425395	0.45501	pfam10520	Kua-UEV1_localn	AT4G27030.1
Manes.13G149500.v6.1	0.368555	0.218732	pfam03321	GH3	AT4G03400.1
Manes.13G097500.v6.1	0.199648	0.053175	pfam00125	Histone	AT3G27360.1
Manes.S087100.v6.1	0.350347	0.239304	pfam05349	GATA-N	AT3G19570.2
Manes.06G102300.v6.1	0.185157	0.407128	pfam01843	DIL	AT5G40200.1
Manes.03G201300.v6.1	0.470613	0.314365	pfam00320	GATA	AT3G06740.1
Manes.08G078400.v6.1	0.437384	0.231412	pfam13041	PPR_2	AT3G53700.1
Manes.10G076200.v6.1	0.40159	0.476691	pfam13041	PPR_2	AT2G29760.1
Manes.01G058100.v6.1	0.429397	0.326176	pfam00295	Glyco_hydro_28	AT4G23500.1
Manes.15G138400.v6.1	0.455876	0.41154	pfam00191	Annexin	AT1G68090.1
Manes.16G020500.v6.1	0.441005	0.178532	pfam12084	DUF3561	AT4G21500.1
Manes.13G023400.v6.1	0.475049	0.419574	pfam00248	Aldo_ket_red	AT1G59960.1
Manes.05G094200.v6.1	0.384847	0.478208	pfam00509	Hemagglutinin	AT1G69970.2
Manes.03G063500.v6.1	0.354793	0.38254	pfam00069	Pkinase	AT3G53380.1
Manes.08G015100.v6.1	0.364545	0.33893	pfam13639	zf-RING_2	AT5G60710.1
Manes.14G045800.v6.1	0.467346	0.439094	pfam00450	Peptidase_S10	AT1G28110.1
Manes.02G008500.v6.1	0.428604	0.323736	pfam07738	Sad1_UNC	AT4G23950.1
Manes.12G016100.v6.1	0.356836	0.457041	pfam09588	YqaJ	AT1G67660.1
Manes.14G156200.v6.1	0.479322	0.403597	pfam14432	DYW_deaminase	AT3G14330.1
Manes.05G168400.v6.1	0.367062	0.388779	pfam00067	p450	AT4G31940.1
Manes.13G017800.v6.1	0.474022	0.434324	pfam00069	Pkinase	AT1G67510.1
Manes.05G090600.v6.1	0.168657	0.323048	pfam00134	Cyclin_N	AT1G70210.1
Manes.S001800.v6.1	0.487276	0.460885	pfam00759	Glyco_hydro_9	AT1G64390.1
Manes.04G161800.v6.1	0.442883	0.0390078	pfam00505	HMG_box	AT5G23420.1
Manes.06G148700.v6.1	0.369195	0.409931	pfam03283	PAE	AT5G23870.2
Manes.04G032100.v6.1	0.237074	0.100027	pfam00067	p450	AT5G24910.1
Manes.13G134400.v6.1	0.311494	0.497057	pfam00651	BTB	AT3G50780.1
Manes.07G130500.v6.1	0.285293	0.399342	pfam13041	PPR_2	AT1G62930.1
Manes.11G146600.v6.1	0.389926	0.33961	pfam00320	GATA	AT1G08010.1
Manes.01G106900.v6.1	0.212202	0.357964	pfam14432	DYW_deaminase	AT5G39680.1
Manes.14G034100.v6.1	0.352106	0.109635	pfam12697	Abhydrolase_6	AT4G25290.1
Manes.04G013500.v6.1	0.21864	0.1369	pfam07795	DUF1635	AT5G22930.1
Manes.10G153200.v6.1	0.286878	0.288095	pfam06075	DUF936	AT2G31920.1
Manes.11G088400.v6.1	0.350631	0.0799178	pfam02519	Auxin_inducible	AT2G21210.1
Manes.15G126700.v6.1	0.387426	0.415001	pfam00400	WD40	AT3G18060.1
Manes.S106500.v6.1	0.449014	0.132566	pfam00067	p450	AT3G52970.1
Manes.09G082500.v6.1	0.489423	0.323079	pfam00403	HMA	AT5G50740.3
Manes.03G126800.v6.1	0.112902	0.251513	pfam04824	Rad21_Rec8	AT4G21780.1
Manes.03G070500.v6.1	0.344224	0.473195	pfam01734	Patatin	AT3G54950.1
Manes.09G038600.v6.1	0.329664	0.450287	pfam13894	zf-C2H2_4	AT3G58070.1
Manes.S044900.v6.1	0.206778	0.124718	pfam09716	ETRAMP	AT5G64770.1
Manes.14G083300.v6.1	0.154768	0.212486	pfam12783	Sec7_N	0
Manes.06G141600.v6.1	0.220561	0.398128	pfam01486	K-box	AT5G62165.1
Manes.09G022300.v6.1	0.420918	0.450563	pfam00069	Pkinase	AT2G41820.1
Manes.11G149600.v6.1	0.31454	0.318103	pfam05140	ResB	0
Manes.11G044800.v6.1	0.289935	0.0779241	pfam14897	EpsG	AT1G15260.1
Manes.02G001300.v6.1	0.419969	0.446842	pfam04968	CHORD	0
Manes.04G080500.v6.1	0.232296	0.097573	pfam02519	Auxin_inducible	AT4G38840.1
Manes.02G157800.v6.1	0.496667	0.431726	pfam05633	DUF793	AT1G22030.1
Manes.07G076800.v6.1	0.285311	0.417552	pfam00134	Cyclin_N	AT4G34160.1
Manes.03G065100.v6.1	0.393031	0.315075	pfam00134	Cyclin_N	AT5G11300.1
Manes.04G057400.v6.1	0.123759	0.399643	pfam01107	MP	0
Manes.05G151600.v6.1	0.301937	0.0280157	pfam07250	Glyoxal_oxid_N	AT1G19900.1
Manes.10G052900.v6.1	0.473341	0.0674691	pfam00125	Histone	AT3G45980.1
Manes.05G106500.v6.1	0.246637	0.283427	pfam02171	Piwi	AT1G69440.1
Manes.06G107900.v6.1	0.241713	0.145873	pfam00069	Pkinase	AT5G56040.2
Manes.01G181900.v6.1	0.171292	0.404516	pfam00181	Ribosomal_L2	ATMG00560.1
Manes.17G041200.v6.1	0.338372	0.352856	pfam04220	YihI	AT1G11125.1
Manes.S109200.v6.1	0.288829	0.19756	pfam00274	Glycolytic	AT4G26530.2
Manes.05G170100.v6.1	#NAME?	0.0249727	pfam10214	Rrn6	AT2G26520.1
Manes.05G136200.v6.1	0.415305	0.447281	pfam02519	Auxin_inducible	AT1G76190.1
Manes.03G033400.v6.1	0.413794	0.190139	pfam01301	Glyco_hydro_35	AT3G13750.1
Manes.06G113800.v6.1	0.41905	0.155395	pfam08241	Methyltransf_11	AT1G24480.1
Manes.10G149600.v6.1	0.458547	0.360812	pfam00232	Glyco_hydro_1	AT5G44640.1
Manes.14G127400.v6.1	0.383761	0.380814	pfam13041	PPR_2	AT5G55740.1
Manes.14G031200.v6.1	0.221389	0.100263	pfam03171	2OG-FeII_Oxy	AT4G25420.1
Manes.13G101200.v6.1	0.436286	0.426504	pfam00201	UDPGT	AT2G22590.1
Manes.02G126400.v6.1	0.221108	0.342173	pfam09765	WD-3	0
Manes.10G085700.v6.1	0.0484483	0.175243	pfam00685	Sulfotransfer_1	AT1G18590.1
Manes.02G002000.v6.1	0.18678	0.0867209	pfam00759	Glyco_hydro_9	AT1G02800.1
Manes.10G074200.v6.1	0.341352	0.459122	pfam00931	NB-ARC	AT3G14470.1
Manes.04G112800.v6.1	0.494989	0.129537	pfam00487	FA_desaturase	AT3G15850.1
Manes.05G166000.v6.1	0.129423	0.449124	pfam04507	DUF576	0
Manes.10G048200.v6.1	0.291596	0.431451	pfam00583	Acetyltransf_1	AT2G39020.1
Manes.18G055000.v6.1	0.363536	0.283617	pfam00010	HLH	AT5G65640.1
Manes.10G098500.v6.1	0.452562	0.412699	pfam01576	Myosin_tail_1	AT4G38070.1
Manes.04G026100.v6.1	0.228754	0.319876	pfam00755	Carn_acyltransf	0
Manes.04G082000.v6.1	0.256951	0.0180403	pfam02519	Auxin_inducible	AT4G38840.1
Manes.07G132000.v6.1	0.148687	0.0902232	pfam02458	Transferase	AT2G40230.1
Manes.17G085600.v6.1	0.17081	0.167629	pfam01988	VIT1	AT2G01770.1
Manes.12G097600.v6.1	0.48563	0.413252	pfam05549	Allexi_40kDa	0
Manes.02G092700.v6.1	0.15331	0.263735	pfam01925	TauE	AT2G25737.1
Manes.09G188800.v6.1	0.369097	0.350068	pfam00067	p450	AT1G11680.1
Manes.09G021700.v6.1	0.252938	0.183902	pfam04468	PSP1	AT3G57440.1
Manes.15G160400.v6.1	0.326032	0.244473	pfam13041	PPR_2	AT5G06540.1
Manes.11G006400.v6.1	0.237082	0.402663	pfam01490	Aa_trans	0
Manes.15G075000.v6.1	0.220133	0.175482	pfam02747	PCNA_C	AT3G21710.2
Manes.18G081300.v6.1	0.467908	0.232258	pfam14432	DYW_deaminase	AT5G04780.1
Manes.01G213500.v6.1	0.443447	0.269734	pfam00810	ER_lumen_recept	0
Manes.01G102300.v6.1	0.243009	0.116673	pfam12842	DUF3819	AT3G29780.1
Manes.06G102400.v6.1	0.167669	0.403176	pfam13639	zf-RING_2	AT5G40250.1
Manes.01G077400.v6.1	0.303747	0.227797	pfam00156	Pribosyltran	AT4G12440.2
Manes.S041500.v6.1	0.157867	0.11594	pfam05910	DUF868	AT2G27770.1
Manes.10G106000.v6.1	0.317375	0.25789	pfam04770	ZF-HD_dimer	AT1G14440.1
Manes.14G171100.v6.1	0.363283	0.363976	pfam03547	Mem_trans	AT1G73590.1
Manes.06G091400.v6.1	0.283176	0.238379	pfam00504	Chloroa_b-bind	AT3G47470.1
Manes.01G152200.v6.1	0.251208	0.443379	pfam12799	LRR_4	AT3G07040.1
Manes.05G003900.v6.1	0.48593	0.491267	pfam13839	PC-Esterase	AT3G62390.1
Manes.03G071500.v6.1	0.319026	0.475964	pfam14432	DYW_deaminase	AT3G57430.1
Manes.11G020300.v6.1	0.185908	0.202199	pfam00847	AP2	AT1G72570.1
Manes.05G078000.v6.1	0.496515	0.327631	pfam04844	Ovate	AT2G32100.1
Manes.08G080300.v6.1	0.231741	0.125142	pfam01357	Pollen_allerg_1	AT2G39700.1
Manes.01G207400.v6.1	0.481948	0.410217	pfam01734	Patatin	AT3G63200.1
Manes.05G103400.v6.1	0.315423	0.457313	.	.	0
Manes.13G054300.v6.1	0.336464	0.40821	pfam15362	Enamelin	AT5G48500.1
Manes.16G034500.v6.1	0.28575	0.223776	pfam06834	TraU	AT4G18470.1
Manes.04G157300.v6.1	0.274363	0.105944	pfam05916	Sld5	AT3G55490.1
Manes.14G170800.v6.1	0.219197	0.143277	pfam00314	Thaumatin	AT1G18250.1
Manes.06G144700.v6.1	0.0786552	0.23084	pfam00067	p450	AT2G45550.1
Manes.06G013200.v6.1	0.37767	0.166217	pfam00082	Peptidase_S8	AT2G05920.1
Manes.06G099700.v6.1	0.113503	0.313589	pfam00072	Response_reg	AT3G48100.1
Manes.03G033100.v6.1	0.392474	0.393619	pfam10325	7TM_GPCR_Srz	AT5G56850.1
Manes.08G016900.v6.1	0.445377	0.270255	pfam00201	UDPGT	AT2G36780.1
Manes.04G123600.v6.1	0.477282	0.35867	pfam07556	DUF1538	AT1G52343.1
Manes.06G007500.v6.1	0.385244	0.491965	pfam13041	PPR_2	AT3G18020.1
Manes.06G168000.v6.1	0.409656	0.104842	pfam00125	Histone	AT1G09200.1
Manes.15G054200.v6.1	0.481063	0.128467	pfam07983	X8	AT4G13600.1
Manes.02G075900.v6.1	0.343415	0.398836	pfam03514	GRAS	AT1G66350.1
Manes.01G028000.v6.1	0.394553	0.230738	pfam15066	CAGE1	AT5G61040.1
Manes.13G104700.v6.1	0.427378	0.294461	pfam02309	AUX_IAA	AT5G65670.2
Manes.16G012800.v6.1	0.215653	0.450526	pfam02324	Glyco_hydro_70	AT4G21215.2
Manes.02G001500.v6.1	0.364421	0.413194	pfam08240	ADH_N	AT1G32780.1
Manes.16G016500.v6.1	0.136506	0.20243	pfam07136	DUF1385	AT5G54630.1
Manes.07G015400.v6.1	0.381551	0.468937	pfam00646	F-box	AT1G10780.1
Manes.15G080000.v6.1	0.430165	0.472313	pfam08357	SEFIR	0
Manes.04G081100.v6.1	0.48287	0.104271	pfam02519	Auxin_inducible	AT4G38840.1
Manes.17G081600.v6.1	0.430508	0.407003	pfam13041	PPR_2	AT2G01860.1
Manes.11G118000.v6.1	0.47365	0.328201	pfam00069	Pkinase	AT4G08850.1
Manes.17G090000.v6.1	0.0938977	0.0631291	pfam07651	ANTH	AT1G25240.1
Manes.13G048900.v6.1	0.349226	0.192135	pfam02724	CDC45	AT3G25100.1
Manes.03G153100.v6.1	0.160651	0.120694	pfam05938	Self-incomp_S1	AT3G24060.1
Manes.01G147600.v6.1	0.427169	0.375636	pfam00072	Response_reg	AT2G17820.1
Manes.16G006800.v6.1	0.362728	0.341046	pfam04520	Senescence_reg	AT4G04630.1
Manes.13G075800.v6.1	0.436519	0.439824	pfam00166	Cpn10	AT1G23100.1
Manes.14G061900.v6.1	0.477286	0.206765	pfam01564	Spermine_synth	AT5G63100.1
Manes.05G117900.v6.1	0.100216	0.377913	pfam00582	Usp	AT1G48960.1
Manes.05G154200.v6.1	0.0246424	0.133272	pfam09265	Cytokin-bind	AT1G75450.1
Manes.14G015700.v6.1	0.175168	0.494501	pfam13839	PC-Esterase	AT3G28150.1
Manes.12G053700.v6.1	0.373545	0.44986	pfam10192	GpcrRhopsn4	AT5G48500.1
Manes.13G146200.v6.1	0.289429	0.437395	pfam00150	Cellulase	AT2G20680.1
Manes.01G108300.v6.1	0.261441	0.164344	pfam12780	AAA_8	AT5G16030.1
Manes.04G097100.v6.1	0.403652	0.395602	pfam14432	DYW_deaminase	AT1G11290.1
Manes.03G041200.v6.1	0.160367	0.128353	pfam01699	Na_Ca_ex	AT1G54115.1
Manes.05G111600.v6.1	0.485993	0.270565	pfam12819	Malectin_like	AT3G51550.1
Manes.04G076400.v6.1	0.496179	0.259744	pfam08839	CDT1	AT3G54710.1
Manes.13G127400.v6.1	0.305751	0.291577	pfam15327	Tankyrase_bdg_C	AT5G66800.1
Manes.02G030600.v6.1	0.359018	0.1263	pfam00125	Histone	AT5G59970.1
Manes.13G123300.v6.1	0.0801311	0.131105	pfam03168	LEA_2	AT1G45688.1
Manes.09G169400.v6.1	0.441887	0.148519	pfam00125	Histone	AT5G27670.1
Manes.07G072100.v6.1	0.3766	0.180949	pfam00069	Pkinase	AT4G34220.1
Manes.03G039500.v6.1	0.41748	0.169102	pfam08879	WRC	AT3G13960.1
Manes.14G061200.v6.1	0.3988	0.29504	pfam00139	Lectin_legB	AT1G15530.1
Manes.13G000900.v6.1	0.249211	0.0967354	pfam02458	Transferase	AT1G65450.1
Manes.14G115200.v6.1	0.455471	0.34245	pfam00249	Myb_DNA-binding	AT5G52600.1
Manes.06G046900.v6.1	0.429206	0.446926	pfam10327	7TM_GPCR_Sri	0
Manes.03G021100.v6.1	0.335724	0.343828	pfam00083	Sugar_tr	AT3G18830.1
Manes.09G057700.v6.1	0.264573	0.34474	pfam00664	ABC_membrane	AT3G28860.1
Manes.14G089800.v6.1	0.435214	0.439057	pfam00201	UDPGT	AT1G73880.1
Manes.07G034100.v6.1	0.462409	0.413833	pfam07714	Pkinase_Tyr	AT1G70520.1
Manes.16G102100.v6.1	0.224078	0.328604	pfam01593	Amino_oxidase	AT4G29720.1
Manes.12G047700.v6.1	0.390164	0.250129	pfam05152	DUF705	AT3G25130.1
Manes.03G140300.v6.1	0.287117	0.300914	pfam14536	DUF4441	AT3G13130.1
Manes.06G121800.v6.1	0.210124	0.253313	pfam00106	adh_short	AT5G50770.1
Manes.05G161400.v6.1	0.469337	0.165968	pfam05320	Pox_RNA_Pol_19	AT3G56870.1
Manes.14G120800.v6.1	0.272681	0.415035	pfam04770	ZF-HD_dimer	AT5G11090.1
Manes.06G111200.v6.1	0.204932	0.291154	pfam05910	DUF868	AT4G12690.1
Manes.04G127000.v6.1	0.163639	0.246074	pfam00069	Pkinase	AT3G24550.1
Manes.02G061600.v6.1	0.372736	0.373761	pfam13041	PPR_2	AT3G02330.1
Manes.03G032300.v6.1	0.461004	0.359353	pfam00249	Myb_DNA-binding	AT5G56840.1
Manes.06G078000.v6.1	0.394436	0.479935	pfam00170	bZIP_1	AT3G30530.1
Manes.07G137800.v6.1	0.425058	0.438515	pfam00069	Pkinase	AT5G58380.1
Manes.12G064900.v6.1	0.373976	0.468649	pfam13855	LRR_8	AT1G45616.1
Manes.10G015900.v6.1	0.37132	0.21202	pfam00069	Pkinase	AT5G20480.1
Manes.02G147500.v6.1	0.354182	0.487978	pfam03853	YjeF_N	AT5G49970.1
Manes.12G089700.v6.1	0.344974	0.146687	pfam02405	Permease	AT1G28400.1
Manes.06G054300.v6.1	0.232744	0.273401	pfam04852	DUF640	AT1G07090.1
Manes.02G095200.v6.1	0.409532	0.434878	pfam03256	APC10	AT2G18290.1
Manes.14G066400.v6.1	0.38603	0.180797	pfam07714	Pkinase_Tyr	AT1G62400.1
Manes.S090200.v6.1	0.431492	0.463655	pfam00069	Pkinase	AT2G16750.1
Manes.14G079900.v6.1	0.0762424	0.242125	pfam01357	Pollen_allerg_1	AT2G03090.1
Manes.S089500.v6.1	#NAME?	0.0995935	pfam15449	Retinal	AT3G20180.1
Manes.03G078000.v6.1	0.450987	0.0151878	pfam13832	zf-HC5HC2H_2	AT3G14740.2
Manes.01G025900.v6.1	0.423083	0.290108	pfam15440	THRAP3_BCLAF1	AT1G69160.1
Manes.04G010500.v6.1	0.494615	0.28253	pfam03000	NPH3	AT3G44820.1
Manes.03G137900.v6.1	0.481229	0.395747	pfam14259	RRM_6	AT2G05160.1
Manes.03G018200.v6.1	0.193136	0.135719	pfam08392	FAE1_CUT1_RppA	AT2G26640.1
Manes.03G184300.v6.1	0.371735	0.131344	pfam00010	HLH	AT3G06120.1
Manes.02G211400.v6.1	0.461436	0.24919	pfam00069	Pkinase	AT5G58300.1
Manes.08G094600.v6.1	0.435782	0.280763	pfam13855	LRR_8	AT1G45616.1
Manes.02G035600.v6.1	0.187711	0.193286	pfam09794	Avl9	0
Manes.02G065700.v6.1	0.0408233	0.0473951	pfam14620	YPEB	0
Manes.12G100700.v6.1	0.252434	0.277076	pfam02892	zf-BED	0
Manes.18G123000.v6.1	0.365243	0.269281	pfam00067	p450	AT5G24910.1
Manes.02G084700.v6.1	0.360752	0.112028	pfam04450	BSP	AT2G42900.1
Manes.01G248900.v6.1	0.444441	0.324766	pfam03542	Tuberin	AT5G41761.1
Manes.15G008500.v6.1	0.401086	0.464628	pfam00407	Bet_v_1	AT1G24020.1
Manes.12G097500.v6.1	0.12683	0.254397	pfam03000	NPH3	AT5G66560.1
Manes.05G149200.v6.1	0.447214	0.348552	pfam01747	ATP-sulfurylase	AT1G19920.1
Manes.04G003000.v6.1	0.471846	0.467221	pfam11250	DUF3049	AT5G22390.1
Manes.01G133500.v6.1	0.166143	0.342929	pfam04844	Ovate	AT2G18500.1
Manes.14G076400.v6.1	0.288644	0.423192	pfam01344	Kelch_1	AT1G74510.2
Manes.09G169600.v6.1	0.179779	0.310288	pfam02181	FH2	AT3G05470.1
Manes.02G011100.v6.1	0.196988	0.428566	pfam05922	Inhibitor_I9	AT2G19170.1
Manes.05G024900.v6.1	0.380997	0.262127	pfam00249	Myb_DNA-binding	AT5G53200.1
Manes.03G005400.v6.1	0.192253	0.39588	pfam02362	B3	AT2G24645.1
Manes.S024500.v6.1	0.182003	0.35408	pfam00891	Methyltransf_2	AT4G35160.1
Manes.12G119900.v6.1	0.468579	0.456779	pfam00225	Kinesin	AT3G49650.1
Manes.11G127700.v6.1	0.301116	0.42678	pfam10105	DUF2344	0
Manes.04G021300.v6.1	0.498594	0.438558	pfam01363	FYVE	AT2G28410.1
Manes.13G114000.v6.1	0.366112	0.2686	pfam10222	DUF2152	AT5G67350.1
Manes.11G033800.v6.1	0.226062	0.143222	pfam01627	Hpt	AT3G16360.2
Manes.12G081800.v6.1	0.316998	0.277561	pfam00082	Peptidase_S8	AT2G04160.1
Manes.17G058800.v6.1	0.454099	0.320891	pfam00770	Peptidase_C5	AT1G29270.1
Manes.05G149400.v6.1	0.440902	0.0822162	pfam02519	Auxin_inducible	AT1G75580.1
Manes.01G142400.v6.1	0.106302	0.140331	pfam00067	p450	AT4G36220.1
Manes.07G078300.v6.1	0.347636	0.283969	pfam00069	Pkinase	AT1G60630.1
Manes.04G099800.v6.1	0.241304	0.427425	pfam01697	Glyco_transf_92	0
Manes.05G025200.v6.1	0.48648	0.279032	pfam13839	PC-Esterase	AT1G01430.1
Manes.01G170700.v6.1	0.225741	0.485379	pfam08137	DVL	AT5G59510.1
Manes.17G075300.v6.1	0.467487	0.362822	pfam00403	HMA	AT1G22990.1
Manes.15G023600.v6.1	0.383932	0.248404	pfam00010	HLH	AT3G06120.1
Manes.10G000900.v6.1	0.46017	0.310973	pfam01357	Pollen_allerg_1	AT2G40610.1
Manes.01G221400.v6.1	0.343509	0.323051	pfam12697	Abhydrolase_6	AT4G02340.1
Manes.14G080500.v6.1	0.0488524	0.301238	pfam00249	Myb_DNA-binding	AT5G61420.2
Manes.05G021000.v6.1	0.492887	0.192351	pfam07732	Cu-oxidase_3	AT2G46570.1
Manes.05G191400.v6.1	0.377134	0.229683	pfam01061	ABC2_membrane	AT5G53486.1
Manes.03G052100.v6.1	0.234108	0.376414	pfam13041	PPR_2	AT1G05670.2
Manes.01G249300.v6.1	0.41408	0.310644	pfam01634	HisG	AT2G16070.2
Manes.03G181900.v6.1	0.422957	0.166889	pfam11250	DUF3049	AT5G19260.1
Manes.05G101600.v6.1	0.481327	0.397321	pfam08449	UAA	AT1G14360.1
Manes.09G055700.v6.1	0.466078	0.403187	pfam03039	IL12	AT3G52740.1
Manes.01G053700.v6.1	0.254788	0.211797	pfam00106	adh_short	AT4G24050.1
Manes.06G121700.v6.1	0.416591	0.429797	pfam00106	adh_short	AT3G47350.1
Manes.02G166600.v6.1	0.295176	0.354064	pfam05097	DUF688	AT1G77400.1
Manes.05G145200.v6.1	0.471121	0.397331	pfam00005	ABC_tran	AT1G27940.1
Manes.15G130600.v6.1	0.353151	0.172122	pfam00407	Bet_v_1	AT1G70840.1
Manes.13G153000.v6.1	0.489425	0.403071	pfam05701	WEMBL	AT5G23610.2
Manes.04G102100.v6.1	0.278866	0.324577	pfam00069	Pkinase	AT1G80870.1
Manes.02G163100.v6.1	0.337512	0.177415	pfam00657	Lipase_GDSL	AT3G26430.1
Manes.05G130600.v6.1	0.260829	0.48878	pfam01755	Glyco_transf_25	0
Manes.01G041700.v6.1	0.483458	0.453051	pfam00069	Pkinase	AT1G73080.1
Manes.08G030300.v6.1	0.492488	0.301904	pfam00106	adh_short	AT3G51680.1
Manes.12G077500.v6.1	0.0477306	0.414747	pfam12730	ABC2_membrane_4	0
Manes.02G195600.v6.1	0.125728	0.455982	pfam04669	Polysacc_synt_4	AT4G09990.1
Manes.13G070300.v6.1	0.108759	0.196346	pfam06578	YscK	0
Manes.06G137600.v6.1	0.321817	0.179508	pfam03362	Herpes_UL47	AT1G12380.1
Manes.17G048900.v6.1	0.329159	0.109743	pfam11286	DUF3087	AT3G17950.1
Manes.15G114000.v6.1	0.352594	0.337735	pfam01369	Sec7	AT4G38200.1
Manes.18G047500.v6.1	0.381133	0.138524	pfam08574	DUF1762	AT4G33800.1
Manes.17G057600.v6.1	0.470381	0.381368	pfam00860	Xan_ur_permease	AT2G34190.1
Manes.17G075700.v6.1	0.427152	0.379794	pfam04564	U-box	AT1G23030.1
Manes.14G013600.v6.1	0.327511	0.111193	pfam00125	Histone	AT1G09200.1
Manes.16G001000.v6.1	0.210513	0.221625	pfam04720	DUF506	AT1G12030.1
Manes.05G053200.v6.1	0.112786	0.297253	pfam01184	Grp1_Fun34_YaaH	AT2G35680.1
Manes.17G102600.v6.1	0.370358	0.291968	pfam06813	Nodulin-like	AT3G01930.2
Manes.17G101900.v6.1	0.150089	0.155962	pfam00249	Myb_DNA-binding	AT1G75250.1
Manes.02G160700.v6.1	0.452133	0.258131	pfam03171	2OG-FeII_Oxy	AT5G08640.1
Manes.11G147600.v6.1	0.45346	0.341101	pfam02601	Exonuc_VII_L	0
Manes.03G114800.v6.1	0.316821	0.399845	pfam08241	Methyltransf_11	AT5G54400.1
Manes.08G037300.v6.1	0.232112	0.449052	pfam00069	Pkinase	AT2G38910.1
Manes.06G110400.v6.1	0.230825	0.234273	pfam05462	Dicty_CAR	AT4G24700.1
Manes.02G222100.v6.1	0.402769	0.210446	pfam00646	F-box	AT4G07400.1
Manes.S038900.v6.1	0.486948	0.348756	pfam00134	Cyclin_N	AT4G03270.1
Manes.14G123800.v6.1	0.399175	0.426308	pfam12819	Malectin_like	AT1G30570.1
Manes.15G140200.v6.1	0.314648	0.248246	pfam01153	Glypican	AT2G01990.1
Manes.10G149900.v6.1	0.452832	0.362639	pfam00232	Glyco_hydro_1	AT5G44640.1
Manes.15G101600.v6.1	0.343402	0.434026	pfam05701	WEMBL	AT1G17140.1
Manes.17G024100.v6.1	0.313057	0.462579	pfam03908	Sec20	AT2G35190.1
Manes.10G006500.v6.1	0.37107	0.166241	pfam00503	G-alpha	AT2G40435.1
Manes.08G041400.v6.1	0.334076	0.25164	pfam03018	Dirigent	AT1G58170.1
Manes.15G002000.v6.1	0.24084	0.357545	pfam04043	PMEI	AT3G17130.1
Manes.04G153500.v6.1	0.147387	0.295817	pfam10321	7TM_GPCR_Srt	0
Manes.07G118500.v6.1	0.325254	0.204183	pfam00314	Thaumatin	AT5G02140.1
Manes.08G106800.v6.1	0.484412	0.15881	pfam03283	PAE	AT3G05910.1
Manes.07G132200.v6.1	0.234864	0.301311	pfam03195	DUF260	AT3G11090.1
Manes.18G061400.v6.1	0.344317	0.266648	pfam02118	Srg	AT1G02070.1
Manes.11G134500.v6.1	0.0878254	0.352325	pfam05996	Fe_bilin_red	0
Manes.02G192500.v6.1	0.360241	0.0648243	pfam05097	DUF688	AT1G22680.1
Manes.06G075400.v6.1	0.435055	0.30932	pfam03124	EXS	AT1G68740.1
Manes.03G000800.v6.1	0.353948	0.348313	pfam00069	Pkinase	AT2G24370.1
Manes.04G132800.v6.1	0.408147	0.244349	pfam00320	GATA	AT4G32890.1
Manes.03G167100.v6.1	0.499559	0.37377	pfam05003	DUF668	AT3G23160.1
Manes.01G050700.v6.1	0.353913	0.409141	pfam03018	Dirigent	AT4G23690.1
Manes.13G027500.v6.1	0.4359	0.433509	pfam00069	Pkinase	AT1G60800.1
Manes.08G118900.v6.1	0.414924	0.254082	pfam00125	Histone	AT5G27670.1
Manes.11G146800.v6.1	0.160386	0.423113	pfam10174	Cast	0
Manes.12G110800.v6.1	0.226751	0.113287	pfam03514	GRAS	AT3G49950.1
Manes.09G094300.v6.1	0.306804	0.155615	pfam14543	TAXi_N	AT5G02190.1
Manes.14G120300.v6.1	0.27934	0.345589	pfam08847	DUF1817	AT2G47910.1
Manes.08G009400.v6.1	0.0190948	0.0676743	pfam08137	DVL	AT2G36985.1
Manes.15G071300.v6.1	0.170661	0.0771819	pfam13530	SCP2_2	AT5G54970.1
Manes.03G179600.v6.1	0.404748	0.440992	pfam00650	CRAL_TRIO	AT1G05370.1
Manes.09G055100.v6.1	0.258845	0.481243	pfam13041	PPR_2	AT2G36240.1
Manes.18G088900.v6.1	0.437103	0.429081	pfam00069	Pkinase	AT5G48940.1
Manes.12G025900.v6.1	0.392375	0.448821	pfam00069	Pkinase	AT1G60800.1
Manes.03G062400.v6.1	0.167521	0.0372729	pfam00400	WD40	AT3G50390.1
Manes.11G144800.v6.1	0.258902	0.212915	pfam13868	Trichoplein	AT2G28440.1
Manes.06G013500.v6.1	0.0645364	0.188563	pfam09811	Yae1_N	AT2G20830.2
Manes.14G013700.v6.1	0.38924	0.124719	pfam05701	WEMBL	AT5G12900.1
Manes.12G041000.v6.1	0.386858	0.239739	pfam12452	DUF3685	AT5G48830.1
Manes.04G091600.v6.1	0.407032	0.487566	pfam02138	Beach	AT1G12830.1
Manes.11G064400.v6.1	0.412056	0.374521	pfam05903	Peptidase_C97	AT1G80690.1
Manes.06G043900.v6.1	0.467254	0.22037	pfam07647	SAM_2	AT2G12462.1
Manes.08G122900.v6.1	0.282867	0.216821	pfam00069	Pkinase	AT1G54820.1
Manes.13G022500.v6.1	0.445071	0.453667	pfam00657	Lipase_GDSL	AT3G26430.1
Manes.07G056800.v6.1	0.0173305	0.203883	pfam14309	DUF4378	0
Manes.18G008500.v6.1	0.343555	0.161497	pfam01388	ARID	AT1G76110.1
Manes.S081100.v6.1	0.425717	0.465437	pfam14093	DUF4271	AT3G21710.2
Manes.09G044200.v6.1	0.374608	0.152119	pfam02045	CBFB_NFYA	AT5G06510.1
Manes.09G153200.v6.1	0.0985158	0.232108	pfam13041	PPR_2	AT3G18970.1
Manes.03G156200.v6.1	0.456102	0.41569	pfam15395	DUF4617	AT3G04310.1
Manes.14G081300.v6.1	0.276044	0.493235	pfam13041	PPR_2	AT5G66520.1
Manes.S055800.v6.1	0.457838	0.263358	pfam01357	Pollen_allerg_1	AT2G40610.1
Manes.01G221700.v6.1	0.246725	0.23864	pfam01095	Pectinesterase	AT4G02320.1
Manes.01G201500.v6.1	0.441449	0.202995	pfam00859	CTF_NFI	AT3G54650.1
Manes.05G140600.v6.1	0.36835	0.350166	pfam04734	Ceramidase_alk	AT2G38010.1
Manes.02G085900.v6.1	0.309215	0.363859	pfam05970	PIF1	0
Manes.16G065800.v6.1	0.421355	0.172264	pfam03936	Terpene_synth_C	AT1G79460.1
Manes.S017500.v6.1	0.261947	0.184083	pfam01712	dNK	0
Manes.18G144800.v6.1	0.158254	0.330523	pfam00141	peroxidase	AT5G05340.1
Manes.10G001000.v6.1	0.389823	0.40473	pfam00809	Pterin_bind	AT4G30000.1
Manes.01G093100.v6.1	0.350352	0.448866	pfam13041	PPR_2	AT5G15300.1
Manes.11G067400.v6.1	0.436683	0.46938	pfam00069	Pkinase	AT2G24130.1
Manes.16G115800.v6.1	0.0881861	0.188446	pfam04844	Ovate	AT5G19650.1
Manes.02G086800.v6.1	0.372972	0.22617	pfam13855	LRR_8	AT2G42800.1
Manes.16G111000.v6.1	0.283061	0.350149	pfam00847	AP2	AT5G11590.1
Manes.02G057000.v6.1	0.451583	0.445909	pfam12819	Malectin_like	AT3G51550.1
Manes.08G015200.v6.1	0.297345	0.489538	pfam04043	PMEI	AT3G05741.1
Manes.12G027100.v6.1	0.140159	0.163074	pfam00295	Glyco_hydro_28	AT1G60590.1
Manes.16G043000.v6.1	0.230845	0.271123	pfam00770	Peptidase_C5	0
Manes.02G154100.v6.1	0.177025	0.118402	pfam02358	Trehalose_PPase	AT1G35910.1
Manes.06G092500.v6.1	0.30797	0.37337	pfam04770	ZF-HD_dimer	AT1G74660.1
Manes.14G169100.v6.1	0.372014	0.0356885	pfam00867	XPG_I	AT1G18090.1
Manes.10G127200.v6.1	0.415848	0.252376	pfam13041	PPR_2	AT1G33350.1
Manes.03G112000.v6.1	0.343454	0.380764	pfam04515	Choline_transpo	AT3G15380.1
Manes.04G053700.v6.1	0.176727	0.409222	pfam15272	BBP1_C	0
Manes.11G050500.v6.1	0.384967	0.102104	pfam03171	2OG-FeII_Oxy	AT1G15550.1
Manes.09G143600.v6.1	0.367657	0.225529	pfam03222	Trp_Tyr_perm	AT2G33260.1
Manes.16G033200.v6.1	0.276902	0.23743	pfam00891	Methyltransf_2	AT4G35150.1
Manes.18G085500.v6.1	0.442963	0.394013	pfam12730	ABC2_membrane_4	AT4G19950.1
Manes.05G166800.v6.1	0.377085	0.382494	pfam00067	p450	AT4G31940.1
Manes.07G012000.v6.1	0.212726	0.269738	pfam07714	Pkinase_Tyr	AT3G51990.1
Manes.04G087900.v6.1	0.482539	0.364988	pfam01190	Pollen_Ole_e_I	AT5G41050.1
Manes.05G162500.v6.1	0.489206	0.218499	pfam00226	DnaJ	AT1G75100.1
Manes.04G008000.v6.1	0.211601	0.276142	pfam05910	DUF868	AT2G27770.1
Manes.18G021200.v6.1	0.317818	0.412264	pfam03798	TRAM_LAG1_CLN8	AT1G35180.1
Manes.14G156700.v6.1	0.373881	0.460049	pfam01106	NifU	AT4G25910.1
Manes.03G131400.v6.1	0.28964	0.487574	pfam00657	Lipase_GDSL	AT5G55050.1
Manes.01G212600.v6.1	0.170317	0.280648	pfam00620	RhoGAP	AT4G03100.1
Manes.13G108700.v6.1	0.492881	0.33726	pfam00891	Methyltransf_2	AT4G35160.1
Manes.08G084100.v6.1	0.484785	0.476743	pfam08153	NGP1NT	0
Manes.10G037300.v6.1	0.183785	0.238969	pfam09713	A_thal_3526	AT3G55240.1
Manes.09G164100.v6.1	0.317056	0.18072	pfam00010	HLH	AT1G72210.1
Manes.S061400.v6.1	0.499436	0.353211	pfam00722	Glyco_hydro_16	AT5G65730.1
Manes.06G167100.v6.1	0.363507	0.438021	pfam00069	Pkinase	AT3G20830.1
Manes.01G192500.v6.1	0.479072	0.45354	pfam00069	Pkinase	AT1G69910.1
Manes.16G033300.v6.1	0.148719	0.0874681	pfam00125	Histone	AT1G09200.1
Manes.09G179500.v6.1	0.479575	0.22338	pfam10332	DUF2418	0
Manes.05G203100.v6.1	0.288977	0.11942	pfam00069	Pkinase	AT5G56040.2
Manes.04G150700.v6.1	0.465686	0.328868	pfam03763	Remorin_C	AT1G53860.1
Manes.03G156600.v6.1	0.41413	0.368183	pfam02626	AHS2	AT2G32235.1
Manes.16G131900.v6.1	0.497403	0.397591	pfam06925	MGDG_synth	AT4G31780.2
Manes.17G014000.v6.1	0.38425	0.493151	pfam08426	ICE2	AT1G43760.1
Manes.15G014900.v6.1	0.102228	0.133751	pfam07714	Pkinase_Tyr	AT3G26700.1
Manes.18G084500.v6.1	0.46547	0.23697	pfam12638	Staygreen	AT1G44000.1
Manes.06G110300.v6.1	0.464116	0.249346	pfam14432	DYW_deaminase	AT1G08070.1
Manes.02G002100.v6.1	0.366956	0.408932	pfam13225	DUF4033	AT1G64680.1
Manes.02G100700.v6.1	0.340724	0.368373	pfam13855	LRR_8	AT5G66330.1
Manes.08G137600.v6.1	0.479987	0.398384	pfam00160	Pro_isomerase	AT3G56070.2
Manes.18G105600.v6.1	0.30279	0.355635	pfam00069	Pkinase	AT1G66920.1
Manes.01G174000.v6.1	0.490298	0.35428	pfam02466	Tim17	AT2G28900.1
Manes.13G042500.v6.1	0.27995	0.283199	pfam06090	Ins_P5_2-kin	0
Manes.08G045500.v6.1	0.0992785	0.255236	pfam05553	DUF761	AT3G57950.1
Manes.10G125100.v6.1	0.460675	0.224968	pfam13041	PPR_2	AT1G33350.1
Manes.12G111500.v6.1	0.48396	0.441343	pfam12222	PNGaseA	AT2G01410.1
Manes.03G173400.v6.1	0.448067	0.316353	pfam15621	PROL5-SMR	AT4G14723.1
Manes.03G155600.v6.1	0.0885271	0.213309	pfam14694	LINES_N	AT4G13540.1
Manes.09G010900.v6.1	0.41216	0.179704	pfam09265	Cytokin-bind	AT2G41510.1
Manes.14G087900.v6.1	0.304658	0.0772989	pfam00125	Histone	AT2G28740.1
Manes.06G104400.v6.1	0.37875	0.34328	pfam07714	Pkinase_Tyr	AT1G62400.1
Manes.06G095700.v6.1	0.281223	0.1627	pfam08372	PRT_C	AT1G74720.1
Manes.17G108900.v6.1	0.053478	0.15566	pfam00240	ubiquitin	AT5G14360.1
Manes.04G068700.v6.1	0.380261	0.353518	pfam07698	7TM-7TMR_HD	AT2G41990.1
Manes.08G104400.v6.1	0.384049	0.372469	pfam03547	Mem_trans	AT5G16530.1
Manes.14G096200.v6.1	0.175678	0.109186	pfam13855	LRR_8	AT1G68780.1
Manes.01G235800.v6.1	0.369399	0.353123	pfam00249	Myb_DNA-binding	AT4G01680.1
Manes.05G131900.v6.1	0.374533	0.202457	pfam00836	Stathmin	AT1G21500.1
Manes.15G192500.v6.1	0.4373	0.454823	pfam14432	DYW_deaminase	AT1G31920.1
Manes.08G010100.v6.1	0.0199326	0.185058	pfam02519	Auxin_inducible	AT3G09870.1
Manes.11G128800.v6.1	0.374418	0.436727	pfam03324	Herpes_HEPA	AT3G59680.2
Manes.09G180300.v6.1	0.357231	0.286488	pfam00069	Pkinase	AT1G56720.3
Manes.06G008700.v6.1	0.408591	0.334637	pfam01786	AOX	AT1G63300.1
Manes.01G099800.v6.1	0.429458	0.276771	pfam13041	PPR_2	AT3G29230.1
Manes.18G076400.v6.1	0.393255	0.305035	pfam00582	Usp	AT1G44760.1
Manes.17G117500.v6.1	0.24231	0.448759	pfam09726	Macoilin	AT3G28420.1
Manes.03G023900.v6.1	0.225851	0.295293	pfam01191	RNA_pol_Rpb5_C	AT3G22320.1
Manes.05G201700.v6.1	0.319151	0.184953	pfam05498	RALF	AT4G14010.1
Manes.08G024900.v6.1	0.359433	0.381775	pfam12280	BSMAP	AT3G52740.1
Manes.10G062200.v6.1	0.468705	0.426561	pfam01814	Hemerythrin	AT3G54290.1
Manes.02G147200.v6.1	0.3584	0.321616	pfam00069	Pkinase	AT1G28390.1
Manes.08G002100.v6.1	0.3862	0.387345	pfam14239	RRXRR	AT3G53470.1
Manes.15G128700.v6.1	0.401641	0.463163	pfam00166	Cpn10	AT1G23100.1
Manes.17G012700.v6.1	0.249417	0.219036	pfam13912	zf-C2H2_6	AT4G17810.1
Manes.08G087000.v6.1	0.281229	0.307422	pfam02453	Reticulon	AT3G54120.1
Manes.01G147100.v6.1	0.181683	0.276725	pfam05602	CLPTM1	0
Manes.14G154200.v6.1	0.0411879	0.035482	pfam05097	DUF688	AT4G25850.2
Manes.04G165400.v6.1	0.48927	0.439631	pfam00003	7tm_3	AT3G54500.1
Manes.08G010200.v6.1	0.276266	0.268185	pfam02519	Auxin_inducible	AT3G09870.1
Manes.13G133100.v6.1	0.257231	0.320404	pfam14009	DUF4228	AT2G23690.1
Manes.S024600.v6.1	0.404661	0.274155	pfam00891	Methyltransf_2	AT4G35160.1
Manes.05G145000.v6.1	0.334104	0.0772999	pfam13920	zf-C3HC4_3	AT4G35070.1
Manes.18G090500.v6.1	0.460282	0.0102732	pfam00282	Pyridoxal_deC	AT1G43710.1
Manes.15G061500.v6.1	0.360711	0.361574	pfam05859	Mis12	AT5G55610.1
Manes.16G034800.v6.1	0.173645	0.133097	pfam00141	peroxidase	AT2G34060.1
Manes.13G056700.v6.1	0.287675	0.331514	pfam00201	UDPGT	AT1G05675.1
Manes.03G027500.v6.1	0.0825924	0.195025	pfam14956	DUF4505	0
Manes.01G059700.v6.1	0.493148	0.470979	pfam00106	adh_short	AT4G11410.1
Manes.03G125800.v6.1	0.296321	0.113868	pfam03181	BURP	AT5G25610.1
Manes.12G116600.v6.1	0.254348	0.344258	pfam14009	DUF4228	AT1G64700.1
Manes.02G123900.v6.1	0.301058	0.466889	pfam12906	RINGv	AT5G05830.1
Manes.01G252600.v6.1	0.404016	0.0427693	pfam13639	zf-RING_2	AT4G01270.1
Manes.04G035600.v6.1	0.328724	0.460816	pfam03154	Atrophin-1	AT1G31350.1
Manes.13G070200.v6.1	0.355458	0.205801	pfam15262	DUF4592	AT5G54970.1
Manes.18G046600.v6.1	0.317897	0.286567	pfam13414	TPR_11	AT1G27460.1
Manes.03G176900.v6.1	0.202409	0.463713	pfam04570	DUF581	AT3G22550.1
Manes.11G104100.v6.1	0.46215	0.177897	pfam00069	Pkinase	AT1G21270.1
Manes.08G033100.v6.1	0.358019	0.413439	pfam13880	Acetyltransf_13	AT4G31400.1
Manes.08G026500.v6.1	0.326971	0.344272	pfam14432	DYW_deaminase	AT3G11460.1
Manes.17G078600.v6.1	0.418183	0.149199	pfam07782	DC_STAMP	AT2G01505.1
Manes.01G147500.v6.1	0.382781	0.305087	pfam00249	Myb_DNA-binding	AT4G38620.1
Manes.15G153100.v6.1	0.484045	0.290069	pfam08241	Methyltransf_11	AT3G01660.1
Manes.15G054300.v6.1	0.48232	0.425499	pfam00149	Metallophos	AT3G07130.1
Manes.06G068700.v6.1	0.388734	0.242055	pfam02574	S-methyl_trans	AT3G25900.1
Manes.15G008300.v6.1	0.240515	0.325013	pfam13920	zf-C3HC4_3	AT3G09770.1
Manes.14G077900.v6.1	0.436516	0.231421	pfam02704	GASA	AT1G74670.1
Manes.14G020300.v6.1	0.317588	0.245009	pfam03595	SLAC1	AT5G24030.1
Manes.06G119500.v6.1	0.398724	0.132961	pfam01753	zf-MYND	AT1G67340.1
Manes.16G078800.v6.1	0.25233	0.470617	pfam01941	AdoMet_Synthase	0
Manes.01G131300.v6.1	0.443144	0.313233	pfam01789	PsbP	AT1G06680.1
Manes.17G112600.v6.1	0.178628	0.0619143	pfam00400	WD40	AT3G27640.1
Manes.07G051800.v6.1	0.119221	0.451149	pfam13561	adh_short_C2	AT2G47140.1
Manes.13G039400.v6.1	0.327514	0.278731	pfam00082	Peptidase_S8	AT1G04110.1
Manes.08G167900.v6.1	0.379711	0.236056	pfam06697	DUF1191	AT3G08600.1
Manes.14G075200.v6.1	0.464753	0.485529	pfam00425	Chorismate_bind	AT1G18870.1
Manes.02G058500.v6.1	0.43456	0.179194	pfam00067	p450	AT5G38970.1
Manes.06G168200.v6.1	0.387003	0.134091	pfam00125	Histone	AT5G10400.1
Manes.17G002800.v6.1	0.140896	0.384354	pfam14111	DUF4283	0
Manes.01G209300.v6.1	0.385447	0.431357	pfam13340	DUF4096	0
Manes.14G056400.v6.1	0.218396	0.0620162	pfam00544	Pec_lyase_C	AT1G67750.1
Manes.01G004600.v6.1	0.180062	0.358906	pfam00274	Glycolytic	AT4G26530.2
Manes.02G057400.v6.1	0.29486	0.0931124	pfam06630	Exonuc_VIII	0
Manes.07G139700.v6.1	0.413306	0.47442	pfam14204	Ribosomal_L18_c	0
Manes.16G017400.v6.1	0.149627	0.395322	pfam01925	TauE	AT1G61740.1
Manes.01G130600.v6.1	0.42105	0.38451	pfam03188	Cytochrom_B561	AT4G18260.1
Manes.12G085400.v6.1	0.183374	0.128158	pfam15346	ARGLU	AT5G08240.1
Manes.08G004300.v6.1	0.499618	0.349083	pfam12072	DUF3552	AT3G09730.2
Manes.07G078400.v6.1	0.355702	0.213117	pfam00069	Pkinase	AT1G10850.1
Manes.15G036400.v6.1	0.474653	0.453276	pfam01544	CorA	AT5G64560.1
Manes.16G016800.v6.1	0.0789293	0.0681959	pfam00125	Histone	AT4G27230.1
Manes.08G011400.v6.1	0.494352	0.495656	pfam15175	SPATA24	AT5G03420.1
Manes.10G012800.v6.1	0.0875913	0.214943	pfam00388	PI-PLC-X	AT2G40116.1
Manes.10G073600.v6.1	0.279396	0.206055	pfam00069	Pkinase	AT4G34220.1
Manes.11G116600.v6.1	0.276865	0.319455	pfam00069	Pkinase	AT5G38280.1
Manes.06G128000.v6.1	0.241728	0.23798	pfam13041	PPR_2	AT5G61800.1
Manes.16G075800.v6.1	0.158783	0.151206	pfam00847	AP2	AT5G11590.1
Manes.17G041300.v6.1	0.298026	0.487026	pfam03619	Solute_trans_a	AT1G11120.2
Manes.12G019400.v6.1	0.440781	0.376034	pfam01237	Oxysterol_BP	AT1G13170.1
Manes.14G020600.v6.1	0.367463	0.357663	pfam14897	EpsG	AT5G52870.1
Manes.02G112700.v6.1	0.402166	0.490022	pfam10174	Cast	AT5G66030.1
Manes.16G054700.v6.1	0.219542	0.090452	pfam03936	Terpene_synth_C	AT5G23960.2
Manes.S015500.v6.1	0.376141	0.286807	pfam03106	WRKY	AT4G39410.1
Manes.08G124300.v6.1	0.0901715	0.172258	pfam00083	Sugar_tr	AT3G20460.1
Manes.13G106400.v6.1	0.271138	0.107123	pfam10325	7TM_GPCR_Srz	0
Manes.08G152600.v6.1	0.447293	0.389314	pfam02485	Branch	AT3G03690.1
Manes.04G111900.v6.1	0.21434	0.354584	pfam02845	CUE	AT5G32440.3
Manes.13G022600.v6.1	0.262919	0.344415	pfam05910	DUF868	AT4G12690.1
Manes.08G133600.v6.1	0.230977	0.427667	pfam00248	Aldo_ket_red	AT1G60680.1
Manes.10G048100.v6.1	0.140348	0.374617	pfam13705	TRC8_N	0
Manes.04G013900.v6.1	0.220223	0.267961	pfam00722	Glyco_hydro_16	AT2G36870.1
Manes.18G055400.v6.1	0.397672	0.334892	pfam14432	DYW_deaminase	AT1G11290.1
Manes.01G264100.v6.1	0.191639	0.0773955	pfam03171	2OG-FeII_Oxy	AT5G51810.1
Manes.03G144700.v6.1	0.193243	0.202775	pfam02458	Transferase	AT4G13840.1
Manes.04G146600.v6.1	0.486914	0.466325	pfam00092	VWA	AT1G72500.1
Manes.03G129300.v6.1	0.338264	0.143376	pfam13639	zf-RING_2	AT3G20395.1
Manes.09G100200.v6.1	0.400233	0.0507669	pfam05109	Herpes_BLLF1	AT2G37960.1
Manes.03G179300.v6.1	0.273143	0.347447	pfam01975	SurE	AT4G14930.1
Manes.13G152700.v6.1	0.276416	0.296403	pfam06075	DUF936	AT4G28100.1
Manes.06G167300.v6.1	0.472756	0.302346	pfam07944	DUF1680	AT5G12950.1
Manes.10G077800.v6.1	0.451925	0.232675	pfam04669	Polysacc_synt_4	AT5G67210.1
Manes.05G100000.v6.1	0.447304	0.240178	pfam03134	TB2_DP1_HVA22	AT1G69700.1
Manes.01G026200.v6.1	0.414226	0.310174	pfam05965	FYRC	AT1G26330.1
Manes.18G039200.v6.1	0.441515	0.149857	pfam00082	Peptidase_S8	AT5G67090.1
Manes.12G060300.v6.1	0.400163	0.393721	pfam02115	Rho_GDI	AT3G07880.1
Manes.11G012500.v6.1	0.42967	0.38206	pfam01095	Pectinesterase	AT3G14310.1
Manes.12G089800.v6.1	0.255784	0.162672	pfam00249	Myb_DNA-binding	AT2G20570.1
Manes.S047900.v6.1	0.199152	0.440672	pfam09128	RGS-like	0
Manes.05G107200.v6.1	0.21397	0.105114	pfam00141	peroxidase	AT2G41480.1
Manes.03G174300.v6.1	0.281002	0.0873079	pfam13855	LRR_8	AT3G22800.1
Manes.13G145200.v6.1	0.154462	0.258612	pfam00596	Aldolase_II	AT5G53850.2
Manes.15G174800.v6.1	0.361947	0.275693	pfam00046	Homeobox	AT5G15150.1
Manes.15G126300.v6.1	0.403064	0.412062	pfam13041	PPR_2	AT1G71060.1
Manes.S112100.v6.1	0.376851	0.217521	pfam00069	Pkinase	AT3G47110.1
Manes.10G005600.v6.1	0.384487	0.167027	pfam05097	DUF688	AT2G40475.1
Manes.11G005000.v6.1	0.471853	0.419042	pfam00891	Methyltransf_2	AT5G54160.1
Manes.12G073000.v6.1	0.421654	0.32678	pfam07876	Dabb	AT2G32500.1
Manes.03G063900.v6.1	0.432788	0.448229	pfam10326	7TM_GPCR_Str	AT3G15095.1
Manes.10G068600.v6.1	0.49741	0.349249	pfam00069	Pkinase	AT1G10850.1
Manes.12G144300.v6.1	0.406071	0.487981	pfam06455	NADH5_C	AT2G21860.1
Manes.10G098000.v6.1	0.0543665	0.0336706	pfam02519	Auxin_inducible	AT5G27780.1
Manes.18G139600.v6.1	0.455088	0.480325	pfam04859	DUF641	AT2G45260.1
Manes.01G197800.v6.1	0.0682308	0.121548	pfam00892	EamA	AT3G28050.1
Manes.14G049600.v6.1	0.265667	0.490948	pfam00510	COX3	0
Manes.03G121500.v6.1	0.373105	0.284808	pfam02931	Neur_chan_LBD	AT5G54630.1
Manes.11G155800.v6.1	0.310338	0.368624	pfam02791	DDT	AT5G35210.2
Manes.12G081900.v6.1	0.210309	0.335585	pfam09591	DUF2463	AT4G28100.1
Manes.10G136100.v6.1	0.46865	0.437192	pfam04515	Choline_transpo	AT5G13760.1
Manes.09G054700.v6.1	0.316549	0.249066	pfam00462	Glutaredoxin	AT5G03870.1
Manes.16G060000.v6.1	0.390085	0.184803	pfam03352	Adenine_glyco	AT5G44680.1
Manes.01G197400.v6.1	0.362018	0.225171	pfam13839	PC-Esterase	AT1G70230.1
Manes.03G106700.v6.1	0.310452	0.49075	pfam05424	Duffy_binding	AT1G53163.1
Manes.14G089200.v6.1	0.334759	0.318705	pfam10261	Scs3p	AT2G03810.3
Manes.05G046500.v6.1	0.300046	0.380549	pfam07714	Pkinase_Tyr	AT2G45340.1
Manes.15G042700.v6.1	0.282842	0.276183	pfam03819	MazG	AT3G25400.1
Manes.13G008100.v6.1	0.365337	0.366822	pfam00001	7tm_1	0
Manes.15G073800.v6.1	0.176081	0.194099	pfam01986	DUF123	AT4G21780.1
Manes.11G119200.v6.1	0.412523	0.233737	pfam00069	Pkinase	AT1G35710.1
Manes.17G121800.v6.1	0.305806	0.358239	pfam01673	Herpes_env	0
Manes.09G121200.v6.1	0.111193	0.330301	pfam00439	Bromodomain	AT1G20670.1
Manes.01G067700.v6.1	0.390466	0.49446	pfam14309	DUF4378	AT4G23020.2
Manes.03G184400.v6.1	0.397521	0.303737	pfam00403	HMA	AT5G19090.3
Manes.01G225000.v6.1	0.443404	0.415479	pfam00155	Aminotran_1_2	AT1G77670.1
Manes.16G137000.v6.1	0.103502	0.286023	pfam00516	GP120	0
Manes.06G052700.v6.1	0.411001	0.150521	pfam00067	p450	AT2G26710.1
Manes.15G137400.v6.1	0.342956	0.322398	pfam03924	CHASE	AT2G01830.2
Manes.01G138200.v6.1	0.372249	0.285785	pfam13041	PPR_2	AT3G47840.1
Manes.09G093200.v6.1	0.202855	0.0838743	pfam01357	Pollen_allerg_1	AT2G39700.1
Manes.09G058500.v6.1	0.343859	0.426136	pfam00069	Pkinase	AT2G36350.1
Manes.12G124900.v6.1	0.0568019	0.216711	pfam00201	UDPGT	0
Manes.12G078800.v6.1	0.292416	0.310139	pfam14432	DYW_deaminase	AT3G12770.1
Manes.16G033100.v6.1	0.17612	0.25607	pfam00891	Methyltransf_2	AT4G35160.1
Manes.01G037500.v6.1	0.360847	0.36467	pfam00581	Rhodanese	AT4G27700.1
Manes.12G096700.v6.1	0.407426	0.414254	pfam04784	DUF547	AT5G66600.3
Manes.18G027900.v6.1	0.407947	0.0237388	pfam00692	dUTPase	AT3G46940.1
Manes.16G109400.v6.1	0.441901	0.327804	pfam13178	DUF4005	AT3G16490.1
Manes.11G086600.v6.1	0.378122	0.0639907	pfam00010	HLH	AT4G34530.1
Manes.S079300.v6.1	0.140908	#NAME?	pfam14897	EpsG	0
Manes.04G094500.v6.1	0.476854	0.258202	pfam00293	NUDIX	AT1G12880.1
Manes.05G141300.v6.1	0.42616	0.470953	pfam04127	DFP	0
Manes.07G139900.v6.1	0.312337	0.476253	pfam04479	RTA1	0
Manes.01G096600.v6.1	0.202098	0.112817	pfam00201	UDPGT	AT3G02100.1
Manes.17G034200.v6.1	0.359571	0.197193	pfam00134	Cyclin_N	AT4G03270.1
Manes.05G075300.v6.1	0.496583	0.335409	pfam01657	Stress-antifung	AT5G48540.1
Manes.04G016900.v6.1	0.480598	0.485248	pfam02338	OTU	AT5G04250.1
Manes.03G112200.v6.1	0.294706	0.290055	pfam00501	AMP-binding	AT1G30520.1
Manes.01G268700.v6.1	0.459302	0.0644067	pfam14547	Hydrophob_seed	AT4G00165.1
Manes.01G069400.v6.1	0.312771	0.0543121	pfam00125	Histone	AT5G59690.1
Manes.07G097700.v6.1	0.233926	0.477431	pfam13966	zf-RVT	AT3G26855.1
Manes.07G123700.v6.1	0.192003	0.199664	pfam02271	UCR_14kD	0
Manes.10G145200.v6.1	0.138787	0.249838	pfam02458	Transferase	AT1G03940.1
Manes.09G050500.v6.1	0.449551	0.359838	pfam00106	adh_short	AT3G51680.1
Manes.01G029700.v6.1	0.438882	0.323177	pfam13041	PPR_2	AT2G20540.1
Manes.18G072600.v6.1	0.182555	0.141607	pfam15536	Toxin_58	AT1G36940.2
Manes.11G002500.v6.1	0.352286	0.396805	pfam03514	GRAS	AT1G50420.1
Manes.12G012100.v6.1	0.401986	0.0396988	pfam00808	CBFD_NFYB_HMF	AT5G43250.1
Manes.07G071900.v6.1	0.217709	0.12419	pfam00069	Pkinase	AT4G37250.1
Manes.08G173700.v6.1	0.350484	0.243044	pfam04844	Ovate	AT2G30400.1
Manes.12G008400.v6.1	0.499291	0.387008	pfam14033	DUF4246	AT5G13090.1
Manes.09G030900.v6.1	0.377548	0.196179	pfam00069	Pkinase	AT3G57830.1
Manes.13G053300.v6.1	0.392153	0.479669	pfam00071	Ras	AT1G05810.1
Manes.14G065700.v6.1	10.9501	10.2307	pfam12174	RST	AT5G62520.1
Manes.05G005600.v6.1	184.158	14.5127	pfam00050	Kazal_1	AT4G01575.1
Manes.S032200.v6.1	2.00452	2.28593	pfam04117	Mpv17_PMP22	AT4G33905.1
Manes.15G006500.v6.1	2.10699	2.68142	pfam01398	JAB	AT4G16144.1
Manes.09G034500.v6.1	2.87411	2.58737	pfam08743	Nse4_C	AT1G51130.1
Manes.08G055300.v6.1	32.4502	3.02929	pfam06472	ABC_membrane_2	0
Manes.06G109700.v6.1	8.25762	5.68109	pfam00564	PB1	AT3G48240.1
Manes.02G024700.v6.1	9.03478	6.90107	pfam14358	DUF4405	0
Manes.01G041200.v6.1	3.83575	3.14986	pfam02519	Auxin_inducible	AT2G46690.1
Manes.18G057100.v6.1	46.032	413.241	pfam14683	CBM-like	AT2G38465.1
Manes.07G119900.v6.1	6.63929	15.913	pfam07714	Pkinase_Tyr	AT5G02070.1
Manes.16G086600.v6.1	13.4266	5.97025	pfam07714	Pkinase_Tyr	AT2G05940.1
Manes.02G155600.v6.1	2.16719	2.02303	pfam07714	Pkinase_Tyr	AT4G21410.1
Manes.18G079600.v6.1	11.0244	7.85589	pfam02365	NAM	AT1G01720.1
Manes.05G096800.v6.1	2.7607	5.65834	pfam07063	DUF1338	AT1G07040.1
Manes.08G072600.v6.1	16.4006	18.6621	pfam03081	Exo70	AT3G09520.1
Manes.02G120500.v6.1	8.5149	4.62205	pfam00686	CBM_20	AT5G01260.2
Manes.12G031700.v6.1	8.82627	2.27167	pfam00847	AP2	AT3G23240.1
Manes.07G095300.v6.1	5.88507	10.5794	pfam15353	HECA	0
Manes.15G084700.v6.1	6.75487	3.45532	pfam02365	NAM	AT3G15510.1
Manes.02G129500.v6.1	18.3914	5.72509	pfam05109	Herpes_BLLF1	AT3G46750.1
Manes.08G061400.v6.1	2.4655	4.66855	pfam08711	Med26	AT5G05140.1
Manes.15G039700.v6.1	15.556	10.7932	pfam00847	AP2	AT3G23240.1
Manes.09G120400.v6.1	2.24757	5.00451	pfam03168	LEA_2	AT3G54200.1
Manes.04G121000.v6.1	2.14886	2.03853	pfam00005	ABC_tran	AT3G54540.1
Manes.01G264900.v6.1	4.58184	9.64413	pfam05483	SCP-1	AT3G60890.2
Manes.05G009300.v6.1	49.4015	5.17494	pfam00664	ABC_membrane	AT1G02520.1
Manes.09G009500.v6.1	101.625	522.823	pfam01601	Corona_S2	0
Manes.08G099100.v6.1	12.6967	4.82127	pfam14009	DUF4228	AT1G28190.1
Manes.02G070700.v6.1	2.74731	3.94053	pfam07722	Peptidase_C26	AT5G38200.1
Manes.06G024200.v6.1	5.99667	4.35727	pfam00335	Tetraspannin	AT2G23810.1
Manes.14G016800.v6.1	2.13971	3.07899	pfam13920	zf-C3HC4_3	AT3G12920.1
Manes.02G176600.v6.1	2.75001	2.45354	pfam05678	VQ	AT3G18690.1
Manes.14G099500.v6.1	4.00529	5.68041	pfam07859	Abhydrolase_3	AT1G68620.1
Manes.03G165100.v6.1	11.4866	3.73265	pfam00847	AP2	AT3G23240.1
Manes.15G117100.v6.1	2.17897	2.81686	pfam04059	RRM_2	AT1G29400.1
Manes.04G040000.v6.1	3.75389	4.27681	pfam00931	NB-ARC	AT3G46710.1
Manes.08G084400.v6.1	5.84957	25.6734	pfam13419	HAD_2	AT5G02230.2
Manes.11G063600.v6.1	19.2556	4.6225	pfam01061	ABC2_membrane	AT1G15520.1
Manes.05G154600.v6.1	2.51396	3.77528	pfam00179	UQ_con	AT5G42990.1
Manes.11G128100.v6.1	4.38388	5.69305	pfam00520	Ion_trans	AT4G28460.1
Manes.16G032700.v6.1	11.7901	11.0214	pfam00462	Glutaredoxin	AT1G28480.1
Manes.11G146400.v6.1	3.62947	91.272	pfam00240	ubiquitin	AT3G45180.1
Manes.07G061700.v6.1	107.36	47.4927	pfam13912	zf-C2H2_6	AT1G27730.1
Manes.09G157600.v6.1	2.51017	2.87362	pfam14381	EDR1	AT1G08720.1
Manes.13G137100.v6.1	2.68502	3.61619	pfam03514	GRAS	AT4G36710.1
Manes.01G233000.v6.1	4.01035	3.27253	pfam00930	DPPIV_N	AT4G01870.1
Manes.02G176900.v6.1	6.56352	32.5213	pfam04564	U-box	AT3G18710.1
Manes.12G087500.v6.1	5.24312	4.53669	pfam00847	AP2	AT2G20880.1
Manes.11G025400.v6.1	9.56306	2.70777	pfam00251	Glyco_hydro_32N	AT3G13790.1
Manes.01G059900.v6.1	5.92043	8.36817	pfam05109	Herpes_BLLF1	AT5G52430.1
Manes.02G159600.v6.1	3.84624	2.99466	pfam15499	Peptidase_C98	0
Manes.02G125800.v6.1	3.08512	2.44593	pfam13417	GST_N_3	AT2G29420.1
Manes.07G116500.v6.1	5.89075	77.8188	pfam00332	Glyco_hydro_17	AT3G55430.1
Manes.08G165000.v6.1	2.18737	5.32149	pfam02028	BCCT	0
Manes.15G137800.v6.1	4.32076	2.19675	pfam00722	Glyco_hydro_16	AT1G14720.1
Manes.13G122600.v6.1	6.42807	8.73676	pfam01596	Methyltransf_3	AT4G34050.1
Manes.12G159500.v6.1	2.73949	3.28831	pfam01764	Lipase_3	AT3G52430.1
Manes.15G093500.v6.1	Inf	Inf	pfam00004	AAA	AT3G50940.1
Manes.03G114400.v6.1	3.20299	5.15978	pfam15279	SOBP	AT3G15518.1
Manes.05G106900.v6.1	2.37734	4.85026	pfam03106	WRKY	AT2G03340.1
Manes.05G082100.v6.1	5.80777	11.1012	pfam00689	Cation_ATPase_C	AT3G63380.1
Manes.10G021200.v6.1	3.04393	2.9356	pfam04276	DUF443	AT2G39855.2
Manes.07G018200.v6.1	5.35975	43.7182	pfam00201	UDPGT	AT3G21760.1
Manes.11G063100.v6.1	3.08975	2.13166	pfam13001	Ecm29	AT1G80570.2
Manes.02G221900.v6.1	2.62871	2.37779	pfam03315	SDH_beta	0
Manes.08G145400.v6.1	9.52189	2.23335	pfam00847	AP2	AT5G19790.1
Manes.08G139200.v6.1	2.4783	8.95619	pfam01212	Beta_elim_lyase	AT1G08630.2
Manes.02G098700.v6.1	4.32837	5.20178	pfam12697	Abhydrolase_6	AT3G51000.1
Manes.02G166000.v6.1	10.0651	10.2441	pfam02365	NAM	AT1G01720.1
Manes.06G089400.v6.1	3.0831	4.36912	pfam12819	Malectin_like	AT5G61350.1
Manes.07G136900.v6.1	17.2543	2.51883	pfam07107	WI12	AT3G10985.1
Manes.14G054100.v6.1	3.24594	3.40396	pfam01274	Malate_synthase	AT5G03860.1
Manes.S043000.v6.1	19.1613	16.2447	pfam00232	Glyco_hydro_1	AT3G60140.1
Manes.06G132200.v6.1	4.23526	3.39838	pfam04511	DER1	AT4G29330.1
Manes.14G082600.v6.1	14.5926	3.78527	pfam00069	Pkinase	AT1G74360.1
Manes.18G009600.v6.1	3.75242	12.5288	pfam13639	zf-RING_2	AT2G17730.1
Manes.04G102600.v6.1	74.6425	17.3335	pfam03106	WRKY	AT1G80840.1
Manes.S064600.v6.1	Inf	Inf	pfam07195	FliD_C	0
Manes.06G089900.v6.1	41.1703	6.51597	pfam00854	PTR2	AT5G28470.1
Manes.03G121000.v6.1	4.76905	3.16947	pfam03514	GRAS	AT1G50600.1
Manes.11G156100.v6.1	Inf	Inf	pfam03479	DUF296	AT4G12080.1
Manes.10G007000.v6.1	2.63951	3.96662	pfam00565	SNase	AT2G40410.2
Manes.11G005600.v6.1	7.30625	4.91289	pfam03358	FMN_red	AT3G27890.1
Manes.05G192600.v6.1	8.84327	2.90644	pfam04639	Baculo_E56	0
Manes.03G207000.v6.1	16.5838	10.1271	pfam04043	PMEI	AT3G17130.1
Manes.16G098200.v6.1	4.19199	2.73063	pfam00221	Lyase_aromatic	AT3G10340.1
Manes.09G102800.v6.1	2.09256	2.26172	pfam02458	Transferase	AT5G01210.1
Manes.08G095800.v6.1	8.65218	2.34541	pfam00210	Ferritin	AT2G40300.1
Manes.08G152100.v6.1	2.89841	3.24649	pfam02701	zf-Dof	AT3G47500.1
Manes.07G066200.v6.1	4.41655	4.9377	pfam03321	GH3	AT2G14960.1
Manes.S042500.v6.1	20.7185	11.7373	pfam13904	DUF4207	AT2G42760.1
Manes.02G026500.v6.1	3.33588	8.03214	pfam01694	Rhomboid	AT1G63120.1
Manes.01G137900.v6.1	12.4069	3.97312	pfam04642	DUF601	0
Manes.18G095000.v6.1	2.74492	3.03276	pfam02443	Circo_capsid	AT1G22770.1
Manes.16G052300.v6.1	5.33484	10.0513	pfam01344	Kelch_1	AT1G15670.1
Manes.07G143800.v6.1	3.14928	2.46352	pfam13569	DUF4132	0
Manes.06G045500.v6.1	6.5041	5.26239	pfam09989	DUF2229	0
Manes.10G002200.v6.1	2.72586	3.31787	pfam03106	WRKY	AT3G56400.1
Manes.15G149600.v6.1	41.6234	13.3987	pfam00249	Myb_DNA-binding	AT5G40350.1
Manes.10G114800.v6.1	4.74423	2.39082	pfam00069	Pkinase	AT3G47570.1
Manes.14G136100.v6.1	9.68079	4.53193	pfam14009	DUF4228	AT5G17350.1
Manes.06G076500.v6.1	2.12781	2.79528	pfam06880	DUF1262	AT1G13480.1
Manes.08G029300.v6.1	3.55565	3.13706	pfam05577	Peptidase_S28	AT2G24280.1
Manes.10G117000.v6.1	3.23512	3.33833	pfam10320	7TM_GPCR_Srsx	0
Manes.08G030100.v6.1	15.3805	13.9993	pfam00106	adh_short	AT1G52340.1
Manes.02G046000.v6.1	12.2965	4.93622	pfam07891	DUF1666	AT5G39785.1
Manes.05G002200.v6.1	21.4525	18.4383	pfam01764	Lipase_3	AT1G02660.1
Manes.05G009400.v6.1	58.3494	9.26087	pfam00664	ABC_membrane	AT1G02520.1
Manes.05G160900.v6.1	2.88431	2.35419	pfam13639	zf-RING_2	AT3G10910.1
Manes.09G124900.v6.1	7.51949	5.99113	pfam02365	NAM	AT4G01550.1
Manes.04G161600.v6.1	2.72989	2.54991	pfam14559	TPR_19	AT3G19990.1
Manes.09G162300.v6.1	3.0865	2.094	pfam00083	Sugar_tr	AT1G08920.1
Manes.17G085300.v6.1	4.44928	21.9467	pfam01823	MACPF	AT1G14780.1
Manes.03G180000.v6.1	4.99229	10.5485	pfam00069	Pkinase	AT5G60900.1
Manes.15G145900.v6.1	4.4901	2.01918	pfam14899	DUF4492	AT2G15960.1
Manes.11G159000.v6.1	8.19451	8.67143	pfam01061	ABC2_membrane	AT2G36380.1
Manes.01G230000.v6.1	6.12263	5.09602	pfam03106	WRKY	AT2G47260.1
Manes.16G113200.v6.1	4.20075	23.9722	pfam04564	U-box	AT3G06880.2
Manes.02G118800.v6.1	5.23298	4.76006	pfam12796	Ank_2	AT5G58620.1
Manes.02G141900.v6.1	4.81917	2.72236	pfam00226	DnaJ	AT2G35795.1
Manes.11G043100.v6.1	5.64362	5.17904	pfam00069	Pkinase	AT3G24550.1
Manes.02G043200.v6.1	4.41204	5.96591	pfam01764	Lipase_3	AT4G16820.1
Manes.02G044700.v6.1	3.74131	76.6528	pfam03330	DPBB_1	AT4G17030.1
Manes.05G073600.v6.1	168.28	9382.68	.	.	AT3G63060.1
Manes.09G024500.v6.1	2.54524	3.35594	pfam00069	Pkinase	AT3G57530.1
Manes.14G100200.v6.1	13.0945	2.32968	pfam03398	Ist1	AT1G13340.1
Manes.02G199400.v6.1	14.9413	4.58574	pfam00069	Pkinase	AT5G47850.1
Manes.06G060400.v6.1	5.90474	16.9244	pfam13520	AA_permease_2	AT4G21120.1
Manes.11G005400.v6.1	6.61139	3.75215	pfam07422	s48_45	0
Manes.17G108600.v6.1	3.50902	2.62553	pfam02298	Cu_bind_like	AT5G14345.1
Manes.08G055000.v6.1	5.72385	2.55331	pfam04647	AgrB	AT2G41430.4
Manes.04G135000.v6.1	17.3613	3.12745	pfam15385	SARG	AT5G56550.1
Manes.S093500.v6.1	24.0825	83.0236	pfam04142	Nuc_sug_transp	AT4G37290.1
Manes.05G066700.v6.1	2.76964	3.09915	pfam00462	Glutaredoxin	AT3G62930.1
Manes.14G120700.v6.1	2.36973	3.68029	pfam13567	DUF4131	AT2G12400.1
Manes.05G193000.v6.1	2.05524	4.55528	pfam00173	Cyt-b5	AT5G53560.1
Manes.13G101600.v6.1	3.14284	2.02442	pfam13292	DXP_synthase_N	AT4G15560.1
Manes.08G039500.v6.1	2.53526	2.41525	pfam04147	Nop14	AT3G58480.1
Manes.01G212300.v6.1	2.49967	17.0091	pfam07859	Abhydrolase_3	AT3G63010.1
Manes.15G084800.v6.1	21.1852	20.9908	pfam02365	NAM	AT4G27410.2
Manes.03G139100.v6.1	5.95678	2.30118	pfam00067	p450	AT3G26300.1
Manes.17G108400.v6.1	94.6322	13.029	pfam04193	PQ-loop	AT5G40670.1
Manes.18G005000.v6.1	2.07123	2.82375	pfam07716	bZIP_2	AT1G42990.1
Manes.08G059100.v6.1	15.3206	4.28773	pfam12069	DUF3549	0
Manes.06G071700.v6.1	24.4254	2.27272	pfam02362	B3	AT1G25560.1
Manes.13G029600.v6.1	55.8983	40.3429	pfam12174	RST	AT1G23550.1
Manes.09G136300.v6.1	2.08577	2.83008	pfam02701	zf-Dof	AT3G47500.1
Manes.04G039500.v6.1	2.49846	2.94557	pfam08614	ATG16	AT1G06070.1
Manes.09G172500.v6.1	2.61618	7.68618	pfam08030	NAD_binding_6	AT5G47910.1
Manes.04G101600.v6.1	16.4269	5.73057	pfam00226	DnaJ	AT1G80920.1
Manes.03G055000.v6.1	5.06407	2.33945	pfam13639	zf-RING_2	AT5G20885.1
Manes.10G131200.v6.1	5.27896	7.95739	pfam10565	NMDAR2_C	AT2G20142.1
Manes.05G114100.v6.1	2.94053	2.43164	pfam03028	Dynein_heavy	0
Manes.01G171900.v6.1	23.5696	3.24878	pfam03514	GRAS	AT1G07530.1
Manes.12G072800.v6.1	2.21072	5.74845	pfam03106	WRKY	AT1G62300.1
Manes.16G134300.v6.1	2.55392	14.3771	pfam00067	p450	AT5G24910.1
Manes.09G078800.v6.1	4.39586	5.1063	pfam14093	DUF4271	0
Manes.10G135300.v6.1	23.7733	5.23274	pfam00800	PDT	AT1G08250.1
Manes.18G088100.v6.1	9.88285	6.88154	pfam04720	DUF506	AT1G77160.1
Manes.03G009500.v6.1	26.8323	5.20375	pfam03106	WRKY	AT1G80840.1
Manes.18G079700.v6.1	3.5127	4.26489	pfam13639	zf-RING_2	AT3G47180.1
Manes.01G055000.v6.1	14.7459	3.00818	pfam04490	Pox_T4_C	AT1G32928.1
Manes.17G101500.v6.1	58.605	2.44135	pfam03124	EXS	0
Manes.05G199600.v6.1	5.87122	2.07423	pfam00722	Glyco_hydro_16	AT3G23730.1
Manes.11G138900.v6.1	18.2317	34.606	pfam10318	7TM_GPCR_Srh	AT2G28570.1
Manes.03G194800.v6.1	2.56239	2.00331	pfam05498	RALF	AT4G15800.1
Manes.05G182700.v6.1	2.1152	4.54197	pfam07600	DUF1564	AT1G58420.1
Manes.07G031500.v6.1	8.70328	6.21014	pfam02458	Transferase	AT3G26040.1
Manes.S034100.v6.1	15.2327	5.04367	pfam07887	Calmodulin_bind	AT1G73805.1
Manes.14G094500.v6.1	3.38342	9.83134	pfam06880	DUF1262	AT1G13480.1
Manes.13G056600.v6.1	7.33874	20.5432	pfam00201	UDPGT	AT1G05675.1
Manes.05G017600.v6.1	8.55982	38.9043	pfam08392	FAE1_CUT1_RppA	AT1G01120.1
Manes.07G049200.v6.1	3.69858	20.4259	pfam00069	Pkinase	AT1G09970.1
Manes.06G011200.v6.1	5.0176	5.58271	pfam07714	Pkinase_Tyr	AT1G11340.1
Manes.07G004700.v6.1	3.23985	3.00414	pfam03798	TRAM_LAG1_CLN8	0
Manes.04G162900.v6.1	2.56508	3.15584	pfam05705	DUF829	AT3G19970.1
Manes.15G005500.v6.1	9.3308	8.45489	pfam02466	Tim17	AT4G16160.2
Manes.10G052500.v6.1	2.39261	3.87474	pfam02365	NAM	AT5G04410.1
Manes.13G009900.v6.1	4.57117	2.14254	pfam00902	TatC	AT1G27290.2
Manes.15G098500.v6.1	3.84857	8.65929	pfam14690	zf-ISL3	AT5G10695.1
Manes.17G043600.v6.1	3.89242	5.55866	pfam00571	CBS	AT5G53750.1
Manes.01G042300.v6.1	11.5094	10.4452	pfam14009	DUF4228	AT5G53710.1
Manes.15G132500.v6.1	9.81401	22.9556	pfam04749	PLAC8	AT1G14870.1
Manes.03G207500.v6.1	6.24167	11.2472	pfam13668	Ferritin_2	AT1G47980.1
Manes.06G008900.v6.1	7.31637	8.35934	pfam03492	Methyltransf_7	AT1G15125.1
Manes.07G046400.v6.1	6.42037	3.3761	pfam07714	Pkinase_Tyr	AT3G51550.1
Manes.02G206300.v6.1	10.822	327.81	pfam08240	ADH_N	AT4G39330.1
Manes.02G087400.v6.1	24.779	6.37223	pfam00447	HSF_DNA-bind	AT4G18880.1
Manes.06G080600.v6.1	2.81995	2.32651	pfam02701	zf-Dof	AT5G60850.1
Manes.07G016600.v6.1	Inf	Inf	pfam00069	Pkinase	AT3G47570.1
Manes.03G173200.v6.1	46.0599	2.94582	pfam00447	HSF_DNA-bind	AT3G22830.1
Manes.17G046700.v6.1	2.26621	4.01762	pfam10373	EST1_DNA_bind	AT1G28260.2
Manes.03G170300.v6.1	19.3184	5.49169	pfam00069	Pkinase	AT3G23000.1
Manes.14G163600.v6.1	4.19934	3.73146	pfam00892	EamA	AT4G30420.1
Manes.12G049700.v6.1	4.72699	6.26205	pfam08240	ADH_N	AT4G13010.1
Manes.09G086700.v6.1	2.23262	2.43674	pfam06423	GWT1	AT2G37480.1
Manes.16G073600.v6.1	2.2266	2.75741	pfam02309	AUX_IAA	AT3G16500.1
Manes.02G113900.v6.1	2.47421	2.01544	pfam02042	RWP-RK	AT4G35590.1
Manes.07G088500.v6.1	2.48709	2.12175	pfam12899	Glyco_hydro_100	AT5G22510.1
Manes.01G130200.v6.1	6.46637	2.69889	pfam03479	DUF296	AT2G42940.1
Manes.12G149600.v6.1	449.121	67.1608	pfam01494	FAD_binding_3	AT5G05320.1
Manes.04G036600.v6.1	11.8417	4.15652	pfam13597	NRDD	0
Manes.07G018800.v6.1	9.39852	4.80668	pfam00201	UDPGT	AT3G21780.1
Manes.16G086300.v6.1	4.52824	3.46403	pfam15060	PPDFL	AT5G21940.1
Manes.07G081100.v6.1	82.4142	5.80269	pfam00067	p450	AT4G19230.1
Manes.17G071200.v6.1	5.19734	6.21947	pfam03055	RPE65	AT1G30100.1
Manes.12G048600.v6.1	47.4121	39.5912	pfam00067	p450	AT4G31940.1
Manes.10G029900.v6.1	7.57306	2.17465	pfam00931	NB-ARC	AT4G27220.1
Manes.14G028900.v6.1	5.38015	2.55791	pfam04209	HgmA	0
Manes.15G057300.v6.1	9.38241	2.77051	pfam13639	zf-RING_2	AT5G55970.2
Manes.04G150300.v6.1	5.35618	2.19854	pfam04570	DUF581	AT1G53903.1
Manes.09G142300.v6.1	2.22347	2.76854	pfam14379	Myb_CC_LHEQLE	AT3G04030.3
Manes.06G150500.v6.1	164.304	3.67767	pfam03600	CitMHS	AT1G02260.1
Manes.01G138400.v6.1	2.45599	4.11009	pfam03492	Methyltransf_7	AT4G36470.1
Manes.11G005900.v6.1	2.04798	2.22352	pfam08263	LRRNT_2	AT2G34930.1
Manes.14G157100.v6.1	3.77496	8.35598	pfam14627	DUF4453	AT1G67920.1
Manes.02G112300.v6.1	6.81382	2.2499	pfam00501	AMP-binding	AT1G20560.1
Manes.18G037700.v6.1	2.82933	2.25507	pfam00069	Pkinase	AT5G09890.1
Manes.13G050200.v6.1	35.4007	12.6529	pfam00067	p450	AT4G31940.1
Manes.12G137000.v6.1	2.44397	6.35921	pfam01756	ACOX	AT5G65110.1
Manes.17G093100.v6.1	83.7515	13.6581	pfam00141	peroxidase	AT1G14550.1
Manes.06G012700.v6.1	4.83309	3.06741	pfam01786	AOX	AT5G64210.1
Manes.14G083800.v6.1	2.42651	2.06601	pfam05739	SNARE	AT5G61210.1
Manes.S050000.v6.1	28.8139	13.1045	pfam05678	VQ	AT3G22160.1
Manes.12G157200.v6.1	4.1429	3.91764	pfam05296	TAS2R	AT1G76980.2
Manes.06G165400.v6.1	3.5583	4.56368	pfam06471	NSP11	AT1G51260.1
Manes.08G112800.v6.1	6.97063	3.05874	pfam07887	Calmodulin_bind	AT5G26920.1
Manes.18G009300.v6.1	25.0293	2.40125	pfam09507	CDC27	AT1G76070.1
Manes.01G216100.v6.1	2.25543	3.03276	pfam00400	WD40	AT3G62770.1
Manes.13G013700.v6.1	6.7907	2.02093	pfam07859	Abhydrolase_3	AT5G14310.1
Manes.16G018900.v6.1	2.30751	3.75079	pfam07714	Pkinase_Tyr	AT1G11340.1
Manes.08G172000.v6.1	9.19865	326.305	pfam01357	Pollen_allerg_1	AT2G40610.1
Manes.10G028900.v6.1	5.73131	2.25538	pfam10320	7TM_GPCR_Srsx	AT5G02220.1
Manes.10G101800.v6.1	51.4291	2.75858	pfam00153	Mito_carr	AT4G24570.1
Manes.03G109200.v6.1	3.8847	18.4406	pfam02298	Cu_bind_like	AT5G53870.1
Manes.12G057400.v6.1	2.56541	2.15971	pfam03029	ATP_bind_1	AT4G12790.2
Manes.11G061800.v6.1	3.23473	8.66123	pfam03251	Tymo_45kd_70kd	AT5G11090.1
Manes.06G125300.v6.1	19.2451	9.76868	pfam00153	Mito_carr	AT5G14040.1
Manes.05G070500.v6.1	2.40478	5.29912	pfam07859	Abhydrolase_3	AT3G63010.1
Manes.01G027800.v6.1	4.0287	2.64825	pfam07168	Ureide_permease	AT2G03530.1
Manes.01G086100.v6.1	2.87657	2.18085	pfam01764	Lipase_3	AT4G16820.1
Manes.01G248300.v6.1	2.81957	2.70088	pfam04496	Herpes_UL35	AT3G61660.1
Manes.12G116300.v6.1	12.7479	49.014	pfam05678	VQ	AT2G22880.1
Manes.04G136200.v6.1	18.3926	2.36034	pfam03171	2OG-FeII_Oxy	AT1G52820.1
Manes.15G048400.v6.1	16.0252	6.42901	pfam00403	HMA	AT1G06330.1
Manes.05G187700.v6.1	5.31775	7.61183	pfam11677	DUF3273	0
Manes.16G090900.v6.1	2.10119	11.8229	pfam00847	AP2	AT1G74930.1
Manes.08G147600.v6.1	4.06395	3.98397	pfam13000	Acatn	0
Manes.10G015700.v6.1	26.7695	24.4427	pfam01494	FAD_binding_3	AT5G05320.1
Manes.06G061700.v6.1	2.35323	11.6286	pfam06026	Rib_5-P_isom_A	AT2G01290.1
Manes.13G068100.v6.1	10.005	2.87687	pfam03106	WRKY	AT1G62300.1
Manes.05G096900.v6.1	2.14877	2.78043	pfam01145	Band_7	AT5G62740.1
Manes.S070200.v6.1	16.9343	4.91786	pfam04526	DUF568	AT5G47530.1
Manes.18G093800.v6.1	29.1077	413.23	pfam00847	AP2	AT2G33710.2
Manes.04G029500.v6.1	42.125	14.2638	pfam03081	Exo70	AT5G59730.2
Manes.02G114800.v6.1	3.51844	9.90412	pfam01490	Aa_trans	AT4G38250.1
Manes.05G142500.v6.1	5.76226	5.64737	pfam10408	Ufd2P_core	AT1G76070.1
Manes.10G116700.v6.1	57.8025	13.6624	pfam07133	Merozoite_SPAM	0
Manes.03G043500.v6.1	20.4259	7.15809	pfam01252	Peptidase_A8	AT5G20790.1
Manes.02G097300.v6.1	8.10166	4.69337	pfam14363	AAA_assoc	AT2G18193.1
Manes.01G160300.v6.1	2.6894	4.04299	pfam04757	Pex2_Pex12	AT1G07175.1
Manes.16G003600.v6.1	Inf	Inf	pfam04885	Stig1	AT1G11925.1
Manes.07G118300.v6.1	6.35631	9.78354	pfam06547	DUF1117	AT3G46620.1
Manes.15G078300.v6.1	8.63895	2.2478	pfam03514	GRAS	AT5G48150.2
Manes.01G115000.v6.1	3.20386	4.38041	pfam00403	HMA	AT5G17450.1
Manes.06G159400.v6.1	2.07832	2.47325	pfam01645	Glu_synthase	AT5G53460.3
Manes.10G104700.v6.1	476.434	26.1553	pfam14226	DIOX_N	AT3G13610.1
Manes.08G147700.v6.1	2.68386	2.58566	pfam09348	DUF1990	0
Manes.07G008300.v6.1	2.6316	2.68833	pfam01593	Amino_oxidase	AT5G13700.1
Manes.01G232500.v6.1	2.01116	2.03415	pfam00069	Pkinase	AT5G26751.1
Manes.11G119700.v6.1	2.29071	2.45628	pfam01582	TIR	AT5G17680.1
Manes.18G101100.v6.1	3.44782	2.73721	pfam05922	Inhibitor_I9	AT1G71950.1
Manes.14G112400.v6.1	4.28286	2.84492	pfam00010	HLH	AT2G24260.1
Manes.01G260800.v6.1	15.931	17.498	pfam00168	C2	AT2G45760.1
Manes.11G085100.v6.1	2.62612	3.05164	pfam14363	AAA_assoc	AT3G50930.1
Manes.12G012400.v6.1	2.20323	2.96586	pfam04727	ELMO_CED12	AT1G67400.1
Manes.13G059500.v6.1	44.9561	4.7056	pfam00403	HMA	AT3G07600.1
Manes.07G111900.v6.1	12.806	3.25451	pfam13912	zf-C2H2_6	AT2G37430.1
Manes.02G178000.v6.1	23.6294	10.4273	pfam00067	p450	AT1G19630.1
Manes.02G194800.v6.1	2.34487	2.31652	pfam00249	Myb_DNA-binding	AT1G22640.1
Manes.09G148300.v6.1	2.69716	27.2977	pfam01212	Beta_elim_lyase	AT1G08630.3
Manes.18G105100.v6.1	4.47267	4.42595	pfam00854	PTR2	AT1G22540.1
Manes.10G003000.v6.1	6.22913	19.1846	pfam03962	Mnd1	AT5G05220.1
Manes.10G055400.v6.1	8.60034	8.20077	pfam00863	Peptidase_C4	0
Manes.09G170800.v6.1	2.6015	2.36081	pfam00838	TCTP	AT3G16640.1
Manes.17G062700.v6.1	21.2901	123.557	pfam04520	Senescence_reg	AT1G29640.1
Manes.14G003900.v6.1	3.60167	2.47743	pfam01513	NAD_kinase	AT3G21070.2
Manes.13G084400.v6.1	2.31675	3.71965	pfam07002	Copine	AT5G63970.1
Manes.01G248000.v6.1	2.99695	2.03475	pfam13839	PC-Esterase	AT1G01430.1
Manes.16G012000.v6.1	7.96868	2.27354	pfam00240	ubiquitin	AT4G05320.2
Manes.03G198300.v6.1	2.62157	2.21516	pfam04637	Herpes_pp85	AT3G06840.1
Manes.02G092000.v6.1	16.209	2.99584	pfam08783	DWNN	AT5G47430.1
Manes.12G013200.v6.1	4.40641	2.41507	pfam00709	Adenylsucc_synt	0
Manes.10G128700.v6.1	8.54508	24.9055	pfam14299	PP2	AT1G09155.1
Manes.05G203800.v6.1	2.069	7.2626	pfam00069	Pkinase	AT1G55610.1
Manes.03G083200.v6.1	2.08714	2.60703	pfam00069	Pkinase	AT1G16670.1
Manes.09G046100.v6.1	54.3895	6.56668	pfam02701	zf-Dof	AT3G52440.1
Manes.08G171600.v6.1	30.7872	6.12432	pfam02906	Fe_hyd_lg_C	0
Manes.S037700.v6.1	20.9232	6.0616	pfam03168	LEA_2	AT1G64065.1
Manes.02G078900.v6.1	Inf	Inf	pfam10395	Utp8	0
Manes.01G163200.v6.1	3.90667	2.96415	pfam13414	TPR_11	AT2G29670.1
Manes.03G091000.v6.1	211.842	4.01849	pfam03171	2OG-FeII_Oxy	AT1G78440.1
Manes.11G164500.v6.1	2.6226	5.73122	pfam12937	F-box-like	AT2G27310.1
Manes.16G119800.v6.1	17.8012	3.8652	pfam04826	Arm_2	AT2G23140.2
Manes.05G027000.v6.1	4.35883	3.58201	pfam01176	eIF-1a	AT2G04520.1
Manes.12G000800.v6.1	Inf	Inf	pfam13491	DUF4117	AT2G40070.1
Manes.01G206300.v6.1	6.8865	4.99969	pfam12051	DUF3533	AT4G14830.1
Manes.15G040400.v6.1	8.32449	6.76238	pfam00069	Pkinase	AT1G08650.1
Manes.12G020900.v6.1	10.9057	2.83419	pfam00782	DSPc	AT3G55270.1
Manes.14G056200.v6.1	2.94433	2.01862	pfam10168	Nup88	AT4G24800.2
Manes.07G104200.v6.1	2.05524	2.79865	pfam00179	UQ_con	AT3G20060.1
Manes.07G035000.v6.1	9.54306	4.27163	pfam03171	2OG-FeII_Oxy	AT3G13610.1
Manes.11G069400.v6.1	2.3037	7.30306	pfam13183	Fer4_8	AT2G24100.1
Manes.01G085400.v6.1	137.988	5.58232	pfam00847	AP2	AT4G17500.1
Manes.09G109700.v6.1	92.7457	15.3429	pfam00139	Lectin_legB	AT5G01550.1
Manes.09G067600.v6.1	3.57216	2.38702	pfam02338	OTU	AT5G03330.1
Manes.01G242300.v6.1	4.63853	119.3	pfam00046	Homeobox	AT2G46680.1
Manes.09G171100.v6.1	13.3288	33.6719	pfam04588	HIG_1_N	AT3G05550.1
Manes.11G051200.v6.1	3.61458	3.32703	pfam02309	AUX_IAA	AT1G04250.1
Manes.02G093500.v6.1	2.02594	2.01385	pfam00674	DUP	0
Manes.S091500.v6.1	31.597	2.03684	pfam00722	Glyco_hydro_16	0
Manes.18G066700.v6.1	3.71058	2.26439	pfam10476	DUF2448	0
Manes.09G098800.v6.1	3.81785	7.19805	pfam13417	GST_N_3	AT3G09270.1
Manes.08G123000.v6.1	2.56645	3.41862	pfam13639	zf-RING_2	AT3G05200.1
Manes.05G023700.v6.1	4.00764	2.56143	pfam00520	Ion_trans	AT5G53130.1
Manes.11G163400.v6.1	8.42819	6.49662	pfam02365	NAM	AT3G44350.2
Manes.12G063000.v6.1	20.0631	8.68197	pfam03188	Cytochrom_B561	AT5G35735.1
Manes.15G085500.v6.1	2.73032	4.31101	pfam12481	DUF3700	AT4G27450.1
Manes.01G062800.v6.1	22.049	4.10938	pfam00501	AMP-binding	AT3G48990.1
Manes.03G196400.v6.1	18.5538	12.7595	pfam01677	Herpes_UL7	0
Manes.03G180800.v6.1	10.0721	11.2055	pfam01252	Peptidase_A8	0
Manes.05G086300.v6.1	6.54454	10.4878	pfam00067	p450	AT5G63450.1
Manes.01G241500.v6.1	5.20576	2.52436	pfam13578	Methyltransf_24	AT1G01180.1
Manes.03G024400.v6.1	8.58475	3.46078	pfam00722	Glyco_hydro_16	AT4G28850.1
Manes.01G235900.v6.1	5.61714	9.87414	pfam01698	FLO_LFY	AT2G46940.1
Manes.09G171200.v6.1	Inf	Inf	pfam08392	FAE1_CUT1_RppA	AT1G71160.1
Manes.15G056300.v6.1	2.42768	3.63388	pfam00226	DnaJ	AT4G13830.2
Manes.10G024800.v6.1	6.50596	5.96097	pfam00696	AA_kinase	AT3G55610.1
Manes.11G066500.v6.1	85.1742	5.40607	pfam03106	WRKY	AT1G80840.1
Manes.18G040400.v6.1	2.60277	2.06069	pfam00847	AP2	AT3G50260.1
Manes.06G086900.v6.1	8.68873	4.73014	pfam03721	UDPG_MGDP_dh_N	AT3G29360.2
Manes.10G098600.v6.1	2.5427	2.02525	pfam12689	Acid_PPase	AT2G14110.1
Manes.14G070400.v6.1	2.95367	2.91825	pfam10679	DUF2491	AT1G19020.1
Manes.11G164900.v6.1	3.86407	4.68601	pfam00106	adh_short	AT1G52340.1
Manes.06G079700.v6.1	32.6739	6.72211	pfam00170	bZIP_1	AT5G60830.1
Manes.05G146400.v6.1	10.4655	2.69501	pfam00226	DnaJ	AT4G36040.1
Manes.09G144100.v6.1	6.88911	3.1649	pfam02365	NAM	AT3G04070.2
Manes.12G006800.v6.1	2.01288	2.05298	pfam00069	Pkinase	AT5G13160.1
Manes.10G101900.v6.1	53.4594	14.8596	pfam00153	Mito_carr	AT4G24570.1
Manes.02G198300.v6.1	3.09513	2.20887	pfam00650	CRAL_TRIO	AT1G72160.1
Manes.04G009100.v6.1	2.90123	5.25922	pfam09692	Arb1	AT2G27830.1
Manes.09G049900.v6.1	30.1154	25.4511	pfam00106	adh_short	AT1G52340.1
Manes.04G027500.v6.1	6.48339	5.65423	pfam07714	Pkinase_Tyr	AT1G07870.2
Manes.06G172200.v6.1	2.24835	2.79077	pfam13920	zf-C3HC4_3	AT3G12920.1
Manes.06G091300.v6.1	18.2975	33.896	pfam01357	Pollen_allerg_1	AT1G69530.3
Manes.01G156000.v6.1	5.6053	6.06394	pfam01490	Aa_trans	AT4G38250.1
Manes.15G037700.v6.1	2.15061	5.0141	pfam00072	Response_reg	AT3G23150.1
Manes.15G006100.v6.1	2.50544	5.45027	pfam00501	AMP-binding	AT3G16910.1
Manes.05G145900.v6.1	2.57152	3.70556	pfam00798	Arena_glycoprot	AT1G75810.1
Manes.01G156900.v6.1	2.60058	12.2963	pfam13639	zf-RING_2	AT1G20823.1
Manes.09G048100.v6.1	5.62171	8.64756	pfam00201	UDPGT	AT3G53150.1
Manes.03G155300.v6.1	91.9705	16.1895	pfam13417	GST_N_3	AT2G29420.1
Manes.07G114100.v6.1	2.26114	2.11449	pfam00012	HSP70	AT5G02500.1
Manes.05G114400.v6.1	3.66791	9.01996	pfam00249	Myb_DNA-binding	AT1G68320.1
Manes.07G073900.v6.1	2.86458	3.21171	pfam07714	Pkinase_Tyr	AT5G48380.1
Manes.05G197800.v6.1	3.59134	14.2459	pfam03492	Methyltransf_7	AT5G54165.1
Manes.07G001100.v6.1	3.22644	5.11166	pfam01453	B_lectin	AT5G60900.1
Manes.15G040700.v6.1	25.514	9.59088	pfam00249	Myb_DNA-binding	AT3G23250.1
Manes.15G118500.v6.1	4.27188	7.29672	pfam03151	TPT	AT4G18210.1
Manes.11G077100.v6.1	9.96869	6.82161	pfam04281	Tom22	0
Manes.15G052700.v6.1	2.71567	2.18557	pfam02234	CDI	AT2G32710.2
Manes.15G045800.v6.1	7.05694	3.45234	pfam04693	DDE_Tnp_2	AT4G21865.1
Manes.07G116400.v6.1	4.92603	7.51417	pfam02117	7TM_GPCR_Sra	AT2G20142.1
Manes.01G196200.v6.1	2.71445	2.66591	pfam01546	Peptidase_M20	AT5G56660.1
Manes.S086900.v6.1	7.64925	7.36376	pfam01494	FAD_binding_3	AT5G05320.1
Manes.05G130400.v6.1	3.01028	3.20752	pfam04640	PLATZ	AT1G21000.1
Manes.04G108500.v6.1	4.97544	4.2844	pfam14372	DUF4413	AT3G42170.1
Manes.04G031100.v6.1	191.481	8.212	pfam13912	zf-C2H2_6	AT2G37430.1
Manes.03G158000.v6.1	4.41313	12.2231	pfam13499	EF-hand_7	AT4G13440.1
Manes.04G121600.v6.1	14.1737	4.25936	pfam01344	Kelch_1	AT1G80440.1
Manes.04G084100.v6.1	9.69984	2.0725	pfam07798	DUF1640	AT2G16460.1
Manes.18G045300.v6.1	37.135	10.0539	pfam13912	zf-C2H2_6	AT1G27730.1
Manes.16G017700.v6.1	30.0141	19.3869	pfam01657	Stress-antifung	AT4G05200.1
Manes.09G130200.v6.1	21.1276	3.31041	pfam00067	p450	AT1G64940.1
Manes.13G139000.v6.1	20.0645	137.597	pfam05262	Borrelia_P83	AT2G42560.1
Manes.09G007400.v6.1	3.61097	5.36522	pfam13855	LRR_8	AT2G34930.1
Manes.17G091400.v6.1	10.8236	5.76741	pfam00282	Pyridoxal_deC	AT2G02010.1
Manes.03G106300.v6.1	5.88235	3.52474	pfam00847	AP2	AT3G15210.1
Manes.12G009300.v6.1	4.29409	3.20491	pfam00124	Photo_RC	AT1G27290.2
Manes.03G155200.v6.1	Inf	Inf	pfam13417	GST_N_3	AT2G29420.1
Manes.11G162000.v6.1	2.7027	2.69771	pfam00332	Glyco_hydro_17	AT2G27500.1
Manes.15G102000.v6.1	6.60219	1692.38	pfam03055	RPE65	AT3G14440.1
Manes.11G099100.v6.1	3.96096	3.41977	pfam03976	PPK2	AT3G52520.1
Manes.06G043000.v6.1	2.37936	4.95721	pfam00055	Laminin_N	AT5G11090.1
Manes.08G092000.v6.1	2.64124	6.14547	pfam13639	zf-RING_2	AT5G01520.1
Manes.14G151300.v6.1	41.9693	25.4495	pfam05553	DUF761	AT5G57510.1
Manes.01G206000.v6.1	3.80018	2.91869	pfam04570	DUF581	AT3G22550.1
Manes.01G027300.v6.1	39.469	11.7333	pfam01591	6PF2K	AT2G03630.1
Manes.05G087900.v6.1	7.3282	3.78913	pfam00982	Glyco_transf_20	AT1G23870.1
Manes.14G058200.v6.1	6.96968	17.3208	pfam13639	zf-RING_2	AT2G42360.1
Manes.05G180900.v6.1	61.939	13.1509	pfam13912	zf-C2H2_6	AT1G27730.1
Manes.10G000700.v6.1	17.1195	4.8846	pfam01661	Macro	AT2G40600.1
Manes.07G135300.v6.1	27.0775	12.6537	pfam00847	AP2	AT2G40340.1
Manes.03G096300.v6.1	3.84983	6.71207	pfam00139	Lectin_legB	AT5G06740.1
Manes.02G098100.v6.1	13.7725	8.56349	pfam00004	AAA	AT1G43910.1
Manes.04G155400.v6.1	2.50778	2.54114	pfam00031	Cystatin	AT3G12490.2
Manes.15G093300.v6.1	45.1083	10.4835	pfam00004	AAA	AT3G50940.1
Manes.04G133200.v6.1	2.71543	6.76175	pfam05553	DUF761	AT1G52140.1
Manes.03G130600.v6.1	5.01728	8.76299	pfam04535	DUF588	AT5G54980.1
Manes.11G025900.v6.1	2.11793	2.43204	pfam07544	Med9	AT1G55080.1
Manes.02G088900.v6.1	5.82686	2.50091	pfam00903	Glyoxalase	AT1G06570.1
Manes.10G117100.v6.1	8.20199	3.48717	pfam00564	PB1	AT5G49920.1
Manes.16G088900.v6.1	2.99102	93.6843	pfam03435	Saccharop_dh	AT4G33150.1
Manes.14G103400.v6.1	162.967	22.579	pfam05678	VQ	AT1G68450.1
Manes.14G119700.v6.1	2.64745	2.05439	pfam00627	UBA	AT2G12550.1
Manes.14G080300.v6.1	10.1065	11.3533	pfam06127	DUF962	AT1G18720.1
Manes.14G163700.v6.1	3.10255	3.09321	pfam00335	Tetraspannin	AT2G23810.1
Manes.12G039900.v6.1	3.48669	3.10577	pfam13417	GST_N_3	AT2G29420.1
Manes.18G089500.v6.1	2.7272	2.26423	pfam00139	Lectin_legB	AT5G42120.1
Manes.07G103200.v6.1	11.1676	19.3585	pfam14818	DUF4482	AT4G25030.1
Manes.13G135900.v6.1	3.96128	4.26794	pfam04678	DUF607	AT2G23790.1
Manes.12G022100.v6.1	8.46176	4.62262	pfam11013	DUF2851	0
Manes.01G036200.v6.1	2.32586	2.21882	pfam13639	zf-RING_2	AT1G26800.1
Manes.17G072100.v6.1	3.14557	2.34151	pfam00931	NB-ARC	AT3G14460.1
Manes.01G261600.v6.1	5.41889	2.86842	pfam03141	Methyltransf_29	AT4G00750.1
Manes.12G103600.v6.1	53.5726	3.09654	pfam00069	Pkinase	AT5G67080.1
Manes.12G129900.v6.1	4.76819	47.1864	pfam05340	DUF740	AT5G65300.1
Manes.14G151200.v6.1	27.354	34.2005	pfam01762	Galactosyl_T	AT5G57500.1
Manes.01G014200.v6.1	14.8222	6.0873	pfam02485	Branch	AT5G11730.1
Manes.03G150200.v6.1	2.31893	2.04412	pfam00108	Thiolase_N	AT2G33150.1
Manes.10G118500.v6.1	9.42733	7.63753	pfam01582	TIR	AT5G41540.1
Manes.05G113200.v6.1	78.8275	3.0325	pfam13833	EF-hand_8	AT5G42380.1
Manes.18G017100.v6.1	2.24472	4.29614	pfam12697	Abhydrolase_6	AT4G24160.1
Manes.07G033800.v6.1	3.35182	7.42228	pfam03060	NMO	AT5G64250.2
Manes.11G019100.v6.1	2.87796	3.13001	pfam00305	Lipoxygenase	AT1G17420.1
Manes.18G088600.v6.1	8.66035	47.8866	pfam00496	SBP_bac_5	AT1G78780.2
Manes.11G017900.v6.1	2.03782	5.87494	pfam00171	Aldedh	AT1G54100.1
Manes.13G097800.v6.1	7.26915	10.3997	pfam13639	zf-RING_2	AT3G05200.1
Manes.12G094900.v6.1	2.95149	4.92178	pfam14662	CCDC155	AT5G66985.1
Manes.02G150800.v6.1	6.46543	4.52674	pfam04674	Phi_1	AT5G64260.1
Manes.17G061600.v6.1	318.693	25.7074	pfam00854	PTR2	AT1G59740.1
Manes.16G044200.v6.1	3.61933	14.7799	pfam11721	Malectin	AT1G29750.2
Manes.12G087700.v6.1	8.87051	19.3604	pfam04612	T2SM	AT1G52855.1
Manes.12G037800.v6.1	2.42015	3.31331	pfam02309	AUX_IAA	AT4G28640.2
Manes.16G110200.v6.1	4.81738	7.37282	pfam05553	DUF761	AT4G29110.1
Manes.13G068400.v6.1	3.02855	2.2603	pfam00636	Ribonuclease_3	AT4G15417.1
Manes.02G042500.v6.1	34.6741	4.28008	pfam00847	AP2	AT4G17490.1
Manes.05G072600.v6.1	16.6717	19.9769	pfam03154	Atrophin-1	0
Manes.03G035800.v6.1	3.39555	3.54986	pfam04929	Herpes_DNAp_acc	0
Manes.16G090100.v6.1	2.08929	2.14511	pfam04366	DUF500	AT3G43230.1
Manes.10G020000.v6.1	6.20286	2.31179	pfam00011	HSP20	AT1G53540.1
Manes.17G063300.v6.1	4.92711	17.9289	pfam03171	2OG-FeII_Oxy	AT1G17020.1
Manes.18G046800.v6.1	609.496	8.06167	pfam10277	Frag1	AT1G59590.1
Manes.14G098000.v6.1	15.0654	2.05019	pfam02362	B3	AT1G25560.1
Manes.17G086300.v6.1	8.94091	30.1199	pfam04564	U-box	AT5G37490.1
Manes.08G007200.v6.1	3.21637	2.85083	pfam04520	Senescence_reg	AT5G03230.1
Manes.06G038400.v6.1	4.77487	2.41296	pfam07887	Calmodulin_bind	AT2G24300.2
Manes.01G048000.v6.1	49.0653	15.9359	pfam06760	DUF1221	AT1G64300.1
Manes.09G143800.v6.1	4.50269	2.77665	pfam02365	NAM	AT5G18270.1
Manes.18G127600.v6.1	2.8329	3.21788	pfam00069	Pkinase	AT3G47570.1
Manes.02G072000.v6.1	2.25825	2.16367	pfam01452	Rota_NSP4	AT2G47485.1
Manes.08G000500.v6.1	2.07184	2.98088	pfam13467	RHH_4	AT3G53490.1
Manes.03G203200.v6.1	8.08858	5.40202	pfam03514	GRAS	AT1G66350.1
Manes.12G022200.v6.1	29.1494	4.74539	pfam04724	Glyco_transf_17	AT1G12990.1
Manes.13G073800.v6.1	6.49924	29.6952	pfam00643	zf-B_box	AT3G21890.1
Manes.11G163500.v6.1	42.0217	5.42862	pfam00249	Myb_DNA-binding	AT5G08520.1
Manes.12G069800.v6.1	2.00998	3.27247	pfam10101	DUF2339	AT2G32970.2
Manes.04G036000.v6.1	2.05168	2.09287	pfam05915	DUF872	AT4G29850.1
Manes.08G034000.v6.1	8.72247	4.72033	pfam04564	U-box	AT3G11840.1
Manes.07G075700.v6.1	2.19692	3.15637	pfam01596	Methyltransf_3	AT4G34050.1
Manes.06G121200.v6.1	2.05366	9.83634	pfam03106	WRKY	AT5G13080.1
Manes.14G066500.v6.1	2.0804	2.45824	pfam04535	DUF588	AT2G36330.1
Manes.01G087800.v6.1	Inf	Inf	pfam01357	Pollen_allerg_1	AT4G17030.1
Manes.01G179200.v6.1	119.338	11.8252	pfam14009	DUF4228	AT5G12340.1
Manes.16G004100.v6.1	5.80822	12.2295	pfam03106	WRKY	AT1G62300.1
Manes.05G175800.v6.1	3.21382	2.03184	pfam00847	AP2	AT3G50260.1
Manes.11G033900.v6.1	2.76016	2.14867	pfam00249	Myb_DNA-binding	AT3G16350.1
Manes.07G033900.v6.1	2.97889	4.20068	pfam04674	Phi_1	AT5G64260.1
Manes.S045500.v6.1	5.85049	13.3323	pfam05795	Plasmodium_Vir	AT4G28460.1
Manes.15G008400.v6.1	8.43161	5.76131	pfam00407	Bet_v_1	AT1G24020.2
Manes.03G165300.v6.1	Inf	Inf	pfam00847	AP2	AT3G23230.1
Manes.06G003500.v6.1	2.57601	2.84157	pfam14480	DNA_pol3_a_NI	AT1G67920.1
Manes.05G176200.v6.1	2.22976	3.32284	pfam00622	SPRY	AT4G06536.1
Manes.14G059600.v6.1	38.4384	13.4275	pfam00067	p450	AT3G26300.1
Manes.04G100400.v6.1	Inf	Inf	pfam00069	Pkinase	AT1G79670.1
Manes.16G021200.v6.1	2.99603	3.69122	pfam00781	DAGK_cat	AT4G21540.1
Manes.10G019300.v6.1	2.63681	2.13609	pfam05620	DUF788	0
Manes.18G000700.v6.1	9.29152	27.8012	pfam14009	DUF4228	AT1G21010.1
Manes.05G100600.v6.1	2.15656	2.32357	pfam04116	FA_hydroxylase	AT1G14290.1
Manes.11G139200.v6.1	10.4355	2.71474	pfam14159	CAAD	AT2G28570.1
Manes.12G039200.v6.1	4.49346	2.20083	pfam05899	Cupin_3	AT3G04300.1
Manes.02G092400.v6.1	8.31619	7.4737	pfam00646	F-box	AT5G49610.1
Manes.05G072500.v6.1	Inf	Inf	pfam03231	Bunya_NS-S_2	0
Manes.11G069300.v6.1	73.0097	15.6522	pfam14897	EpsG	0
Manes.16G128900.v6.1	25.0709	7.13927	pfam03106	WRKY	AT1G80840.1
Manes.14G067800.v6.1	3.88686	3.41363	pfam00982	Glyco_transf_20	AT1G60140.1
Manes.10G040800.v6.1	11.3928	14.253	pfam02028	BCCT	0
Manes.15G125000.v6.1	4.43905	22.2122	pfam12948	MSP7_C	0
Manes.03G042500.v6.1	8.67249	52.3305	pfam06200	tify	AT1G74950.1
Manes.10G110100.v6.1	2.2565	2.66689	pfam00654	Voltage_CLC	AT5G49890.1
Manes.16G031400.v6.1	17.2841	7.03429	pfam13417	GST_N_3	AT1G78380.1
Manes.05G095200.v6.1	2.68804	5.25306	pfam04601	DUF569	AT1G27100.1
Manes.05G031400.v6.1	22.5334	4.30298	pfam00201	UDPGT	AT2G22590.1
Manes.09G042800.v6.1	6.08176	2.70801	pfam00009	GTP_EFTU	AT2G35900.1
Manes.12G087300.v6.1	4.46743	3.26287	pfam11955	PORR	0
Manes.12G114900.v6.1	8.38074	10.8064	pfam12288	CsoS2_M	AT4G37290.1
Manes.S061300.v6.1	3.72462	5.10745	pfam00046	Homeobox	AT4G37790.1
Manes.03G118300.v6.1	22.3023	2.01963	pfam13833	EF-hand_8	AT4G27280.1
Manes.10G053800.v6.1	3.20383	2.10306	pfam00400	WD40	AT3G52190.1
Manes.04G105200.v6.1	2.28504	3.4005	pfam00122	E1-E2_ATPase	AT1G80660.1
Manes.15G167300.v6.1	2.33601	2.58469	pfam07816	DUF1645	AT1G23710.1
Manes.05G143800.v6.1	2.42057	2.05397	pfam01357	Pollen_allerg_1	AT1G20190.1
Manes.02G097200.v6.1	8.56019	9.57294	pfam14363	AAA_assoc	AT2G18193.1
Manes.01G089900.v6.1	2.37053	4.4753	pfam14368	LTP_2	AT4G33550.2
Manes.15G074200.v6.1	2.79128	3.89004	pfam08477	Miro	AT5G54840.1
Manes.01G126100.v6.1	4.17226	3.35488	pfam00197	Kunitz_legume	AT1G73260.1
Manes.13G065700.v6.1	11.7292	2.24406	pfam03162	Y_phosphatase2	AT1G05000.1
Manes.09G097900.v6.1	9.14065	3.39814	pfam00854	PTR2	AT3G53960.1
Manes.01G255700.v6.1	2.70957	2.30088	pfam00303	Thymidylat_synt	AT2G45980.1
Manes.16G025700.v6.1	11.8779	2.57715	pfam12481	DUF3700	AT4G27450.1
Manes.05G142100.v6.1	2.38766	3.4301	pfam12357	PLD_C	AT4G35790.2
Manes.07G106700.v6.1	6.56732	21.9189	pfam01061	ABC2_membrane	AT3G55090.1
Manes.S051100.v6.1	3.87884	2.65231	pfam04674	Phi_1	AT5G64260.1
Manes.07G137300.v6.1	2.32044	3.03342	pfam01490	Aa_trans	AT3G56200.1
Manes.14G106000.v6.1	9.9857	2.2904	pfam00069	Pkinase	AT5G38280.1
Manes.15G001300.v6.1	10.4558	7.34722	pfam03106	WRKY	AT5G49520.1
Manes.15G121600.v6.1	4.1882	6.87743	pfam03171	2OG-FeII_Oxy	AT1G30040.1
Manes.16G019800.v6.1	6.21405	3.91908	pfam12609	DUF3774	AT4G05070.1
Manes.02G138500.v6.1	6.46841	5.22493	pfam00069	Pkinase	AT5G12180.1
Manes.15G044000.v6.1	7.13497	7.81938	pfam01593	Amino_oxidase	AT3G23510.1
Manes.13G148300.v6.1	5.40552	79.9144	pfam00847	AP2	AT2G20880.1
Manes.02G195800.v6.1	9.18188	6.92248	pfam11834	DUF3354	0
Manes.14G022100.v6.1	5.76841	2.86521	pfam00249	Myb_DNA-binding	AT5G52660.2
Manes.10G148600.v6.1	108.558	4.69112	pfam10327	7TM_GPCR_Sri	AT4G12735.1
Manes.15G033700.v6.1	4.83601	2.92937	pfam00122	E1-E2_ATPase	AT3G22910.1
Manes.12G051200.v6.1	21.7193	2.715	pfam04720	DUF506	AT3G07350.1
Manes.10G068500.v6.1	3.34761	3.20967	pfam00069	Pkinase	AT5G46330.1
Manes.S085700.v6.1	3.35948	5.47723	.	.	0
Manes.11G151600.v6.1	3.45084	2.14124	pfam03016	Exostosin	AT2G28110.1
Manes.12G062900.v6.1	11.6516	4.61763	pfam04526	DUF568	AT5G35735.1
Manes.13G138900.v6.1	2.03857	3.14749	pfam08435	Calici_coat_C	AT2G31090.1
Manes.13G044000.v6.1	16.2644	7.97037	pfam13912	zf-C2H2_6	AT5G48890.1
Manes.15G047700.v6.1	3.08729	17.0424	pfam01373	Glyco_hydro_14	AT3G23920.1
Manes.12G128900.v6.1	5.07967	9.90184	pfam12334	rOmpB	0
Manes.12G049000.v6.1	4.56447	4.15465	pfam00226	DnaJ	AT4G13830.2
Manes.08G073500.v6.1	29.9252	5.38628	pfam15323	Ashwin	0
Manes.11G034200.v6.1	14.4423	2.33237	pfam01061	ABC2_membrane	AT1G59870.1
Manes.08G093300.v6.1	2.07035	2.37606	pfam14144	DOG1	AT1G09950.1
Manes.17G076200.v6.1	Inf	Inf	pfam14009	DUF4228	AT2G01340.1
Manes.17G121400.v6.1	2.75129	3.42539	pfam09023	Staphostatin_B	0
Manes.09G148100.v6.1	5.03531	5.11623	pfam02373	JmjC	AT1G08620.1
Manes.05G186500.v6.1	4.32739	2.84619	pfam00069	Pkinase	AT1G09970.1
Manes.10G049800.v6.1	11.421	109.649	.	.	0
Manes.07G029200.v6.1	2.51803	18.9461	pfam13417	GST_N_3	AT2G29420.1
Manes.03G026800.v6.1	10.2739	6.46973	pfam00069	Pkinase	AT5G25930.1
Manes.02G203300.v6.1	19.5407	4.70317	pfam00069	Pkinase	AT3G47570.1
Manes.16G015000.v6.1	4.64552	3.47252	pfam00069	Pkinase	AT4G05200.1
Manes.15G032100.v6.1	3.66569	2.79929	pfam00916	Sulfate_transp	AT3G51895.1
Manes.01G148900.v6.1	5.1492	13.7832	pfam00403	HMA	AT5G66110.1
Manes.03G176700.v6.1	9.81673	2.67609	pfam13302	Acetyltransf_3	AT2G32030.1
Manes.10G090500.v6.1	Inf	Inf	pfam00069	Pkinase	AT1G09970.1
Manes.06G153100.v6.1	19.9043	2.44311	pfam00403	HMA	AT1G01490.1
Manes.15G014000.v6.1	4.05454	5.2101	pfam03171	2OG-FeII_Oxy	AT3G21420.1
Manes.02G064200.v6.1	8.90422	4.62963	pfam07698	7TM-7TMR_HD	0
Manes.05G078200.v6.1	Inf	Inf	pfam04927	SMP	AT3G22490.1
Manes.15G007700.v6.1	53.0042	7.0159	pfam00407	Bet_v_1	AT1G24020.1
Manes.01G076500.v6.1	2.63802	2.16602	pfam00251	Glyco_hydro_32N	AT1G12240.1
Manes.01G057100.v6.1	Inf	Inf	pfam03106	WRKY	AT4G01250.1
Manes.02G156900.v6.1	2.17112	2.18991	pfam13881	Rad60-SLD_2	AT1G22050.1
Manes.01G194800.v6.1	4.07956	4.35473	pfam00190	Cupin_1	AT1G10460.1
Manes.14G111300.v6.1	3.18366	6.62328	pfam00704	Glyco_hydro_18	AT4G19810.1
Manes.13G136800.v6.1	10.454	32.5108	pfam00046	Homeobox	AT2G18550.1
Manes.13G132000.v6.1	3.15745	2.0245	pfam00069	Pkinase	AT2G23450.2
Manes.07G063200.v6.1	2.66186	2.13722	pfam13639	zf-RING_2	AT1G49850.1
Manes.13G060000.v6.1	2.11557	28.9616	pfam13639	zf-RING_2	AT2G04240.1
Manes.17G102000.v6.1	11.5721	9.6124	pfam03106	WRKY	AT5G13080.1
Manes.07G035500.v6.1	4.57605	3.35145	pfam14264	Glucos_trans_II	AT5G64310.1
Manes.17G001500.v6.1	7.47867	3.09663	pfam11700	ATG22	0
Manes.10G125400.v6.1	4.59916	4.96822	pfam12796	Ank_2	AT4G10720.1
Manes.15G023900.v6.1	1007.29	3.49821	pfam14541	TAXi_C	AT1G03220.1
Manes.12G076900.v6.1	64.4062	5.89053	pfam03936	Terpene_synth_C	AT4G16730.1
Manes.17G092900.v6.1	Inf	Inf	pfam00141	peroxidase	AT1G14550.1
Manes.08G056600.v6.1	3.31842	5.51099	pfam12734	CYSTM	AT5G04080.1
Manes.14G138600.v6.1	13.3518	2.37919	pfam09804	DUF2347	AT5G25240.1
Manes.15G027900.v6.1	12.5777	9.57554	pfam13419	HAD_2	AT2G32150.1
Manes.09G119900.v6.1	2.6077	2.62373	pfam04525	Tub_2	AT2G38640.1
Manes.13G143500.v6.1	32.24	20.0349	pfam00847	AP2	AT5G44210.1
Manes.02G007800.v6.1	3.65241	6.30181	pfam10539	Dev_Cell_Death	AT5G42050.1
Manes.14G037800.v6.1	48.2835	7.92177	pfam15294	Leu_zip	AT5G51330.1
Manes.12G038300.v6.1	5.19894	2.12591	pfam03552	Cellulose_synt	AT2G20362.1
Manes.06G087300.v6.1	3.31932	3.9922	pfam05739	SNARE	AT5G61210.1
Manes.08G148000.v6.1	12.2762	10.9542	pfam02365	NAM	AT5G18270.1
Manes.05G105900.v6.1	3.18704	11.1594	pfam11360	DUF3110	AT1G13990.1
Manes.05G208400.v6.1	13.7753	3.54993	pfam10588	NADH-G_4Fe-4S_3	AT3G59900.1
Manes.16G024500.v6.1	2.47175	2.90691	pfam02701	zf-Dof	AT1G28310.2
Manes.11G054100.v6.1	3.94523	74.8149	pfam00903	Glyoxalase	AT1G80160.1
Manes.16G097600.v6.1	3.56934	2.04398	pfam03357	Snf7	AT2G06530.1
Manes.12G115900.v6.1	3.49646	7.26892	pfam03006	HlyIII	AT4G37680.2
Manes.03G092100.v6.1	2.66789	5.18741	pfam13855	LRR_8	AT3G14840.2
Manes.08G113500.v6.1	2.59107	2.24147	pfam13639	zf-RING_2	AT3G05670.1
Manes.17G051600.v6.1	21.1907	35.5293	pfam00847	AP2	AT3G23240.1
Manes.05G165900.v6.1	6.62166	4.74042	pfam03350	UPF0114	AT4G19390.1
Manes.03G167400.v6.1	4.64917	4.36932	pfam00072	Response_reg	AT3G23150.1
Manes.07G023100.v6.1	22.2661	3.92851	pfam02171	Piwi	AT1G31280.1
Manes.01G021300.v6.1	5.81072	30.3417	pfam14220	DUF4329	AT1G49000.1
Manes.17G029000.v6.1	10.698	12.7927	pfam03106	WRKY	AT1G62300.1
Manes.06G172900.v6.1	98.5494	20.9615	pfam02365	NAM	AT3G12910.1
Manes.04G108900.v6.1	15.0066	6.4455	pfam10373	EST1_DNA_bind	0
Manes.06G116800.v6.1	3.99776	2.5068	pfam00069	Pkinase	AT1G67580.1
Manes.06G165300.v6.1	4.99138	5.03325	pfam01891	CbiM	AT1G51260.1
Manes.06G062400.v6.1	6.00648	2.92336	pfam14009	DUF4228	AT3G03280.1
Manes.14G031400.v6.1	80.0753	3.29584	pfam07859	Abhydrolase_3	AT5G62180.1
Manes.01G151800.v6.1	4.06426	3.76281	pfam00581	Rhodanese	AT4G35770.1
Manes.17G103500.v6.1	5.60361	6.85618	pfam00067	p450	AT3G01900.1
Manes.18G127500.v6.1	2.11123	2.22366	pfam00069	Pkinase	AT3G47580.1
Manes.03G207600.v6.1	3.26403	127.458	pfam13668	Ferritin_2	AT1G47980.1
Manes.05G037600.v6.1	2.64134	4.34919	pfam00106	adh_short	AT3G61220.1
Manes.S076900.v6.1	2.26005	5.54916	pfam13025	DUF3886	0
Manes.07G123400.v6.1	Inf	Inf	pfam00201	UDPGT	AT1G22380.1
Manes.16G031500.v6.1	13.0258	8.59302	pfam13417	GST_N_3	AT1G78380.1
Manes.01G124500.v6.1	11.4148	2.32811	pfam01593	Amino_oxidase	AT1G65840.1
Manes.12G024800.v6.1	3.43056	3.57744	pfam04864	Alliinase_C	AT1G70560.1
Manes.17G066100.v6.1	8.11337	2.16987	pfam07885	Ion_trans_2	AT4G18160.1
Manes.18G013100.v6.1	2.51268	3.10278	pfam05003	DUF668	AT1G30755.1
Manes.05G198300.v6.1	6.92293	97.7459	pfam00031	Cystatin	AT2G31980.1
Manes.06G132700.v6.1	7.15813	3.59705	pfam00083	Sugar_tr	AT5G61520.1
Manes.08G139100.v6.1	34.6749	108.613	pfam03223	V-ATPase_C	0
Manes.04G135800.v6.1	3.5501	2.13413	pfam00076	RRM_1	AT3G16380.1
Manes.08G125800.v6.1	2.20249	8.89581	pfam00999	Na_H_Exchanger	AT3G05030.1
Manes.04G105800.v6.1	13.5832	5.60115	pfam01061	ABC2_membrane	AT1G15520.1
Manes.08G164700.v6.1	2.53651	2.20491	pfam06749	DUF1218	AT5G17210.1
Manes.10G093800.v6.1	3.67086	4.92622	.	.	0
Manes.15G106600.v6.1	3.46419	2.21385	pfam13520	AA_permease_2	AT3G13620.1
Manes.14G035700.v6.1	8.33489	3.44234	pfam00002	7tm_2	0
Manes.17G048500.v6.1	2.86539	4.19748	pfam01823	MACPF	AT1G28380.1
Manes.05G160200.v6.1	18.9842	2.48503	pfam01148	CTP_transf_1	0
Manes.08G152900.v6.1	8.95588	10.8883	pfam01699	Na_Ca_ex	AT5G17850.1
Manes.03G170600.v6.1	2.679	3.54038	pfam08392	FAE1_CUT1_RppA	AT1G04220.1
Manes.18G089700.v6.1	54.6183	7.66291	pfam04564	U-box	AT3G18710.1
Manes.09G179100.v6.1	2.93438	67.596	pfam01501	Glyco_transf_8	AT1G56600.1
Manes.14G029100.v6.1	3.11013	22.4476	pfam01554	MatE	AT4G23030.1
Manes.12G110100.v6.1	5.95284	2.50254	pfam00583	Acetyltransf_1	AT2G23060.1
Manes.10G132300.v6.1	2.61515	2.65912	pfam07800	DUF1644	AT1G68140.3
Manes.02G047200.v6.1	3.51703	2.71387	pfam13499	EF-hand_7	AT5G39670.1
Manes.14G123500.v6.1	2.7599	11.4651	pfam12146	Hydrolase_4	AT5G14980.1
Manes.17G015100.v6.1	2.27184	9.65174	pfam00722	Glyco_hydro_16	AT1G32170.1
Manes.16G021800.v6.1	2.05305	2.42031	pfam01412	ArfGap	AT5G54310.1
Manes.05G129000.v6.1	2.48359	3.7151	pfam03479	DUF296	AT1G76500.1
Manes.09G136500.v6.1	2.12471	6.24713	pfam04515	Choline_transpo	AT3G04440.1
Manes.11G035400.v6.1	4.60369	8.6759	pfam13962	PGG	AT1G34050.1
Manes.04G137800.v6.1	2.7078	2.9815	pfam02701	zf-Dof	AT3G21270.1
Manes.08G061200.v6.1	4.09761	6.60491	pfam00450	Peptidase_S10	AT1G28110.1
Manes.11G122200.v6.1	2.037	2.81016	pfam07714	Pkinase_Tyr	AT3G47570.1
Manes.10G020100.v6.1	40.4241	24.4458	pfam00011	HSP20	AT1G53540.1
Manes.08G017900.v6.1	2.17441	16.729	pfam03016	Exostosin	AT5G03795.1
Manes.05G153800.v6.1	2.03037	8.83724	pfam00085	Thioredoxin	AT3G51030.1
Manes.01G194700.v6.1	2.7013	4.94886	pfam01501	Glyco_transf_8	AT1G70090.1
Manes.11G145500.v6.1	2.40564	2.83191	pfam04520	Senescence_reg	AT5G60680.1
Manes.15G052000.v6.1	3.62631	9.73592	pfam00232	Glyco_hydro_1	AT1G61820.1
Manes.15G027300.v6.1	2.04028	2.16275	pfam00083	Sugar_tr	AT5G26340.1
Manes.15G129200.v6.1	2.05255	3.79471	pfam00046	Homeobox	AT3G18010.1
Manes.06G132600.v6.1	15.9312	5.90125	pfam00083	Sugar_tr	AT5G61520.1
Manes.01G261700.v6.1	36.0587	8.50651	pfam14299	PP2	AT3G61060.1
Manes.03G164500.v6.1	2.72691	4.53522	pfam00069	Pkinase	AT1G08650.1
Manes.08G052900.v6.1	7.33531	4.99906	pfam04577	DUF563	AT2G41640.1
Manes.18G067800.v6.1	12.6897	3.14601	pfam04307	DUF457	AT1G78170.1
Manes.10G018000.v6.1	3.32378	2.03329	pfam00249	Myb_DNA-binding	AT3G11280.1
Manes.08G047200.v6.1	3.68393	8.82515	pfam00010	HLH	AT2G42280.1
Manes.17G061500.v6.1	2.33673	2.50235	pfam01823	MACPF	AT1G29690.1
Manes.02G173000.v6.1	2.89623	2.23835	pfam12730	ABC2_membrane_4	AT4G19950.1
Manes.01G220400.v6.1	169.793	37.7265	pfam03242	LEA_3	AT4G02380.1
Manes.04G088000.v6.1	12.1449	6.28078	pfam02458	Transferase	AT5G41040.1
Manes.01G038900.v6.1	2.13286	10.0737	pfam00046	Homeobox	AT2G46680.1
Manes.01G117500.v6.1	54.3486	69.3449	pfam00348	polyprenyl_synt	AT4G36810.1
Manes.08G096900.v6.1	12.7267	2.88224	pfam00847	AP2	AT2G40340.1
Manes.05G098400.v6.1	5.95731	2.59397	pfam07714	Pkinase_Tyr	AT2G02800.2
Manes.01G180000.v6.1	92.431	36.0187	pfam13639	zf-RING_2	AT4G26400.1
Manes.10G122600.v6.1	4.50138	2.95949	pfam00240	ubiquitin	AT4G05320.3
Manes.08G125500.v6.1	29.7118	4.01381	pfam05701	WEMBL	AT4G08630.1
Manes.04G027200.v6.1	22.3542	2.86669	pfam03202	Lipoprotein_10	0
Manes.05G013500.v6.1	3.55567	81.8633	pfam03106	WRKY	AT2G47260.1
Manes.06G056500.v6.1	81.0592	18.7612	pfam02298	Cu_bind_like	AT1G45063.2
Manes.09G100800.v6.1	2.34907	31.5279	pfam10250	O-FucT	AT3G54100.1
Manes.06G154900.v6.1	27.8827	47.1187	pfam13855	LRR_8	AT2G34930.1
Manes.03G055700.v6.1	3.47032	31.5542	pfam02990	EMP70	AT5G21280.1
Manes.16G095000.v6.1	36.4527	9.45137	pfam07714	Pkinase_Tyr	AT2G05940.1
Manes.07G058300.v6.1	3.31546	3.77475	pfam12935	Sec16_N	0
Manes.05G015300.v6.1	4.95609	3.4302	pfam00719	Pyrophosphatase	AT1G01050.1
Manes.01G106700.v6.1	15.3638	2.8054	pfam08132	AdoMetDC_leader	AT5G15948.1
Manes.03G005800.v6.1	4.08629	2.79571	pfam09153	DUF1938	AT5G57685.1
Manes.05G078300.v6.1	2.11052	2.01576	pfam02786	CPSase_L_D2	AT1G03090.2
Manes.13G030800.v6.1	16.1046	3.18297	pfam07714	Pkinase_Tyr	AT3G01490.1
Manes.03G020500.v6.1	4.02427	40.7157	pfam00447	HSF_DNA-bind	AT3G24520.1
Manes.02G163000.v6.1	20.2107	13.1174	pfam02442	L1R_F9L	0
Manes.13G098000.v6.1	5.48127	19.0626	pfam11914	DUF3432	0
Manes.02G190300.v6.1	3.04216	2.23881	pfam00083	Sugar_tr	AT1G22710.1
Manes.10G063200.v6.1	2.06424	2.92042	pfam00847	AP2	AT3G54320.1
Manes.05G040100.v6.1	2.47237	4.07891	pfam13639	zf-RING_2	AT4G33565.1
Manes.16G105900.v6.1	4.72338	11.0747	pfam00642	zf-CCCH	AT4G29190.1
Manes.12G032200.v6.1	16.0743	22.6338	pfam00249	Myb_DNA-binding	AT3G23250.1
Manes.14G152200.v6.1	13.3184	2.58665	pfam00722	Glyco_hydro_16	AT5G57560.1
Manes.01G267900.v6.1	6.54604	2.64878	pfam02519	Auxin_inducible	AT3G60690.1
Manes.06G106900.v6.1	3.30086	2.0958	pfam13855	LRR_8	AT4G20140.1
Manes.16G036100.v6.1	2.42092	4.6446	pfam00657	Lipase_GDSL	AT5G45920.1
Manes.15G023200.v6.1	16.1424	6.20596	pfam03089	RAG2	AT3G06145.1
Manes.03G143200.v6.1	21.4585	2.96582	pfam00005	ABC_tran	AT3G13220.1
Manes.13G124500.v6.1	5.88568	74.5108	pfam00447	HSF_DNA-bind	AT4G36990.1
Manes.01G154600.v6.1	39.9167	8.7575	pfam03018	Dirigent	AT4G23690.1
Manes.06G050300.v6.1	4.23703	8.7103	pfam03798	TRAM_LAG1_CLN8	AT1G52720.1
Manes.12G147100.v6.1	3.24067	2.73629	pfam01764	Lipase_3	AT3G52430.1
Manes.14G050700.v6.1	4.67112	6.63267	pfam11868	DUF3388	0
Manes.04G067100.v6.1	4.38292	2.97711	pfam07714	Pkinase_Tyr	AT2G17220.1
Manes.06G069200.v6.1	2.54273	2.52077	pfam01055	Glyco_hydro_31	AT1G68560.1
Manes.S042600.v6.1	15.7692	7.37989	pfam15094	DUF4556	AT2G42760.1
Manes.17G031300.v6.1	3.29334	3.17525	pfam04564	U-box	AT4G21350.1
Manes.13G033800.v6.1	15.9827	8.06748	pfam11935	DUF3453	AT1G56320.1
Manes.08G079100.v6.1	2.21883	10.6621	pfam01439	Metallothio_2	AT3G09390.1
Manes.05G154500.v6.1	Inf	Inf	pfam14111	DUF4283	0
Manes.09G044600.v6.1	7.14106	2.60771	pfam05739	SNARE	AT3G11820.1
Manes.03G146200.v6.1	11.0231	5.00832	pfam02458	Transferase	AT3G26040.1
Manes.18G020000.v6.1	2.22309	4.24484	pfam06090	Ins_P5_2-kin	AT5G42810.1
Manes.14G039100.v6.1	4.80614	3.41667	pfam01277	Oleosin	AT4G25140.1
Manes.11G068500.v6.1	12.6613	5.13502	pfam00226	DnaJ	AT1G80920.1
Manes.13G009500.v6.1	3.77204	3.20844	pfam14724	mit_SMPDase	AT3G01960.1
Manes.13G033600.v6.1	2.223	2.19516	pfam00241	Cofilin_ADF	AT2G31200.1
Manes.06G090000.v6.1	3.12683	3.68393	pfam00929	RNase_T	AT5G61390.1
Manes.03G105500.v6.1	2.09825	13.7374	pfam00155	Aminotran_1_2	AT5G53970.1
Manes.01G036100.v6.1	2.39224	3.22072	pfam00732	GMC_oxred_N	0
Manes.02G164500.v6.1	5.72492	4.32172	pfam01546	Peptidase_M20	AT1G44350.1
Manes.09G110400.v6.1	3.41347	2.88782	pfam09770	PAT1	AT3G51750.1
Manes.08G025900.v6.1	2.53818	2.19515	pfam02948	Amelogenin	AT3G52710.1
Manes.17G029700.v6.1	5.10473	3.18785	pfam07714	Pkinase_Tyr	AT4G05200.1
Manes.S045100.v6.1	96.7377	8.74307	pfam00182	Glyco_hydro_19	AT3G54420.1
Manes.10G141700.v6.1	2.56076	2.78979	pfam00931	NB-ARC	AT3G14470.1
Manes.01G121300.v6.1	68.0672	3.21828	pfam04564	U-box	AT5G37490.1
Manes.02G199800.v6.1	2.31595	2.53046	pfam01582	TIR	AT5G17680.1
Manes.17G042800.v6.1	3.74074	2.01513	pfam02701	zf-Dof	AT1G28310.2
Manes.06G147200.v6.1	2.96781	219.794	pfam03251	Tymo_45kd_70kd	AT4G25580.1
Manes.13G008500.v6.1	3.8275	17.752	pfam05553	DUF761	0
Manes.14G043500.v6.1	4.20195	3.27758	pfam01358	PARP_regulatory	AT5G07330.1
Manes.03G039100.v6.1	16.9277	12.3682	pfam00067	p450	AT3G14690.1
Manes.03G107200.v6.1	4.94912	3.66854	pfam02171	Piwi	AT1G31280.1
Manes.07G025400.v6.1	Inf	Inf	pfam13962	PGG	AT3G13950.1
Manes.01G090500.v6.1	2.22759	4.5448	pfam07891	DUF1666	AT5G39785.1
Manes.02G036000.v6.1	5.77015	3.68915	pfam02358	Trehalose_PPase	AT4G22590.1
Manes.11G141600.v6.1	Inf	Inf	pfam00190	Cupin_1	AT2G28490.1
Manes.12G022000.v6.1	2.33422	14.4987	pfam13639	zf-RING_2	AT1G67856.1
Manes.11G139000.v6.1	88.434	3.87528	pfam02405	Permease	0
Manes.05G135100.v6.1	2.51076	33.5124	pfam01925	TauE	AT5G42290.1
Manes.02G172500.v6.1	9.91003	3.68639	pfam00069	Pkinase	AT3G13690.1
Manes.12G049100.v6.1	15.1252	5.46693	pfam00226	DnaJ	AT4G13830.2
Manes.05G063900.v6.1	3.56028	284.805	pfam03073	TspO_MBR	AT2G47770.1
Manes.03G003500.v6.1	3.558	3.09579	pfam00122	E1-E2_ATPase	AT2G24520.1
Manes.07G006300.v6.1	3.56112	90.977	pfam06177	QueT	AT1G07985.1
Manes.15G037400.v6.1	40.7767	5.86757	pfam10329	DUF2417	AT1G06135.1
Manes.08G054000.v6.1	4.86633	3.01351	pfam13496	DUF4120	AT5G03990.1
Manes.03G088500.v6.1	78.3742	22.0662	pfam04819	DUF716	AT1G55230.1
Manes.06G020600.v6.1	4.95955	9.1964	pfam14009	DUF4228	AT1G06980.1
Manes.18G032000.v6.1	2.45266	2.84915	pfam00400	WD40	AT2G26490.1
Manes.11G029100.v6.1	47.6027	17.9775	pfam11955	PORR	0
Manes.15G094300.v6.1	64.3441	2.04608	pfam01453	B_lectin	AT1G78860.1
Manes.01G061600.v6.1	2.34488	4.31787	pfam13419	HAD_2	AT4G11570.1
Manes.01G009500.v6.1	7.59972	3.97642	pfam06378	DUF1071	AT2G44080.1
Manes.09G006000.v6.1	5.1757	6.81755	pfam07569	Hira	0
Manes.17G052100.v6.1	4.5741	2.87318	pfam00060	Lig_chan	AT2G29120.1
Manes.08G070300.v6.1	2.56078	4.19298	pfam13493	DUF4118	AT4G16400.1
Manes.13G013600.v6.1	14.0539	3.52002	pfam03514	GRAS	AT1G50420.1
Manes.10G152300.v6.1	9.9146	13.3215	pfam13261	DUF4052	AT2G31945.1
Manes.03G083500.v6.1	15.7617	6976.91	pfam03055	RPE65	AT3G14440.1
Manes.14G092000.v6.1	8.15802	4.23845	pfam13911	AhpC-TSA_2	AT2G37240.1
Manes.02G115200.v6.1	67.2846	119.75	pfam03547	Mem_trans	AT5G65980.1
Manes.15G041000.v6.1	3.69779	2.11471	pfam13417	GST_N_3	AT2G29420.1
Manes.08G049600.v6.1	2.42686	64.0498	pfam05691	Raffinose_syn	AT3G57520.1
Manes.13G041700.v6.1	12.8783	2.88725	pfam05617	Prolamin_like	0
Manes.02G181000.v6.1	3.56247	2.08904	pfam02496	ABA_WDS	0
Manes.04G113000.v6.1	Inf	Inf	pfam02298	Cu_bind_like	AT5G20230.1
Manes.08G034400.v6.1	8.17952	7.1686	pfam05739	SNARE	AT3G11820.1
Manes.02G157200.v6.1	33.2079	7.82263	pfam04523	Herpes_U30	0
Manes.18G069000.v6.1	3.92968	3.08072	pfam00847	AP2	AT1G78080.1
Manes.02G070600.v6.1	4.07937	2.28326	pfam00069	Pkinase	AT5G38210.1
Manes.05G087300.v6.1	5.7347	4.63913	pfam12171	zf-C2H2_jaz	AT3G09290.1
Manes.02G134700.v6.1	2.12257	2.92187	pfam00031	Cystatin	AT3G12490.2
Manes.08G034900.v6.1	14.7014	46.8515	pfam13561	adh_short_C2	AT3G51680.1
Manes.05G169600.v6.1	5.32303	4.71917	pfam00931	NB-ARC	AT4G33300.1
Manes.17G076700.v6.1	3.34838	13.3248	pfam00226	DnaJ	AT1G71000.1
Manes.12G130400.v6.1	26.0894	5.26656	pfam05701	WEMBL	AT4G40020.1
Manes.02G149300.v6.1	12.4737	4.27447	pfam06312	Neurexophilin	AT1G35210.1
Manes.17G028200.v6.1	5.27785	3.9492	pfam02714	DUF221	AT4G22120.3
Manes.08G135900.v6.1	6.20559	2.24497	pfam00400	WD40	AT4G32551.1
Manes.13G054800.v6.1	2.72812	2.89834	pfam04398	DUF538	AT3G07470.1
Manes.10G148400.v6.1	Inf	Inf	pfam08657	DASH_Spc34	AT4G12735.1
Manes.04G124300.v6.1	3.07613	2.83157	pfam13417	GST_N_3	AT1G78380.1
Manes.11G121400.v6.1	Inf	Inf	pfam00069	Pkinase	AT3G47570.1
Manes.11G110300.v6.1	25.4694	3.91941	pfam02068	Metallothio_PEC	AT2G23240.1
Manes.02G183800.v6.1	4.29706	3.74093	pfam01633	Choline_kinase	AT1G71697.1
Manes.10G006800.v6.1	9.98965	4.20493	pfam07107	WI12	AT3G10985.1
Manes.12G054700.v6.1	722.011	6.82723	pfam00201	UDPGT	AT2G43840.2
Manes.11G072100.v6.1	4.42944	14.1552	pfam10186	Atg14	0
Manes.01G206400.v6.1	15.0026	115.182	pfam04927	SMP	AT3G22500.1
Manes.14G109300.v6.1	5.24869	3.37207	pfam03034	PSS	AT1G15110.1
Manes.01G052500.v6.1	3.52924	6.4782	pfam10539	Dev_Cell_Death	AT5G42050.1
Manes.02G058600.v6.1	33.709	2.10131	pfam03214	RGP	AT3G02230.1
Manes.18G058400.v6.1	3.08303	9.37656	pfam11046	HycA_repressor	AT4G38060.2
Manes.12G029900.v6.1	2.30005	36.3888	pfam04564	U-box	AT1G60190.1
Manes.11G007600.v6.1	2.25716	3.08851	pfam14918	MTBP_N	0
Manes.07G093500.v6.1	5.05703	6.87836	pfam15504	DUF4647	AT5G02420.1
Manes.16G085200.v6.1	11.4359	117.979	pfam00249	Myb_DNA-binding	AT5G35550.1
Manes.10G080000.v6.1	52.8343	2.54655	pfam13912	zf-C2H2_6	AT1G27730.1
Manes.03G130100.v6.1	3.0495	8.1733	pfam04520	Senescence_reg	AT4G26950.1
Manes.02G126000.v6.1	2.99594	2.96373	pfam13417	GST_N_3	AT2G29420.1
Manes.S091600.v6.1	2.23782	2.38952	pfam07649	C1_3	AT1G20990.1
Manes.06G113100.v6.1	18.6947	8.57046	pfam00651	BTB	AT5G63160.1
Manes.17G026600.v6.1	2.42626	3.01345	pfam02991	Atg8	AT1G62040.2
Manes.12G013700.v6.1	7.96287	6.30714	pfam14363	AAA_assoc	AT1G43910.1
Manes.09G046000.v6.1	8.50085	13.6501	pfam04564	U-box	AT2G35930.1
Manes.01G230400.v6.1	Inf	Inf	pfam01553	Acyltransferase	AT4G01950.1
Manes.02G167100.v6.1	4.36288	2.40171	pfam01490	Aa_trans	AT1G77380.1
Manes.18G010200.v6.1	4.00967	28.7749	pfam03330	DPBB_1	AT1G20190.1
Manes.02G043600.v6.1	2.93125	2.42832	pfam06814	Lung_7-TM_R	AT2G35658.2
Manes.09G164200.v6.1	5.41379	3.65212	pfam13639	zf-RING_2	AT3G05200.1
Manes.03G092300.v6.1	2.24969	4.47438	pfam11721	Malectin	AT3G14840.2
Manes.01G110300.v6.1	3.46854	2.4887	pfam15255	CAP-ZIP_m	AT3G02555.1
Manes.16G116200.v6.1	7.56543	4.26189	pfam00447	HSF_DNA-bind	AT3G24520.1
Manes.10G054200.v6.1	2.22575	2.17746	pfam00069	Pkinase	AT3G47570.1
Manes.12G157900.v6.1	27.5181	2.24993	pfam08241	Methyltransf_11	AT4G22530.1
Manes.04G113600.v6.1	7.30584	4.13795	pfam00011	HSP20	AT1G52560.1
Manes.08G173900.v6.1	2.18407	2.21818	pfam00069	Pkinase	AT3G51630.2
Manes.02G050900.v6.1	9.45665	6.68467	pfam10409	PTEN_C2	AT5G39400.1
Manes.15G180600.v6.1	7.5168	6.56767	pfam01428	zf-AN1	AT3G28210.1
Manes.15G013100.v6.1	4.98711	3.3282	pfam05348	UMP1	AT5G24860.1
Manes.01G160800.v6.1	3.98466	2.55273	pfam12796	Ank_2	AT5G58620.1
Manes.06G040800.v6.1	4.23166	27.8765	pfam00083	Sugar_tr	AT4G02040.1
Manes.10G028000.v6.1	2.6793	3.02108	pfam00378	ECH	AT4G16210.1
Manes.13G009100.v6.1	133.4	6.57694	pfam03106	WRKY	AT5G13080.1
Manes.10G135500.v6.1	4.33281	5.32311	pfam01576	Myosin_tail_1	AT1G01550.1
Manes.13G140900.v6.1	6.32551	2.06855	pfam00891	Methyltransf_2	AT4G35150.1
Manes.11G086500.v6.1	2.00392	2.52744	pfam00582	Usp	AT2G21620.1
Manes.18G063500.v6.1	3.5809	4.80426	pfam00128	Alpha-amylase	AT4G09020.1
Manes.14G021900.v6.1	5.12786	4.23602	pfam00403	HMA	AT1G01490.2
Manes.01G198900.v6.1	5.92162	2.73675	pfam00982	Glyco_transf_20	AT1G23870.1
Manes.03G199400.v6.1	2.06122	3.42506	pfam13123	DUF3978	AT3G06780.1
Manes.02G182000.v6.1	39.3868	488.58	pfam14935	TMEM138	AT2G33710.1
Manes.06G156400.v6.1	5.35398	2.41179	pfam00847	AP2	AT4G27950.1
Manes.13G024400.v6.1	2.65707	2.59991	pfam14009	DUF4228	0
Manes.01G084300.v6.1	2.34695	2.12205	pfam07797	DUF1639	AT3G60410.1
Manes.10G095300.v6.1	24.9518	3.94273	pfam03478	DUF295	AT2G17690.1
Manes.16G025800.v6.1	6.07228	3.86284	pfam00571	CBS	AT4G27460.1
Manes.S098100.v6.1	3.70929	4.91925	pfam03081	Exo70	AT2G39380.1
Manes.02G031200.v6.1	5.55132	2.38265	pfam08879	WRC	AT4G37740.1
Manes.10G056800.v6.1	33.2816	2.38636	pfam07939	DUF1685	AT4G33985.1
Manes.01G129900.v6.1	7.57959	3.21232	pfam00447	HSF_DNA-bind	AT4G18880.1
Manes.17G058500.v6.1	5.45359	2.30952	pfam15404	PH_4	AT2G42760.1
Manes.11G091500.v6.1	16.346	10.1145	pfam00257	Dehydrin	AT2G21490.1
Manes.02G146000.v6.1	34.2096	4.16629	pfam00153	Mito_carr	AT4G24570.1
Manes.09G006400.v6.1	16.0529	12.4028	pfam13912	zf-C2H2_6	AT4G35280.1
Manes.16G020700.v6.1	61.7462	17.0625	pfam12937	F-box-like	AT1G61340.1
Manes.01G222600.v6.1	16.7651	2.28806	pfam00847	AP2	AT2G47520.1
Manes.18G063400.v6.1	9.21724	6.4553	pfam00487	FA_desaturase	0
Manes.10G020300.v6.1	6.26536	2.17134	pfam10156	Med17	AT1G22370.2
Manes.15G103800.v6.1	3.49904	2.38113	pfam03294	Pox_Rap94	AT5G19900.1
Manes.08G097100.v6.1	4.13657	20.3947	pfam01187	MIF	AT3G51660.1
Manes.01G114700.v6.1	3.81709	4.79999	pfam01967	MoaC	AT2G01300.1
Manes.01G188300.v6.1	3.76257	2.26854	pfam13090	PP_kinase_C	0
Manes.06G005300.v6.1	61.2492	4.4074	pfam01280	Ribosomal_L19e	AT3G16780.1
Manes.09G112700.v6.1	45.2735	2.41775	pfam03106	WRKY	AT2G38470.1
Manes.11G133100.v6.1	6.73134	8.00526	pfam06682	DUF1183	0
Manes.05G153900.v6.1	2.87744	8.16168	pfam04293	SpoVR	0
Manes.07G100900.v6.1	2.47305	5.48538	pfam00085	Thioredoxin	AT3G54960.1
Manes.16G130900.v6.1	2.48724	3.13786	pfam01133	ER	AT5G10810.1
Manes.01G055100.v6.1	11.5232	2.06645	pfam03535	Paxillin	AT1G32928.1
Manes.12G139700.v6.1	3.08668	3.3369	pfam11882	DUF3402	AT5G65207.1
Manes.10G144800.v6.1	9.5791	7.78435	pfam11122	Spore-coat_CotD	0
Manes.01G106600.v6.1	12.4525	2.4327	pfam01536	SAM_decarbox	AT3G02470.4
Manes.12G147200.v6.1	38.4469	26.7322	pfam13520	AA_permease_2	AT2G01170.1
Manes.15G175100.v6.1	7.63131	84.1175	pfam01649	Ribosomal_S20p	AT5G15190.1
Manes.05G152700.v6.1	2.80462	3.50001	pfam00643	zf-B_box	AT1G75540.1
Manes.07G018700.v6.1	20.0857	3.71095	pfam00201	UDPGT	AT3G21760.1
Manes.03G208400.v6.1	7.98844	4.77169	pfam12899	Glyco_hydro_100	AT3G06500.1
Manes.16G116900.v6.1	8.06694	7.92997	pfam06376	DUF1070	AT5G53250.1
Manes.06G056600.v6.1	Inf	Inf	pfam02298	Cu_bind_like	AT1G45063.2
Manes.13G053600.v6.1	3.2092	7.43101	pfam03819	MazG	AT3G25400.1
Manes.18G124300.v6.1	2.0409	2.29823	pfam13855	LRR_8	AT5G20480.1
Manes.11G078800.v6.1	27.2371	10.3164	pfam02893	GRAM	AT5G13200.1
Manes.13G123400.v6.1	39.4778	15.7062	pfam00069	Pkinase	AT5G67080.1
Manes.16G019100.v6.1	3.2728	4.26025	pfam00954	S_locus_glycop	AT4G21380.1
Manes.01G188200.v6.1	2.53826	2.24411	pfam00069	Pkinase	AT2G02800.2
Manes.15G020700.v6.1	Inf	Inf	pfam05129	Elf1	AT5G46030.1
Manes.17G024000.v6.1	2.123	2.97187	pfam07059	DUF1336	AT1G59650.1
Manes.15G117400.v6.1	2.18471	6.33974	pfam02893	GRAM	AT5G08350.1
Manes.06G176700.v6.1	2.15834	2.75569	pfam02800	Gp_dh_C	AT1G16300.1
Manes.01G275000.v6.1	3.74978	8.7034	pfam13639	zf-RING_2	AT1G53820.1
Manes.03G038100.v6.1	2.87209	3.82722	pfam03357	Snf7	AT2G06530.1
Manes.08G119200.v6.1	7.04373	3.2062	pfam00168	C2	AT1G09070.1
Manes.14G080400.v6.1	13.6773	94.5815	pfam02365	NAM	AT5G61430.1
Manes.09G156700.v6.1	3.50996	4.41249	pfam00383	dCMP_cyt_deam_1	AT5G28050.1
Manes.07G095100.v6.1	3.432	19.8487	pfam13912	zf-C2H2_6	AT5G04390.1
Manes.02G107300.v6.1	27.0211	13.991	pfam04043	PMEI	AT4G25250.1
Manes.14G064500.v6.1	6.35211	3.84132	pfam04750	Far-17a_AIG1	AT5G62960.1
Manes.15G080800.v6.1	2.63559	2.07226	pfam07714	Pkinase_Tyr	AT4G21380.1
Manes.09G137700.v6.1	2.41018	2.20078	pfam12352	V-SNARE_C	AT2G36900.1
Manes.18G098500.v6.1	10.9416	5.31937	pfam02639	DUF188	0
Manes.S080300.v6.1	8.45767	2.77853	pfam01428	zf-AN1	AT2G36320.1
Manes.16G100700.v6.1	8.66751	21.9751	pfam00447	HSF_DNA-bind	AT2G26150.1
Manes.01G091800.v6.1	7.42623	13.9042	pfam13639	zf-RING_2	AT1G26800.1
Manes.01G202700.v6.1	2.3731	2.59996	pfam04720	DUF506	AT3G22970.1
Manes.12G159400.v6.1	3.35643	14.6697	pfam13520	AA_permease_2	AT2G01170.1
Manes.14G101400.v6.1	2.50706	7.94017	pfam04484	DUF566	AT1G13360.1
Manes.15G046800.v6.1	4.35267	4.96083	pfam05512	AWPM-19	AT1G04560.1
Manes.16G017600.v6.1	19.1141	23.4174	pfam00069	Pkinase	AT4G03230.1
Manes.14G086200.v6.1	2.5436	3.16824	pfam07897	DUF1675	AT1G13740.1
Manes.18G051600.v6.1	2.41934	3.45811	pfam00046	Homeobox	AT4G37790.1
Manes.07G018400.v6.1	14.5324	2.71339	pfam00201	UDPGT	AT3G21760.1
Manes.08G051600.v6.1	5.73997	18.4545	pfam00447	HSF_DNA-bind	AT2G41690.1
Manes.03G118200.v6.1	5.71386	5.78671	pfam07714	Pkinase_Tyr	AT4G21380.1
Manes.10G115100.v6.1	2.02681	2.06913	pfam00034	Cytochrom_C	AT4G10040.1
Manes.10G094300.v6.1	12.0542	2.58853	pfam06022	Cir_Bir_Yir	0
Manes.07G116900.v6.1	3.7681	2.53293	pfam00168	C2	AT3G55470.2
Manes.15G108400.v6.1	36.7969	12.1157	pfam00847	AP2	AT5G19790.1
Manes.18G012700.v6.1	5.56047	4.15832	pfam00314	Thaumatin	AT1G75800.1
Manes.07G125500.v6.1	Inf	Inf	pfam13966	zf-RVT	AT4G29090.1
Manes.12G048000.v6.1	4.98949	15.2492	pfam07897	DUF1675	AT3G07250.1
Manes.02G139900.v6.1	15.993	7.53387	pfam14009	DUF4228	AT5G12340.1
Manes.08G018800.v6.1	3.44719	5.16735	pfam00224	PK	AT3G52990.1
Manes.03G009600.v6.1	13.0241	23.0645	pfam00069	Pkinase	AT5G25110.1
Manes.05G147700.v6.1	15.3489	118.019	pfam02704	GASA	AT1G75750.1
Manes.07G005200.v6.1	14.1685	2.18503	pfam10320	7TM_GPCR_Srsx	0
Manes.02G076100.v6.1	89.9761	90.7952	pfam00348	polyprenyl_synt	AT4G36810.1
Manes.03G129600.v6.1	17.3309	6.46714	pfam01253	SUI1	AT5G54940.2
Manes.11G052600.v6.1	11.6487	906.421	pfam02987	LEA_4	AT1G52690.2
Manes.14G025500.v6.1	14.1505	17.3194	pfam00501	AMP-binding	AT3G48990.1
Manes.08G057900.v6.1	122.473	15.0995	pfam12937	F-box-like	AT3G44326.1
Manes.01G100400.v6.1	2.20752	2.80249	pfam03106	WRKY	AT2G03340.1
Manes.09G150400.v6.1	4.49609	3.38664	pfam04576	Zein-binding	AT1G08800.2
Manes.09G073500.v6.1	2.63021	14.2593	pfam01194	RNA_pol_N	AT2G32190.1
Manes.09G118700.v6.1	2.35761	2.61681	pfam00728	Glyco_hydro_20	AT1G05590.1
Manes.12G072900.v6.1	5.63735	116.817	pfam00069	Pkinase	AT5G55090.1
Manes.03G111200.v6.1	2.91458	3.7941	pfam00201	UDPGT	AT5G03490.1
Manes.15G082500.v6.1	2.18978	140.352	pfam06764	DUF1223	AT5G54240.1
Manes.04G009800.v6.1	4.62506	2.37225	pfam01490	Aa_trans	AT1G08230.2
Manes.11G068200.v6.1	3.53071	2.85541	pfam14363	AAA_assoc	AT5G40010.1
Manes.S089300.v6.1	12.8925	9.81469	pfam05678	VQ	AT4G39720.1
Manes.01G138900.v6.1	5.3697	5.85694	pfam14363	AAA_assoc	AT3G50930.1
Manes.12G146500.v6.1	16.554	2.91497	pfam00813	FliP	0
Manes.07G092700.v6.1	10.0146	13.2162	pfam00413	Peptidase_M10	AT1G24140.1
Manes.01G023600.v6.1	9.78033	3.58902	pfam03088	Str_synth	AT3G57030.1
Manes.15G000900.v6.1	8.6377	2.95105	pfam13499	EF-hand_7	AT5G49480.1
Manes.17G032300.v6.1	7.61504	6.29644	pfam07714	Pkinase_Tyr	AT1G61370.1
Manes.02G117300.v6.1	2.08234	2.52426	pfam03547	Mem_trans	AT1G20925.1
Manes.15G162000.v6.1	2.26167	2.51909	pfam06813	Nodulin-like	AT3G01930.2
Manes.10G027900.v6.1	3.81864	3.05991	pfam06547	DUF1117	AT3G46620.1
Manes.15G102400.v6.1	5.25348	3.0765	pfam00069	Pkinase	AT1G16670.1
Manes.15G062100.v6.1	20.83	2.92846	pfam00067	p450	AT3G26300.1
Manes.17G027600.v6.1	70.6523	9.0579	pfam00082	Peptidase_S8	AT1G62340.1
Manes.08G101300.v6.1	3.20688	7.74249	pfam00847	AP2	AT5G13330.1
Manes.06G076600.v6.1	2.24076	6.53096	pfam05340	DUF740	AT3G25590.1
Manes.02G013400.v6.1	8.65136	20.6393	pfam12569	NARP1	AT5G41761.1
Manes.05G184600.v6.1	10.2574	4.20685	pfam01063	Aminotran_4	AT1G10070.2
Manes.10G121800.v6.1	39.56	9.96575	pfam00201	UDPGT	AT3G21750.1
Manes.04G078700.v6.1	5.73455	3.24693	pfam00195	Chal_sti_synt_N	AT4G34850.1
Manes.12G021900.v6.1	2.24452	2.48063	pfam05212	DUF707	AT1G67850.2
Manes.12G116800.v6.1	32.838	104.604	pfam01842	ACT	AT5G65890.1
Manes.10G016200.v6.1	31.0412	13.777	pfam07014	Hs1pro-1_C	AT2G40000.1
Manes.07G037700.v6.1	2.06766	2.20325	pfam13639	zf-RING_2	AT1G72220.1
Manes.01G065900.v6.1	7.10116	2.25477	pfam07714	Pkinase_Tyr	AT4G23050.1
Manes.06G049000.v6.1	2.70238	5.07806	pfam00717	Peptidase_S24	AT1G52600.1
Manes.11G017800.v6.1	5.48599	8.02875	pfam00171	Aldedh	AT1G54100.2
Manes.09G088500.v6.1	2.07122	2.25747	pfam12796	Ank_2	AT1G07710.1
Manes.11G018400.v6.1	2.45992	6.09259	pfam00171	Aldedh	AT1G54100.2
Manes.16G124700.v6.1	2.36091	5.65402	pfam00400	WD40	AT1G80490.2
Manes.07G118700.v6.1	3.35578	3.74774	pfam03479	DUF296	AT4G14465.1
Manes.02G098200.v6.1	203.553	359.29	pfam00257	Dehydrin	AT3G50980.1
Manes.08G057100.v6.1	22.5633	7.32954	pfam08241	Methyltransf_11	AT2G41380.1
Manes.13G001900.v6.1	2.00579	11.0788	pfam02450	LCAT	AT3G03310.1
Manes.04G026700.v6.1	16.8424	2.53504	pfam00069	Pkinase	AT3G45640.1
Manes.10G148500.v6.1	423.401	5.42392	pfam13346	ABC2_membrane_5	AT4G12735.1
Manes.S092100.v6.1	16.5139	6.86218	pfam04526	DUF568	AT5G35735.1
Manes.09G171600.v6.1	3.69518	4.23148	pfam00149	Metallophos	AT5G27840.1
Manes.11G056100.v6.1	2.30273	6.84947	pfam13414	TPR_11	AT1G80130.1
Manes.05G033200.v6.1	2.09581	3.38413	pfam10110	GPDPase_memb	AT2G45980.1
Manes.15G093400.v6.1	82.4028	5.30241	pfam14363	AAA_assoc	AT3G50940.1
Manes.01G006500.v6.1	28.8092	8.77142	pfam13912	zf-C2H2_6	AT3G60580.1
Manes.04G025500.v6.1	3.38303	2.01584	pfam02121	IP_trans	0
Manes.01G128000.v6.1	13.6881	6.81878	pfam03106	WRKY	AT1G29860.1
Manes.05G093100.v6.1	2.99793	2.17534	pfam13912	zf-C2H2_6	AT1G68360.1
Manes.16G045500.v6.1	2.35894	2.304	pfam03081	Exo70	AT4G31540.1
Manes.14G172900.v6.1	14.7801	9.08217	pfam04564	U-box	AT5G37490.1
Manes.11G008300.v6.1	11.1472	8.37235	pfam07859	Abhydrolase_3	AT1G68620.1
Manes.04G100300.v6.1	Inf	Inf	pfam00069	Pkinase	AT1G16130.1
Manes.04G120800.v6.1	4.70285	4.77698	pfam02309	AUX_IAA	AT3G04730.1
Manes.01G154400.v6.1	4.03329	5.26795	pfam00199	Catalase	AT4G35090.1
Manes.11G007000.v6.1	55.1097	2.86837	pfam05678	VQ	AT3G56710.1
Manes.10G033500.v6.1	15.4068	11.9759	pfam02362	B3	AT1G49475.1
Manes.15G010700.v6.1	15.6741	4.13127	pfam13639	zf-RING_2	AT3G16720.1
Manes.09G051400.v6.1	3.43501	10.8927	pfam02362	B3	AT5G06250.2
Manes.04G008500.v6.1	3.58869	9.13413	pfam09191	CD4-extracel	0
Manes.14G153300.v6.1	3.36147	6.61982	pfam15402	Spc7_N	AT4G30230.1
Manes.02G096300.v6.1	4.88348	3.40433	pfam05087	Rota_VP2	0
Manes.05G175300.v6.1	3.16916	4.09788	pfam05922	Inhibitor_I9	AT5G67090.1
Manes.11G140800.v6.1	2.75321	3.00946	pfam03195	DUF260	AT1G07900.1
Manes.01G172300.v6.1	2.84127	2.95241	pfam01237	Oxysterol_BP	AT5G59420.1
Manes.05G181600.v6.1	2.92261	4.56546	pfam00122	E1-E2_ATPase	AT1G27770.1
Manes.14G035900.v6.1	5.04007	3.27799	pfam07690	MFS_1	AT3G47420.1
Manes.12G024600.v6.1	5.58889	4.37701	pfam13855	LRR_8	AT3G07040.1
Manes.06G074200.v6.1	53.8775	59.2479	pfam14934	DUF4499	AT1G68765.1
Manes.09G183900.v6.1	2.95256	2.75496	pfam00350	Dynamin_N	AT1G60500.1
Manes.03G110600.v6.1	2.23136	4.82751	pfam00179	UQ_con	AT3G15355.1
Manes.10G031100.v6.1	74.3668	9.56957	pfam03107	C1_2	AT2G16050.1
Manes.03G166000.v6.1	20.2942	7.99994	pfam03171	2OG-FeII_Oxy	AT1G06620.1
Manes.16G130800.v6.1	32.4285	4.49536	pfam03092	BT1	AT5G10820.1
Manes.01G083700.v6.1	2.44466	2.37105	pfam01756	ACOX	AT2G35690.1
Manes.06G102700.v6.1	2.61675	3.72242	pfam07333	SLR1-BP	AT5G14890.1
Manes.14G088100.v6.1	3.23146	2.75297	pfam03214	RGP	AT3G08900.1
Manes.18G098700.v6.1	51.5932	5.58006	pfam03106	WRKY	AT2G38470.1
Manes.S022600.v6.1	2.70383	7.21143	pfam00719	Pyrophosphatase	AT3G53620.1
Manes.15G118300.v6.1	4.56825	92.2917	pfam03106	WRKY	AT4G18170.1
Manes.07G128800.v6.1	3.19046	5.24399	pfam10457	MENTAL	AT2G40095.1
Manes.06G103300.v6.1	2.63061	126.519	pfam04564	U-box	AT1G60190.1
Manes.18G037500.v6.1	5.74286	3.35621	pfam03364	Polyketide_cyc	AT4G17650.1
Manes.02G212800.v6.1	5.07897	19.3247	pfam00733	Asn_synthase	AT3G47340.1
Manes.02G096200.v6.1	2.76989	2.64524	pfam04006	Mpp10	AT3G50910.1
Manes.07G126900.v6.1	13.2353	5.93264	pfam07014	Hs1pro-1_C	AT2G40000.1
Manes.03G114200.v6.1	77.3873	295.859	pfam02365	NAM	AT4G27410.2
Manes.03G183200.v6.1	2.301	2.73504	pfam00808	CBFD_NFYB_HMF	AT1G08970.3
Manes.05G162300.v6.1	3.45913	4.19633	pfam00067	p450	AT1G75130.1
Manes.13G033900.v6.1	26.2546	9.90522	pfam00249	Myb_DNA-binding	AT2G31180.1
Manes.10G104800.v6.1	Inf	Inf	pfam14226	DIOX_N	AT3G13610.1
Manes.03G027900.v6.1	5.60713	2.12838	pfam15402	Spc7_N	AT5G56550.1
Manes.18G037600.v6.1	30.6159	3.3909	pfam15106	TMEM156	AT5G42900.3
Manes.03G103900.v6.1	2.09584	7.64137	pfam04209	HgmA	AT5G54080.1
Manes.02G020800.v6.1	8.21694	6.72923	pfam15336	Auts2	AT5G52430.1
Manes.S013300.v6.1	80.9936	7.77861	pfam14244	UBN2_3	0
Manes.12G006500.v6.1	4.18346	3.17443	pfam08740	BCS1_N	0
Manes.12G051600.v6.1	8.16811	6.92368	pfam00069	Pkinase	AT3G25250.1
Manes.03G191000.v6.1	4.85031	2.07425	pfam01373	Glyco_hydro_14	AT5G18670.1
Manes.15G044300.v6.1	5.45705	3.35876	pfam09531	Ndc1_Nup	AT2G33390.1
Manes.09G123700.v6.1	2.96962	4.21322	pfam03106	WRKY	AT3G56400.1
Manes.12G138500.v6.1	4.82766	2.73784	pfam07732	Cu-oxidase_3	AT4G39830.1
Manes.02G179300.v6.1	12.2505	2.11489	pfam00892	EamA	AT1G43650.1
Manes.06G155300.v6.1	31.6451	33.448	pfam00704	Glyco_hydro_18	AT5G24090.1
Manes.02G089600.v6.1	12.951	8.55542	pfam14541	TAXi_C	AT3G59080.1
Manes.11G063500.v6.1	15.4096	56.8542	pfam01061	ABC2_membrane	AT1G15520.1
Manes.05G016200.v6.1	5.67314	2.26797	pfam00072	Response_reg	AT5G24470.1
Manes.16G052700.v6.1	5.10058	11.5141	pfam01344	Kelch_1	AT1G15670.1
Manes.05G136500.v6.1	2.66224	4.2546	pfam14009	DUF4228	AT1G21010.1
Manes.05G110000.v6.1	2.13727	27.8116	pfam07897	DUF1675	AT1G13740.1
Manes.03G044100.v6.1	2.97863	4.09343	pfam00847	AP2	AT1G19210.1
Manes.05G165400.v6.1	3.564	2.00888	pfam03408	Foamy_virus_ENV	0
Manes.09G079400.v6.1	44.7229	11.7498	pfam00067	p450	AT3G26310.1
Manes.09G188100.v6.1	3.24543	6.10144	pfam00847	AP2	AT5G13330.1
Manes.03G060600.v6.1	13.1982	2.92456	pfam00069	Pkinase	AT5G25930.1
Manes.16G007400.v6.1	6.7387	2.37046	pfam11559	ADIP	0
Manes.04G047800.v6.1	15.6171	14.5881	pfam02351	GDNF	AT5G67550.1
Manes.05G188000.v6.1	12.6204	21.2504	pfam06848	Disaggr_repeat	0
Manes.08G109300.v6.1	29.1607	2118.2	pfam01501	Glyco_transf_8	AT1G56600.1
Manes.17G116400.v6.1	9.64842	10.6523	pfam07816	DUF1645	AT1G23710.1
Manes.11G016900.v6.1	3.8603	2.15963	pfam03081	Exo70	AT1G72470.1
Manes.03G211000.v6.1	2.66464	2.64308	pfam00917	MATH	AT3G17380.1
Manes.12G004300.v6.1	2.9856	2.09509	pfam14543	TAXi_N	AT1G05840.1
Manes.18G048000.v6.1	16.9941	7.66745	pfam13491	DUF4117	AT1G58420.1
Manes.12G022700.v6.1	11.8974	3.9	pfam00248	Aldo_ket_red	AT1G59960.1
Manes.15G050500.v6.1	11.8566	8.75131	pfam03055	RPE65	AT3G24220.1
Manes.10G067700.v6.1	99.405	2.14366	pfam00067	p450	AT4G19230.1
Manes.05G069200.v6.1	4.48566	3.32071	pfam03155	Alg6_Alg8	AT3G62990.1
Manes.14G139400.v6.1	2.15903	2.82589	pfam04957	RMF	AT5G35110.1
Manes.04G113500.v6.1	2.04348	3.03703	pfam06191	DUF995	AT3G15780.1
Manes.09G057900.v6.1	2.07222	2.13919	pfam01301	Glyco_hydro_35	AT5G20710.1
Manes.01G158600.v6.1	2.03816	2.30632	pfam04111	APG6	AT3G51500.1
Manes.06G028100.v6.1	2.02122	3.50329	pfam13292	DXP_synthase_N	AT4G15560.1
Manes.16G028500.v6.1	7.6452	2.40449	pfam04720	DUF506	AT4G32480.1
Manes.03G117300.v6.1	4.74926	2.16653	pfam12609	DUF3774	AT4G10270.1
Manes.01G047800.v6.1	2.07739	2.70131	pfam01370	Epimerase	AT4G10960.1
Manes.13G050600.v6.1	12.164	6.41263	pfam00226	DnaJ	AT4G13830.2
Manes.13G147200.v6.1	3.52217	2.47575	pfam13923	zf-C3HC4_2	AT4G03510.1
Manes.03G021500.v6.1	2.54072	2.43229	pfam00106	adh_short	AT4G13250.1
Manes.02G177400.v6.1	37.3958	5.48378	pfam00069	Pkinase	AT5G60900.1
Manes.11G121600.v6.1	5.75789	7.29203	pfam15455	Pro-rich_19	0
Manes.07G011500.v6.1	28.1603	11.9717	pfam05633	DUF793	AT1G01550.1
Manes.09G062400.v6.1	3.67165	12.0573	pfam14599	zinc_ribbon_6	AT5G22920.1
Manes.11G144400.v6.1	2.04399	2.0473	pfam13920	zf-C3HC4_3	AT3G09770.1
Manes.18G054100.v6.1	2.17942	2.03806	pfam00069	Pkinase	AT1G09970.1
Manes.01G085600.v6.1	44.5711	14.342	pfam00069	Pkinase	AT5G60900.1
Manes.09G009600.v6.1	Inf	Inf	pfam03028	Dynein_heavy	0
Manes.14G161600.v6.1	12.0342	10.4202	pfam13292	DXP_synthase_N	AT4G15560.1
Manes.15G073000.v6.1	4.75808	3.47991	pfam00067	p450	AT5G36110.1
Manes.10G135700.v6.1	2.2485	2.10132	pfam00931	NB-ARC	AT3G14470.1
Manes.02G005200.v6.1	2.07323	3.74184	pfam00249	Myb_DNA-binding	AT2G47460.1
Manes.01G094400.v6.1	2.39092	2.1288	pfam00844	Gemini_coat	0
Manes.16G090700.v6.1	106.831	4.90135	pfam08783	DWNN	AT5G47430.1
Manes.02G112800.v6.1	16.7566	81.2739	pfam00266	Aminotran_5	AT4G35630.1
Manes.17G015300.v6.1	2.18428	4.81959	pfam00295	Glyco_hydro_28	AT3G07840.1
Manes.02G004900.v6.1	2.65658	2.0151	pfam04061	ORMDL	AT5G42000.1
Manes.09G009700.v6.1	6.35364	6.8422	pfam14260	zf-C4pol	0
Manes.13G062200.v6.1	86.9419	3.92558	pfam03185	CaKB	AT3G13130.1
Manes.11G015600.v6.1	Inf	Inf	pfam00664	ABC_membrane	AT3G28860.1
Manes.03G098400.v6.1	21.6406	8.43408	pfam14111	DUF4283	AT2G01050.1
Manes.13G081100.v6.1	3.00771	12.6624	pfam00847	AP2	AT5G64750.1
Manes.02G027400.v6.1	2.07513	2.53522	pfam14299	PP2	AT1G12710.1
Manes.15G021700.v6.1	4.07387	4.96664	pfam13646	HEAT_2	AT5G18980.1
Manes.03G199300.v6.1	3.51443	89.818	pfam00847	AP2	AT3G16770.1
Manes.04G113100.v6.1	29.149	2.91261	pfam00332	Glyco_hydro_17	AT3G15800.1
Manes.18G037800.v6.1	2.23402	7.30417	pfam11523	DUF3223	AT1G45230.1
Manes.11G006800.v6.1	21.7974	4.6842	pfam14798	Ca_hom_mod	0
Manes.14G056100.v6.1	2.19889	2.1781	pfam02847	MA3	AT5G63190.1
Manes.15G064800.v6.1	3.23737	3.89509	pfam00307	CH	AT4G26700.2
Manes.05G184700.v6.1	10.7485	9.83058	pfam01063	Aminotran_4	AT1G10070.2
Manes.14G030100.v6.1	2.76238	14.0719	pfam01476	LysM	AT4G25433.1
Manes.13G082800.v6.1	8.42111	3.56197	pfam00266	Aminotran_5	0
Manes.06G090500.v6.1	5.67981	42.0948	pfam02365	NAM	AT5G61430.1
Manes.18G056800.v6.1	29.8858	4.21074	pfam06747	CHCH	AT5G09570.1
Manes.03G009300.v6.1	204.556	8.44693	pfam03106	WRKY	AT1G80840.1
Manes.08G147800.v6.1	18.0323	9.48663	pfam02365	NAM	AT3G04070.2
Manes.03G196300.v6.1	2.88202	2.04573	pfam13639	zf-RING_2	AT2G47700.1
	DEGs involved in ABA signaling perception and transduction pathway
	DEGs involved in JA signaling perception and transduction pathway
